# Supplementary material for: Cell-based cccDNA reporter assay combined with functional genomics identifies YBX1 as HBV cccDNA host factor and antiviral candidate target
Source: Gut. 2022 Dec 9;72(9):1745–57. doi: 10.1136/gutjnl-2020-323665 (PMC10423543; doi:10.1136/gutjnl-2020-323665)
Supplement: Supplementary data [file gutjnl-2020-323665supp001.xlsx]

## Sheet: Table S1
Supplementary Table S1: shRNA target sequences
Gene	Region	Gene ID	Target Seq
ALKBH3	CDS	221120	CCGGCATCAGAGAGGATATAA
ALKBH3	CDS	221120	TGGATCATGGGACCTTGTTAA
ALKBH3	CDS	221120	CGCACATTTGAGATGAGAAAG
ALKBH2	CDS	121642	AGTTGGAGAAAGAAGTAGAAT
ALKBH2	CDS	121642	GTGCTCATCAACAGGTATAAA
ALKBH2	CDS	121642	ACACAGTCCTGTTTGGCAAAG
ALKBH1	CDS	8846	GAAATACTCAGCAGATCATTA
ALKBH1	CDS	8846	CTTGAAGACCGCTCGTGTTAA
ALKBH1	CDS	8846	GACCGTAGGCTACCATTATAA
BRCA2	CDS	675	TACAATGTACACATGTAACAC
BRCA2	3UTR	675	TAGTACTTATGTTGCACAATG
BRCA2	CDS	675	GCGTTTCTAAACATTGCATAA
ATRIP	CDS	84126	GACCAGTGAACGAGCAAATAA
ATRIP	CDS	84126	GGACGTGTCCAGTGATCATAA
ATRIP	CDS	84126	TCTGAGAGGTGACTCCATAAA
ATM	CDS	472	CCAAGGTCTATGATATGCTTA
ATM	3UTR	472	CCTTTCATTCAGCCTTTAGAA
ATM	CDS	472	CAAACGAAATCTCAGTGATAT
CDK7	3UTR	1022	GCTGTAGAAGTGAGTTTGTAA
CDK7	CDS	1022	GAAACTGATCTAGAGGTTATA
CDK7	3UTR	1022	GTAAATGCTGTAGAAGTGAGT
CDKN2D	3UTR	1032	TAAGAAGGTAGAATGAGTTAT
CDKN2D	CDS	1032	CGCTGCAGGTCATGATGTTTG
CDKN2D	CDS	1032	CACACTGCTGTGGTCAGCTTT
BLM	3UTR	641	ACCGAATCTCAATGTACATAG
BLM	CDS	641	GACGCTAGACAGATAAGTTTA
BLM	CDS	641	CCATCAATGATTGGGATGATA
ATXN3	CDS	4287	CTCAGGATCGATCCTATAAAT
ATXN3	CDS	4287	ATTACAACAGGAAGGTTATTC
ATXN3	3UTR	4287	CGTCGGTTGTAGGACTAAATA
BRCC3	CDS	79184	CCCATCCTCATATAACTGTTT
BRCC3	CDS	79184	CCAACAGCATTTGCAGGAATT
BRCC3	CDS	79184	GCCGTCAGAATTGTTCACATT
CHAF1A	3UTR	10036	CCGACTCAATTCCTGTGTAAA
CHAF1A	CDS	10036	CCACCCGGAATGCAGATATTT
CHAF1A	CDS	10036	ACAAGCCCGTCTGCCGTTTAA
BRCA1	CDS	672	GAGTATGCAAACAGCTATAAT
BRCA1	CDS	672	TTGCAACCTGAGGTCTATAAA
BRCA1	CDS	672	ACTGATACTGCTGGGTATAAT
ATF2	3UTR	1386	GCGAAATCTGTGGTTGTAAAT
ATF2	CDS	1386	TGCTCTTTCACAGATCGTTAT
ATF2	CDS	1386	ATGAGTTGGCGAGTCCATTTG
APTX	CDS	54840	TTTGATTCTCCTTGCCTTAAA
APTX	3UTR	54840	CTTGTGAACTTCTACTCATTT
APTX	CDS	54840	GAACACCTTGAACTCCTTAAG
BTG2	3UTR	7832	GGTCATAGAGCTACCGTATTT
BTG2	CDS	7832	CACTCACAGAGCACTACAAAC
BTG2	CDS	7832	ATGAGGTGTCCTACCGCATTG
APEX1	3UTR	328	CAGAGAAATCTGCATTCTATT
APEX1	CDS	328	GCCTGGACTCTCTCATCAATA
APEX1	CDS	328	GCCGGGTGATTGTGGCTGAAT
APLF	3UTR	200558	GCCCTATAATGCTCTTCATAT
APLF	CDS	200558	CATCCTGGTGATAGTGATTAT
APLF	CDS	200558	CAAAGATAAATCCCAGCTAAA
BAZ1B	CDS	9031	GCAGATGACTTTGTTGGATAT
BAZ1B	CDS	9031	CGGGAAATCCAGGAAAGAGAA
BAZ1B	3UTR	9031	CCCACAACAAATCTAGCTCTA
ABL1	CDS	25	CCTCAGTTCGGTGAAGGAAAT
ABL1	CDS	25	ACTTGGTGAAGGTAGCTGATT
ABL1	3UTR	25	GAGTTCTTGAAGCATTTCAAA
CCNH	CDS	902	CGACCTGGTAGAATCTCTCTA
CCNH	CDS	902	CCAGGATAATAATGCTCACTT
CCNH	CDS	902	GCAACTTAATTTCCACCTTAT
MPLKIP	3UTR	136647	GTCAGGAACATCTTGGACAAA
MPLKIP	CDS	136647	GAATGTCTAATGAGTTGGAAA
MPLKIP	CDS	136647	AGGGTTCTCCAAGGACATCTA
ASF1A	CDS	25842	GTGAAGAATACGATCAAGTTT
ASF1A	CDS	25842	AGGCGTAACTGTTGTGCTAAT
ASF1A	CDS	25842	GCACCTAATCCAGGACTCATT
BABAM2	CDS	9577	GCTGTACTTGTCACCTCGAAT
BABAM2	CDS	9577	GCTGCTGATGTGGAAAGATTT
BABAM2	CDS	9577	CCCTCAGCTTTGCAGAATCTT
ATR	CDS	545	GATGAACACATGGGATATTTA
ATR	CDS	545	CTCCGTGATGTTGCTTGATTT
ATR	CDS	545	GCCGCTAATCTTCTAACATTA
ATRX	CDS	546	CGACAGAAACTAACCCTGTAA
ATRX	CDS	546	CCGGTGGTGAACATAAGAAAT
ATRX	CDS	546	GATAATCCTAAGCCTAATAAA
APEX2	3UTR	27301	CCTACCCTTCTCTTCCTCTTT
APEX2	CDS	27301	AGAAGGAGTTACGGACCTCAT
APEX2	CDS	27301	GCTTCTATCGTTTGCTGCAAA
BRIP1	CDS	83990	CGTCAGAACTTGGTGTTACAT
BRIP1	CDS	83990	ATAACCCAAGTCGCTATATAT
BRIP1	CDS	83990	CCAAGGAACTTCACGTCATTT
CETN2	CDS	1069	CTGGGCTTTGAACCCAAGAAA
CETN2	3UTR	1069	CACAAACACAGAACGACTTTA
CETN2	CDS	1069	ACTGGCACCATAGATGTTAAA
CCNO	CDS	10309	GATTCTTCTTGGCCCTTCCTT
CCNO	CDS	10309	CAGTACTTCCTTGACTCACAT
CCNO	CDS	10309	CATTGCGTTTCTCTTTCTGAA
EME1	CDS	146956	CCCTGAGAAGACAGGAAAGAA
EME1	CDS	146956	CAGGCGTATCTACCTTCAGAT
EME1	CDS	146956	CGGATAAAGAACGCCAGAATT
DCLRE1C	CDS	64421	GCAGAGATAAAGATGTGACAA
DCLRE1C	CDS	64421	CTGTGGAATTACTTCCAGAAA
DCLRE1C	CDS	64421	GATCCTCTGCCAATACCTTTA
ERCC4	CDS	2072	CCAAGATACGTGGTTCTTTAT
ERCC4	CDS	2072	GCGCAAGAGTATCAGTGATTT
ERCC4	CDS	2072	CCCACAGAATAATCGAGTCTT
DCLRE1A	CDS	9937	GTACACCTGCTCCGAAGTATT
DCLRE1A	CDS	9937	GAGATCAGATCACCTTATTAA
DCLRE1A	CDS	9937	GGTTTCAAATGATCCCTTATT
ERCC6	CDS	2074	GCGGTTAAGGAGATGGAATAA
ERCC6	CDS	2074	CAAGCAGGGTCAGCGAGTATT
ERCC6	CDS	2074	ATGGAGCCAGCCCAGATTATG
ERCC5	CDS	2073	AGAAGATGCTAAACGTATTAA
ERCC5	CDS	2073	AGCAGAAGAAATGCGTATAAA
ERCC5	CDS	2073	TTGGGATTGGACCGGAATAAG
ERCC3	CDS	2071	CGACTGAACAAACCCTATATC
ERCC3	CDS	2071	GATCCGAGAATGCCGCTTAAG
ERCC3	CDS	2071	TCTTGGTAGATCAAGGTTATA
CHEK1	CDS	1111	GTGGTTTATCTGCATGGTATT
CHEK1	CDS	1111	GTGACAGCTGTCAGGAGTATT
CHEK1	CDS	1111	GCTGTGAATAGAGTAACTGAA
DLGAP5	CDS	9787	GCACAGCAGTTGGTCAAACAA
DLGAP5	CDS	9787	CGAGAGTGATGTTCGAGCAAT
DLGAP5	CDS	9787	GCATTCCACAACAAACTACAT
ERCC8	CDS	1161	TGATGATGAGACTACAACAAA
ERCC8	3UTR	1161	GCGCTAATGCTTGAACTCTTT
ERCC8	CDS	1161	GATGGTGTGATTGTACTTTAT
CLK2	CDS	1196	GCTCTTCGATCTGATTGAAAG
CLK2	3UTR	1196	CGAGCCAGAGTTCACTCCTTC
CLK2	CDS	1196	GTCCGTTCTCGAAGCAGTTAT
DDX11	CDS	1663	GATCGACAACATCAACCTGTT
DDX11	CDS	1663	CGACTCCTTGAAACTGGAACT
DDX11	3UTR	1663	CACTCTCTGGTCTCAATTTAA
FAAP24	CDS	91442	GAACAGATGCTGCATTCTTTA
FAAP24	CDS	91442	ACCCGGATGAGTGAACAATAC
FAAP24	CDS	91442	GAAAGAGGCTTGTTCGGGTTA
DMC1	CDS	11144	TCTTGACTGCATTTGAGTATA
DMC1	CDS	11144	AGCTGGCATCTTCAAGCTATT
DMC1	CDS	11144	GCAGCGAACAAACTAATTGAA
CNOT7	CDS	29883	CGGTTACGACTTTGGCTACTT
CNOT7	CDS	29883	CGGTGTAATGTAGACTTGTTA
CNOT7	CDS	29883	GCTGACTATCAATACCAACTA
CIB1	CDS	10519	ATGATGACGGAACCTTGAACA
CIB1	CDS	10519	GTCTGAGATGAAGCAGCTCAT
CIB1	CDS	10519	CAGCCTTAGCTTTGAGGACTT
ERCC2	CDS	2068	CCCATACTTCCTTGCTCGATA
ERCC2	CDS	2068	CCAGTTCCAGATTCGTGAGAA
ERCC2	CDS	2068	GCGTTTCCAGTCTGTCATCAT
CSNK1D	CDS	1453	GTCCACCTCACAGAATAGCAT
CSNK1D	CDS	1453	CCCATCGAAGTGTTGTGTAAA
CSNK1D	CDS	1453	CCAAGAGACAGAAATACGAAA
DNA2	CDS	1763	CAGTTAACCGTGCAGTACAGA
DNA2	CDS	1763	GCCAGGAGATATCATTCATTT
DNA2	CDS	1763	AGTTTGTGATGGGCAATATTT
DNMT1	CDS	1786	GCCCAATGAGACTGACATCAA
DNMT1	CDS	1786	CGACTACATCAAAGGCAGCAA
DNMT1	CDS	1786	CCCGAGTATGCGCCCATATTT
DCLRE1B	CDS	64858	TCTACAGATGAGGAGTTTATT
DCLRE1B	CDS	64858	TGAGGAAAGTGCTGATCAATC
DCLRE1B	CDS	64858	CGTCACCTACAGGTATCTAAG
EME2	CDS	197342	TCAGGCTTGCTGTTCTGCAAA
EME2	CDS	197342	CCACACGTTCTCATCTTCAGA
EME2	3UTR	197342	CGTGGGACCACCAGGACAGCA
ERCC1	CDS	2067	CCAAGCCCTTATTCCGATCTA
ERCC1	CDS	2067	GCCGCCAGCAAGGAAGAAATT
ERCC1	CDS	2067	CAAGAGAAGATCTGGCCTTAT
DUT	CDS	1854	TGGTTCCACTGGAAAGAATTA
DUT	CDS	1854	AGTGCCTATGATTACACAATA
DUT	CDS	1854	GCTGGTGTCATAGATGAAGAT
EYA3	CDS	2140	CCAGGCTTTAGAGCTTGATTT
EYA3	CDS	2140	GCACATTATTCTTATCCCATT
EYA3	CDS	2140	CCTGGTTAGGAACTGCATTAA
EYA1	CDS	2138	CGACGGGTCTTTAAACAATTT
EYA1	CDS	2138	TGCAGTTGAGGGCCGAAATTG
EYA1	3UTR	2138	CCCACAAAGAATATAGATGAT
CSNK1E	CDS	1454	GTATATCCACTCCAAGAACTT
CSNK1E	CDS	1454	GAGCGGGTCCTTCGGAGATAT
CSNK1E	CDS	1454	CTCTTACCTACGTCAGCTCTT
CHEK2	CDS	11200	GAACAGATAAATACCGAACAT
CHEK2	CDS	11200	CCTCTCTCATGAGAACCTTAT
CHEK2	CDS	11200	ACGATGCCAAACTCCAGCCAG
DDB1	CDS	1642	CGTGTACTCTATGGTGGAATT
DDB1	3UTR	1642	CCTTGATTGGTGTTGCCAGTT
DDB1	CDS	1642	CGACCGTAAGAAGGTGACTTT
DDB2	3UTR	1643	GCAGAGGTGGTGATTTGTTAA
DDB2	CDS	1643	TCTGGATTCTTACCGGATATT
DDB2	CDS	1643	GCTGAAGTTTAACCCTCTCAA
HUS1	CDS	3364	GCCTTATGCAATATTGTGAAT
HUS1	CDS	3364	CCACTTCACACGAATCAGTAA
HUS1	CDS	3364	GAGAACTTCTTCAACGAATTT
FANCC	CDS	2176	GAGTTTGTGTCCCACTTATTA
FANCC	CDS	2176	CCTGGATACAGGGTGTATTAT
FANCC	3UTR	2176	TCAAGCTGCACATCTATTATT
FANCF	CDS	2188	GCCTCAGAACAACTTCCTGAA
FANCF	CDS	2188	TGGAACCCGGCATCCACAAAT
FANCF	CDS	2188	CCACCTCTGAAAGATAAAGTT
FANCM	CDS	57697	GACTTCATGAAACTCTATAAT
FANCM	CDS	57697	GCTCTCGGAAACTATGCTTAT
FANCM	CDS	57697	AGGACGAGAGGAACGTATTTA
FANCG	CDS	2189	GCCAAAGTCTTGTGACCTGTA
FANCG	CDS	2189	GCCTCTAAGGATCTGCTGTTA
FANCG	3UTR	2189	CCTGTGAAATTTGCCCTAGTT
FANCE	CDS	2178	GATATGCCAGAGGAACCTGAT
FANCE	CDS	2178	GAGCTTCTCCACTGTCTGAAA
FANCE	CDS	2178	CCCGAACATAAGTCACTGGAA
FANCA	CDS	2175	GCTAATCATTCTAGTTCATTT
FANCA	CDS	2175	CAGAGTTCTTTGTTGCTTGAA
FANCA	CDS	2175	CTTATCTCCAGGCCTTATTAA
FANCD2	3UTR	2177	ACAGATGCTTTCGACAATTTA
FANCD2	3UTR	2177	GGGAGAAGTCATCGAAGTATT
FANCD2	CDS	2177	ATCATGCAGCTGATCAGTATT
FANCB	CDS	2187	CCCTTTACAGAGAAATAACTT
FANCB	CDS	2187	GTTGTTTATCTGAGGAAGAAT
FANCB	CDS	2187	CGGCTGCTTTATCAGACAGAA
GADD45G	CDS	10912	CATCGCGCTGCAGATCCATTT
GADD45G	CDS	10912	AGGACACAGTTCCGGAAAGCA
GADD45G	3UTR	10912	GCCCTGGACTTGGTACAGTTT
SLX1A	CDS	548593	TGCCTGGCAGAGGAGTTTCTT
SLX1A	CDS	548593	GTGCCAGATGGACACTGAGAA
SLX1A	CDS	548593	CCAGACCATCCAGGATGAAGA
FEN1	3UTR	2237	TTGCCGTCTTGTACCCTTAAG
FEN1	CDS	2237	GCAGTGACTACTGTGAGAGTA
FEN1	CDS	2237	GATGCCTCTATGAGCATTTAT
IGHMBP2	CDS	3508	CCTTTGAGTATCTTGACGATA
IGHMBP2	CDS	3508	CCCAGAAAGAAGCGGTTTCAT
IGHMBP2	CDS	3508	GAAGACCCTGGTGGAGTATTT
FANCL	CDS	55120	TGCAGAATCACCAGATTATTT
FANCL	CDS	55120	GCAGAATTGCATTAGGTAATA
FANCL	CDS	55120	GCCTTATTGAAGAGATAGGAA
GEN1	CDS	348654	CCTGCAATGTTAGACCACCAA
GEN1	CDS	348654	CCTGAACATTATGCTATGGAA
GEN1	CDS	348654	CCAGATGAAGTAATGAGCTTT
IP6K3	3UTR	117283	CCCTTAGATGTCTTCATAATA
IP6K3	CDS	117283	GACCAGACCCTGGCTATATTT
IP6K3	CDS	117283	CTTTGCTCATACCACATACAA
GTF2H1	CDS	2965	GCTGCCATCATCAAGAGATTT
GTF2H1	CDS	2965	CCTACAACAAGCTCCACACAT
GTF2H1	CDS	2965	GTCCATTGAATATGAAGACTT
GTF2H3	3UTR	2967	ATGCATGCCATACGAAATTTG
GTF2H3	CDS	2967	CCGATTCTTATATCCTGGAAA
GTF2H3	3UTR	2967	GACTCATCATAGGCTTTCTAA
GTF2H2	CDS	2966	CATAGCTATGCAGACTCTAAA
GTF2H2	CDS	2966	GAGCTACCTGTTGAGTGTAAA
GTF2H2	3UTR	2966	GTCACAGAAATACCTGAAATT
H2AFX	CDS	3014	GGAGTACCTCACCGCTGAGAT
H2AFX	CDS	3014	CAACAAGAAGACGCGAATCAT
H2AFX	CDS	3014	TGCTGCTGCCCAAGAAGACCA
GTF2H5	CDS	404672	GATGACACTCACGTCTTTGTA
GTF2H5	CDS	404672	CGTCTTTGTAATAGCAGAATT
GTF2H5	CDS	404672	TGGGTGAATTAATGGACCAAA
GADD45A	CDS	1647	AGAGCAGAAGACCGAAAGGAT
GADD45A	CDS	1647	CGAATCCACATTCATCTCAAT
GADD45A	CDS	1647	CCAGTGATTAATCTCCCTGAA
FANCI	CDS	55215	ATGTAAGCTCGGAGCTAATAT
FANCI	CDS	55215	CTAGTTCCTCATAGATCTTAT
FANCI	CDS	55215	CATGTGGAAGGCACCATTATT
MTOR	CDS	2475	GCTGTGCTACACTACAAACAT
MTOR	CDS	2475	GCAACCCTTCTTTGACAACAT
MTOR	CDS	2475	CCCGGATCATTCACCCTATTG
FAN1	CDS	22909	CCAGATTTCACTCTTAGGAAT
FAN1	CDS	22909	GCTACTGGTCAGAAGTTATAT
FAN1	3UTR	22909	AGAGACACGTGGCAGAATAAC
HELQ	CDS	113510	GCAGAACTCTTCAAATGATTT
HELQ	CDS	113510	ACGTTGTCAACAGGCTATATC
HELQ	CDS	113510	CGTAAGGACAATTGATCATTT
ABRAXAS1	3UTR	84142	CCTTGTATGTAACTGGCATAA
ABRAXAS1	CDS	84142	ATCCTTAAAGGAGGTACATAA
ABRAXAS1	CDS	84142	TATTCACGGTCTCCTACATTT
HMGB1	CDS	3146	CCCAGATGCTTCAGTCAACTT
HMGB1	CDS	3146	CCGTTATGAAAGAGAAATGAA
HMGB1	CDS	3146	GAAGAAGATGAAGATGAAGAA
HMGB2	CDS	3148	GCAGCTAAGCTAAAGGAGAAA
HMGB2	CDS	3148	CCATCTGCCTTCTTCCTGTTT
HMGB2	3UTR	3148	GCTCAATACTAGCTTCAGTAT
GTF2H4	CDS	2968	GAGTGATTCTCTGTTGAACTT
GTF2H4	CDS	2968	GAACCGAGTACACCTACAATG
GTF2H4	CDS	2968	CGGCTCAGCTCTGGTACTTTA
MPG	CDS	4350	CCTGTACGTGTACATCATTTA
MPG	CDS	4350	CCCATACCGCAGCATCTATTT
MPG	CDS	4350	ATTTCTGGGACAGGTCCTAGT
MSH3	CDS	4437	GCAAGGAGTTATGGATTAAAT
MSH3	CDS	4437	TATGCTACACTTGAGTATTTC
MSH3	CDS	4437	AGCCCGAGAGCTCAATATTTA
MMS19	CDS	64210	CCAGCGGTTCTTCACAGATAA
MMS19	CDS	64210	TGGAGCTATGAAGACAAAGAT
MMS19	CDS	64210	CCGACACACAGTCTACAATAT
MLH1	CDS	4292	CCAAGTGAAGAATATGGGAAA
MLH1	3UTR	4292	GTGTTCTTCTTTCTCTGTATT
MLH1	CDS	4292	GCCTGATCTATACAAAGTCTT
MSH5	CDS	4439	GATACTAGTGACTCCACTATC
MSH5	CDS	4439	GTTGAACTGGAAGACTATAAT
MSH5	CDS	4439	TCATCAGGGAAGAGCATATAC
MUTYH	CDS	4595	CCACTGTGATCAACTACTATA
MUTYH	CDS	4595	AGCTGGTACGACCAAGAGAAA
MUTYH	CDS	4595	CAAGTCCTGGATAATTTCTTT
MLH3	CDS	27030	CGCTTAGAGAACTCTGATGTT
MLH3	CDS	27030	CCACACAGGATAATTCCTTTA
MLH3	CDS	27030	GCTGAGAGCTTAGCAGTTAAA
MSH2	CDS	4436	GCCTTGCTGAATAAGTGTAAA
MSH2	CDS	4436	CCTGGCAATCTCTCTCAGTTT
MSH2	CDS	4436	ATTCATGTTGCAGAGCTTGCT
MSH6	CDS	2956	GCCAGAAGAATACGAGTTGAA
MSH6	CDS	2956	AGGCGAAGTAGCCGCCAAATA
MSH6	CDS	2956	CGGCGACTGTTCTATAACTTT
MRE11	CDS	4361	ACGACTGCGAGTGGACTATAG
MRE11	CDS	4361	TGTTGGTTTGCTGCGTATTAA
MRE11	CDS	4361	ACGGGAACGTCTGGGTAATTC
LIG1	CDS	3978	ACCGGAAGCAAAGTCAGATTC
LIG1	CDS	3978	GCAGCTTTCACCTGCGAATAC
LIG1	CDS	3978	TCCTGGAGCAGTCAGTGAAAG
MBD4	3UTR	8930	GCCTAGTGTGTGTGCTTTCTT
MBD4	CDS	8930	GCAACGACTCTTACCGAATTT
MBD4	CDS	8930	CCCACGACGTAAAGCCTTTAA
NABP1	CDS	64859	GATGAGATCGGAGGTCTTATA
NABP1	3UTR	64859	TGTCAATGCTAGCAGTAATTT
NABP1	CDS	64859	GAAAGGATGTCTGACACTTTA
LIG4	CDS	3981	TTCGACGCCACACCGTTTATT
LIG4	CDS	3981	ATGCATTCAAAGCAGATATAC
LIG4	CDS	3981	TTGCTATGGTGATAGTTATTT
NABP2	CDS	79035	GAACCAGAATGGGAATGGACT
NABP2	CDS	79035	CCAGCCTCTGAGAACCAGAAT
NABP2	CDS	79035	GCAGCATCAATATCTCTGTCT
NEIL3	CDS	55247	GCTAATGGATCAGAACGTATT
NEIL3	CDS	55247	AGAAGACAACAAACGATATAA
NEIL3	3UTR	55247	GCATTTAGTAATGACGATAAA
MGMT	3UTR	4255	TGAGCGACACACACGTGTAAC
MGMT	CDS	4255	GAGCAGGGTCTGCACGAAATA
MGMT	3UTR	4255	TAACGCTGCCCTTGCTCTATT
NBN	CDS	4683	CCATCCCAGTACAGGATTAAA
NBN	CDS	4683	CCTCTTGATGAACCATCTATT
NBN	CDS	4683	GCAAGCAGATACATGGGATTT
MDC1	CDS	9656	CCTCAGTAGTTGCAGATGTAA
MDC1	CDS	9656	CGGACCAAACTTAACCAAGAA
MDC1	CDS	9656	CCCTGAATCAACTGTCCCTAT
KAT2A	CDS	2648	GCTGAACTTTGTGCAGTACAA
KAT2A	CDS	2648	GGCTACCTACAAGGTCAATTA
KAT2A	CDS	2648	GCGCATGCCTAAGGAGTATAT
MUS81	CDS	80198	GAGTTGGTACTGGATCACATT
MUS81	CDS	80198	CCTAATGGTCACCACTTCTTA
MUS81	CDS	80198	CGCAGGAGCCATCAAGAATAA
MAD2L2	CDS	10459	CCCGGAGCTGAATCAGTATAT
MAD2L2	CDS	10459	CATCTTCCAGAAACGCAAGAA
MAD2L2	CDS	10459	CACTCGCAACATGGAGAAGAT
NEIL2	3UTR	252969	TCAGAGGTGCCAGTAGTATAA
NEIL2	CDS	252969	CGTGTCAGCTTTGGTTTGTTT
NEIL2	3UTR	252969	GACGTCTAAGTGTCCAGAAAG
KAT5	CDS	10524	TCGAATTGTTTGGGCACTGAT
KAT5	CDS	10524	CCTCCTATCCTATCGAAGCTA
KAT5	CDS	10524	CAAGTGTCTTCAGCGTCATTT
LIG3	CDS	3980	GCTGAGTAACTCCAACAGCAA
LIG3	CDS	3980	GCCAGTACCAAGAAAGCAGAA
LIG3	CDS	3980	CCGGATCATGTTCTCAGAAAT
NEIL1	CDS	79661	GCTACGAAACCTAGCGGATAA
NEIL1	CDS	79661	CGCCCTATGTTTCGTGGACAT
NEIL1	CDS	79661	CAGAGGTTCTTCAATGGCATT
MSH4	CDS	4438	ATTAGAGCCTCTAGTTGATAT
MSH4	CDS	4438	GGAGGTTCAGTCCAAGTATTA
MSH4	CDS	4438	CTTCTGCACGAGATACTAATT
HINFP	CDS	25988	ACTCTGAGCCAAGGTACAAAT
HINFP	CDS	25988	CTACAGCTGCAAGAATCTTAT
HINFP	3UTR	25988	TGGCCTGGGTTTGCATCATTC
MNAT1	CDS	4331	GCTATACTTCTTCTCTTGCTT
MNAT1	CDS	4331	GCCACTGCAGATAGAGACATA
MNAT1	CDS	4331	GTGGATTTGGACAACACCAAA
MEN1	3UTR	4221	GAATTCCATATCTTGCGAATC
MEN1	CDS	4221	CTGTACCTGAAAGGATCATAC
MEN1	CDS	4221	CCTCAGCCAAGACCTACTATC
POLN	CDS	353497	TTATGGTTTATGGCAACTATT
POLN	CDS	353497	CCAGTGTTGCTCAGAAGATTA
POLN	CDS	353497	GCATCCTAATATCCAAGGTAT
POLH	CDS	5429	AGTTATGAAGCTCGTGCATTT
POLH	CDS	5429	AGAACACATGGACTATCATTT
POLH	CDS	5429	GCTTATTTCAATGGCTCGATT
POLK	3UTR	51426	GCATTGATCCTAGTGTCTTTA
POLK	CDS	51426	GCCATTGCTAAGGAATTGCTA
POLK	CDS	51426	CAGTTAATCAACCCAAAGAAA
POLQ	CDS	10721	CGGGCCTCTTTAGATATAAAT
POLQ	CDS	10721	GCTGACCAAGATTTGCTATAT
POLQ	CDS	10721	CCTTCAATCTTGCTTGCGAAA
POLL	CDS	27343	TGGTGCCCTATAGCGAGTTTG
POLL	CDS	27343	TGTGTGGCATGTGGTTCATAC
POLL	CDS	27343	ACTCACATTGTGGTGGATGAA
POLE	CDS	5426	GCTGACCAGTTGGACAACATT
POLE	CDS	5426	GCAGTGGATTACTACTTTATT
POLE	CDS	5426	CCTGTGTAAAGACTCTTCCTT
POLA1	CDS	5422	GCTGGTGAGAAGTATAAATAT
POLA1	CDS	5422	TCGCTGGTTGTGCCGTGAAAT
POLA1	3UTR	5422	GCCAATTAAACCCGGTCTAAA
PARP2	CDS	10038	ACTATCTGATTCAGCTATTAG
PARP2	CDS	10038	TCTGAATCCAGATGGTTATAC
PARP2	CDS	10038	CTCCGTACTCCTCCACTAATC
OGG1	CDS	4968	CGGCTCATCCAGCTTGATGAT
OGG1	CDS	4968	CGGATCAAGTATGGACACTGA
OGG1	CDS	4968	TGTGCCCGTGGATGTCCATAT
NTHL1	CDS	4913	GCACGAGATCAATGGACTCTT
NTHL1	CDS	4913	GAGCAAGGTGAAATACATCAA
NTHL1	CDS	4913	GATGCTCTCCAGCCAAACCAA
POLG	CDS	5428	GCGCTTACTAATGCAGTTTAA
POLG	CDS	5428	TTCTGGAGGAACGCCCATAAA
POLG	CDS	5428	CCTGCAAGAATTTAAGCAGAA
POLD1	CDS	5424	CGGTTACAACATCCAGAACTT
POLD1	CDS	5424	CCTGCCCATTGACACGCAGTA
POLD1	CDS	5424	CCTGGCACTGATGGAGGAGAT
POLG2	CDS	11232	GCATTTCTTGAGAACGTATTA
POLG2	CDS	11232	CCTGGCAATGTGTCTAAATTA
POLG2	CDS	11232	GCCTTGGAACACTATGTTAAT
PMS2P5	CDS	5383	CCATTTCTACCTGCCACGTAT
PMS2P5	CDS	5383	CGACTGGTGTTTGATCACGAT
PMS2P5	CDS	5383	GTCAGCGTGAAGCAGTTATTT
PNKP	CDS	11284	GAAGCGTATGCGGAAGTCAAA
PNKP	CDS	11284	GTGTCAGACATGGTCATGTAT
PNKP	CDS	11284	AGTGAAACAGCTGGGAGTTAA
PER1	CDS	5187	CAGCACCACTAAGCGTAAATG
PER1	CDS	5187	CCTTGGTGCTCCCTAACTATC
PER1	3UTR	5187	TGAAGTGGCCTCTCCATATTC
NHEJ1	3UTR	79840	TACCATGGACTTTAGGTATAT
NHEJ1	CDS	79840	ATTCCTTCTTGGAACAATTTA
NHEJ1	CDS	79840	GCTAGCAACGTTACTTCATAT
POLM	3UTR	27434	TGGCTCTTCCGGAGGTCAATT
POLM	CDS	27434	GACCCGGAGCAGAAGACATTT
POLM	CDS	27434	GAAGGACTGCGAACCTTAGAT
POLE2	CDS	5427	AGATGTTTCGTGAGCGATATA
POLE2	CDS	5427	GTCCAACTAGACCTTAGTAAA
POLE2	CDS	5427	CCGTGAAGACTTAGTAAATAA
PCNA	CDS	5111	GAAGCACCAAACCAGGAGAAA
PCNA	CDS	5111	GATGCTGTTGTAATTTCCTGT
PCNA	CDS	5111	ACGTCTCTTTGGTGCAGCTCA
NPM1	CDS	4869	GCGCCAGTGAAGAAATCTATA
NPM1	CDS	4869	GTTCAGGGCCAGTGCATATTA
NPM1	CDS	4869	CCTAGTTCTGTAGAAGACATT
PMS1	CDS	5378	GGACCATTACCTAGTACAAAT
PMS1	CDS	5378	GGAACGATACAATAGTCAAAT
PMS1	3UTR	5378	TGAAATTGGTTCTGTCATAAA
PARP3	CDS	10039	ACCCGCAGAGAAGCGCATAAT
PARP3	3UTR	10039	GTACAAGATCCCTGAACTTAT
PARP3	CDS	10039	CCAGACCAACATCGAGAACAA
NUDT1	CDS	4521	CCTGCTTCAGAAGAAGAAATT
NUDT1	CDS	4521	CCTGAGCTCATGGACGTGCAT
NUDT1	CDS	4521	CGAGTTCTCCTGGGCATGAAA
PMS2	CDS	5395	GGACTATGGAGTGGATCTTAT
PMS2	CDS	5395	CACCTCAGACTCTCAACTTAA
PMS2	CDS	5395	TGATTCAGAATGCGTTGATAT
PARG	CDS	8505	GCTGAGCGAGATGTGGTTTAT
PARG	CDS	8505	GCTAAGATGAAATCGGAGTAT
PARG	CDS	8505	GCCTAGGAAATTCTCCTCCAT
PARP1	CDS	142	CGACCTGATCTGGAACATCAA
PARP1	CDS	142	GCAGCTTCATAACCGAAGATT
PARP1	CDS	142	CCGAGAAATCTCTTACCTCAA
POLB	CDS	5423	CCTGTCAAAGGGTGAGACAAA
POLB	CDS	5423	CCAGCTTCACTTCAGAATCAA
POLB	CDS	5423	GCTAAGAAATTGCCTGGAGTA
POLI	CDS	11201	TCGGGTCATGTATACAATAAT
POLI	3UTR	11201	GATATTCAATAACGGAGTAAA
POLI	CDS	11201	AGAGTCGTCAGTGCCCTATTC
PALB2	CDS	79728	GGCCTTTCTTCATCCATATTA
PALB2	CDS	79728	GACTTAGAAGAGGACCTTATT
PALB2	CDS	79728	GATGCACATTGATGATTCTTA
RAD17	CDS	5884	GCCCTCTCATTTATCAGAATA
RAD17	CDS	5884	CCCAGCTTAATGGAGGACATT
RAD17	CDS	5884	CGCTCTTTACTCAGGGAATAT
RAD1	CDS	5810	CAAGCCTTATTTCAGGTTATC
RAD1	CDS	5810	GCCACGTGTTTCGCAACTAAA
RAD1	CDS	5810	TGCAGCACCAATGTTATTAAT
RAD50	CDS	10111	CGCCTAAAGAACGACATAGAA
RAD50	CDS	10111	TCCATTGAAGAATCGTCTAAA
RAD50	CDS	10111	ATCCGAGCTAGAGATTCATTA
RAD23B	CDS	5887	CCAGCGTTACTACAGCAGATA
RAD23B	CDS	5887	CAGCAGATAGGTCGAGAGAAT
RAD23B	CDS	5887	CTCCAGCATCAGCGACAGCAT
RECQL4	CDS	9401	CCTCGATTCCATTATCATTTA
RECQL4	CDS	9401	CTAGGAAGAGCCTCATCTAAG
RECQL4	CDS	9401	GGCTCAAGGCCAATCTGAAAG
RECQL	CDS	5965	GCCCTCAAACACTGAAGATTT
RECQL	CDS	5965	GCACATGCTATTACTATGCAA
RECQL	CDS	5965	GCCAATGAAATTCAGGTAGTA
REV3L	CDS	5980	GCTAAACCAATGAACTATATT
REV3L	CDS	5980	GCTGAGTTTGAGGGAGACTTT
REV3L	CDS	5980	TGACCTGTCTGAGACTATTTA
RECQL5	CDS	9400	CTGTAATTGTTGCAACCATTA
RECQL5	CDS	9400	TTGTCGCCCATTGGAATATTG
RECQL5	CDS	9400	CCCTAAAGGTACGAGTAAGTT
RAD51B	CDS	5890	TTGACACAGAGTCTGCATTTA
RAD51B	CDS	5890	GCAAACGGCTTATGGGATAAA
RAD51B	CDS	5890	GGCATCCTCCTTGAAGTATTT
RAD51D	3UTR	5892	CCTGTGCTGTTGTTTGGGAAA
RAD51D	CDS	5892	CTGGAAGAGGTAGCTCAGAAA
RAD51D	3UTR	5892	CCACGTTTCCTTCCCTTATTT
RAD51C	CDS	5889	AGCATACCCAGGGCTTCATAA
RAD51C	CDS	5889	CAGAAGAGAATGTCTCACAAA
RAD51C	CDS	5889	GTTGGGATATCTAAAGCAGAA
RAD52	CDS	5893	CCACCAGAAACCACAAGCAAA
RAD52	CDS	5893	GCACAACAGGAAACTGGGAAT
RAD52	CDS	5893	CAGCTGAAGGATGGTTCATAT
RAD51	CDS	5888	CGGTCAGAGATCATACAGATT
RAD51	CDS	5888	CGCCCTTTACAGAACAGACTA
RAD51	CDS	5888	GCTGAAGCTATGTTCGCCATT
RBBP8	CDS	5932	CGTCAGCCTTACAACGCAATA
RBBP8	CDS	5932	CGGCAGCAGAATCTTAAACTT
RBBP8	3UTR	5932	CAGAAGGATGAAGGACAGTTT
RAD23A	3UTR	5886	CCCTACCCTTATTCCATGAAA
RAD23A	CDS	5886	GCAGACCTTCAAGATCCGCAT
RAD23A	CDS	5886	AGGCCTATTTCGCGTGTGAAA
PRMT6	CDS	55170	CACCGGCATTCTGAGCATCTT
PRMT6	CDS	55170	GCGAACCAAGTGGCTGAAGGA
PRMT6	CDS	55170	CACGGACGTTTCAGGAGAGAT
PRPF19	CDS	27339	GACTTGAAGGAACGTACTAAT
PRPF19	CDS	27339	CCTCAAGTTCTACAGCCTGTA
PRPF19	3UTR	27339	GAACGGATGTGGAAGGAAGAA
PRKDC	CDS	5591	CCATCCCTTATAGGTTAATAT
PRKDC	3UTR	5591	GAAACAGCTGTCTCCGTAAAT
PRKDC	CDS	5591	CCTGAAGTCTTTACAACATAT
RDM1	CDS	201299	GAAGGGTATCTCTCGGATTTC
RDM1	CDS	201299	GGTGGAGGAAGGACCATTATC
RDM1	CDS	201299	CATTCTCTGTTCACAGCATTT
RASSF7	CDS	8045	CCTCACCTATGGCATCTGCCA
RASSF7	CDS	8045	CCCATGCTGGTGCCCAGCCTA
RASSF7	CDS	8045	CCAGGCCACCTGCGGACAGTT
RAD9A	CDS	5883	TGCCTTGGAGAGGAGGATTTC
RAD9A	CDS	5883	CCCGCTCTTCTTCCAGCAATA
RAD9A	3UTR	5883	GATACTCTTTGGCGCTGACTT
RNF168	CDS	165918	GCAGTCAGTTAATAGAAGAAA
RNF168	CDS	165918	CGTGGAACTGTGGACGATAAT
RNF168	CDS	165918	CCGAAGAAATTCTCTCGTCAA
PRKCG	CDS	5582	GCTTTGTGGTTCATCGACGAT
PRKCG	3UTR	5582	CCTGTCCCATTCTAGATCCTG
PRKCG	3UTR	5582	GCCTCCACTCTAGTTCTAGAT
REV1	CDS	51455	CGGTGGAATCGGTTTGGAATA
REV1	CDS	51455	CGCAAGCAAATGGAATTGATT
REV1	3UTR	51455	CATAAGTGCTTGTGAGGTATT
RNF8	CDS	9025	TGGAGCAACTAGAGAAGACTT
RNF8	CDS	9025	CCAAAGAATGACCAAATGATA
RNF8	CDS	9025	GAAGCCGTTATGAATGTGAAA
RAD21	CDS	5885	GCTGAATCTATCAGTTTGCTT
RAD21	CDS	5885	GCTAATTGTTGACAGTGTCAA
RAD21	3UTR	5885	CCAGATAGCATCAGAAATCAT
RAD54L	3UTR	8438	TGGTCTGGGTGTAGCTCTTAG
RAD54L	CDS	8438	AGATGCTGGTCCTGGATTATA
RAD54L	CDS	8438	CCAGAGTGCAAGCCAGAAATT
PAPD7	CDS	11044	CGGATCGAAACTGTGGTGAAA
PAPD7	CDS	11044	CCGTGTTCCATCAAAGTCCTT
PAPD7	CDS	11044	GCAGCTTTAGTACAGGTCTTT
RAD18	CDS	56852	TGCTTCGAGTATTTCAACATT
RAD18	3UTR	56852	GCCCAAGGAAAGATGCTAAAT
RAD18	CDS	56852	GAACCAAGAAACAAGCGTAAT
RAD54B	CDS	25788	GCAGATTGTTGATGGCTTTAA
RAD54B	CDS	25788	GCTTTATCGAAAGCTGTTAAA
RAD54B	3UTR	25788	GACATTCCATTGCTCTTCTTT
SMUG1	3UTR	23583	CCAAGACAAAGCATGGGACAT
SMUG1	CDS	23583	CATCATCTACAATCCCGTGGA
SMUG1	CDS	23583	CAGCTTCTTGGGATCTGTGAT
SPO11	CDS	23626	GAGTGTACTTACCTAACAAAT
SPO11	CDS	23626	GCATCTATAAGTATGGATCTA
SPO11	CDS	23626	CGGCTCCTAGATGACAACTTT
RPA4	3UTR	29935	GCATCCAGCTGTGAGTAATTT
RPA4	CDS	29935	ACGATGAGAGTCACCGCAATT
RPA4	CDS	29935	GTCGTGATACCACTGTAGAAA
RPA1	3UTR	6117	GCGGCTACAAAGCGTTTCTTT
RPA1	CDS	6117	CCCTAGAACTGGTTGACGAAA
RPA1	CDS	6117	CGACACCGAATTTCCCAATTT
RPAIN	3UTR	84268	GCTTGGACTCACATCATTCTA
RPAIN	CDS	84268	GAATGCTTTGCAGTCAGTGGA
RPAIN	CDS	84268	CAGAACAGCTTTCTAGTTCAA
SOD1	CDS	6647	AGCAGATGACTTGGGCAAAGG
SOD1	CDS	6647	GTGGAAATGAAGAAAGTACAA
SOD1	3UTR	6647	GCTGTAGAAATGTATCCTGAT
RPA3	CDS	6119	GATCTTGGACTTTACAATGAA
RPA3	CDS	6119	GCTAGCTCAATTCATCGACAA
RPA3	CDS	6119	GTACATCTTATGTCCAGTTTA
TP53BP1	3UTR	7158	GATACTTGGTCTTACTGGTTT
TP53BP1	CDS	7158	CCCTTGTTCAGGACAGTCTTT
TP53BP1	CDS	7158	GATACTCCTTGCCTGATAATT
SMC3	CDS	9126	CATCTAGAGATAGCATATTAT
SMC3	CDS	9126	GTACTGGTCCTCGTGTTATTT
SMC3	CDS	9126	GTACTTGAACTTCGGAAATAT
TCEA1	CDS	6917	ATAGAGTACGAAGTAGGATAT
TCEA1	CDS	6917	AGAAGAAAGAACCTGCAATTA
TCEA1	CDS	6917	CGGAATGTCAGTTAATGCTAT
RPA2	CDS	6118	CCAGGTGTTGAATTTGATTAA
RPA2	3UTR	6118	AGTAGGTTTCATCTATCAAAT
RPA2	3UTR	6118	GCTTGTTACAACATCAAGATA
SEM1	CDS	7979	GCTGAACTAGAGAAACATGGT
SEM1	3UTR	7979	CCAGAAGAAGTGTTGAAGTAA
SEM1	CDS	7979	GCTGGCTTAGATGAAGATGAA
SMC6	CDS	79677	AGATGGAAGTCGATCTTATAA
SMC6	3UTR	79677	CACCCTACCAAGAGCTTATAA
SMC6	CDS	79677	ACCTCACGGCCACCGATAATA
TNP1	CDS	7141	CGATGACGCCAATCGCAATTA
TNP1	3UTR	7141	GCCTATGGAATGTGGATCAAA
TNP1	CDS	7141	CAAGAGCCGATCTCCTCACAA
TDG	CDS	6996	GAACGAAATATGGACGTTCAA
TDG	CDS	6996	TTTCGTGAAGGAGGACGTATT
TDG	CDS	6996	GATGGCTGAAGCTCCTAATAT
SIRT1	CDS	23411	CAGGTCAAGGGATGGTATTTA
SIRT1	CDS	23411	CATGAAGTGCCTCAGATATTA
SIRT1	CDS	23411	GCGGCTTGATGGTAATCAGTA
RPS27L	3UTR	51065	GTTGTCTCACAGAAAGCCTTA
RPS27L	CDS	51065	CAGTGGTTCTTTGTGTAGGTT
RPS27L	CDS	51065	AGGGTGTTCATTTAGAAGAAA
RTEL1	CDS	51750	CCTGATCTTCTTCCCTTCCTA
RTEL1	CDS	51750	CCAACAGGAGTACATGACCAA
RTEL1	CDS	51750	CCGTACAATTACTTGTTGGAT
SMC1A	CDS	8243	CCAACATTGATGAGATCTATA
SMC1A	CDS	8243	CGACAGATTATCGGACCATTT
SMC1A	CDS	8243	GCCGGGACTGTATTCAGTATA
SETX	CDS	23064	CCTTCGTTAAAGAGGTCTTAA
SETX	CDS	23064	CATCCTCAGTCTCCGAATAAT
SETX	CDS	23064	CGGCAGAAGGATTGTGTTATT
RRM2B	CDS	50484	GCGATGGATAGCAGATAGAAA
RRM2B	CDS	50484	GCAGCCAGTGATGGAATTGTA
RRM2B	CDS	50484	CCGGTTTGTCATCTTTCCAAT
TADA3	CDS	10474	GCTGTGGCTGACAAGAAGAAA
TADA3	CDS	10474	CCCAAGAAGCAGAAACTGGAA
TADA3	CDS	10474	TTCAGTGTGCCGCATACTAAG
RUVBL2	CDS	10856	CGAGAAAGACACGAAGCAGAT
RUVBL2	CDS	10856	CCGTGATGTAACAAGGATTGA
RUVBL2	CDS	10856	TCCAGATTGATCGACCAGCAA
RRM2	CDS	6241	CGGAGGAGAGAGTAAGAGAAA
RRM2	CDS	6241	GCAGACAGACTTATGCTGGAA
RRM2	CDS	6241	GCTCAAGAAACGAGGACTGAT
TDP1	CDS	55775	GCGGACCAGTTTAGAAGGATA
TDP1	CDS	55775	GCACGATCTCTCTGAAACAAA
TDP1	CDS	55775	CCGATGAATCAAAGTGGTTAT
TOPBP1	CDS	11073	GCTGCAAAGAAGTGGAATTTA
TOPBP1	CDS	11073	CCCTTTAATGATTCTACTCAT
TOPBP1	CDS	11073	GCGTAAGTGAATCAATATGTA
TDP2	CDS	51567	CAACTGATTCCACCACTTCTA
TDP2	CDS	51567	AGGATATTTCACAGCTATAAT
TDP2	CDS	51567	CCTAAAGAAGAGATCAAGTAA
TP53	CDS	7157	CACCATCCACTACAACTACAT
TP53	CDS	7157	GTCCAGATGAAGCTCCCAGAA
TP53	CDS	7157	CGGCGCACAGAGGAAGAGAAT
TOP2A	3UTR	7153	GCCCAAGTGTTCTTTAGCTTT
TOP2A	CDS	7153	GCCTGATTTGTCTAAGTTTAA
TOP2A	CDS	7153	GCTCCAAATCAATATGTGATT
SETMAR	CDS	6419	CAAGTGTTCAAGACGCATAAA
SETMAR	CDS	6419	CGCAACATCAACAATGCATTT
SETMAR	CDS	6419	GAAAGGCTAGATCATGGGAAA
TP73	CDS	7161	CCAAGGGTTACAGAGCATTTA
TP73	3UTR	7161	CTCTCCTTCCTGTGTGTCCAA
TP73	CDS	7161	CCCGCTCTTGAAGAAACTCTA
UBE2B	CDS	7320	CGGGATTTCAAGCGGTTACAA
UBE2B	CDS	7320	GCAGTTATATTTGGACCAGAA
UBE2B	3UTR	7320	GCATGGTGTGAACTAAGTTAT
USP1	3UTR	7398	GCTCGTATTTGTATTCTCCAT
USP1	CDS	7398	CCAGAGACAAACTAGATCAAA
USP1	CDS	7398	GCTAGTGGTTTGGAGTTTGAT
UVRAG	CDS	7405	GCCCTTGGTTATACTGCACAT
UVRAG	3UTR	7405	ACTTAACCCTTTGTGATAATG
UVRAG	CDS	7405	CACGTGGCGAAGTCTCGATTT
ATP23	CDS	91419	TGCCAGAATAATATCCATAAT
ATP23	CDS	91419	GACTGCTCACTTGTCAATGAA
ATP23	3UTR	91419	GACTGTGATTCTAGCATATTA
XRCC4	CDS	7518	CCTCAGGAGAATCAGCTTCAA
XRCC4	CDS	7518	TGTGTGAGTGCTAAGGAAGCT
XRCC4	CDS	7518	CCAGCTGATGTATACACGTTT
UNG	CDS	7374	GTCTACAGACATAGAGGATTT
UNG	CDS	7374	TGATAGGAAGCGGCACCATGT
UNG	CDS	7374	GCAGTTGTGTCCTGGCTAAAT
XRCC5	CDS	7520	AGAGGAAGCCTCTGGAAGTTC
XRCC5	CDS	7520	CGTGGGCTTTACCATGAGTAA
XRCC5	CDS	7520	CCTCATATCAAGCATAACTAT
XRCC6	CDS	2547	GATGAGTCATAAGAGGATCAT
XRCC6	CDS	2547	CCCAAGGTTGAAGCAATGAAT
XRCC6	3UTR	2547	GAAGAGTCTACCCGACATAAG
TREX2	CDS	11219	TGGCCCACAATGGCTTTGATT
TREX2	CDS	11219	ATTGCCGAGCTGTCCCTCTTT
TREX2	CDS	11219	ATCTGCCTTGTGGCCCACAAT
TREX1	CDS	11277	CAAGGATCTTCCTCCAGTGAA
TREX1	CDS	11277	AGCATCTACACTCGCCTGTAT
TREX1	CDS	11277	CCAAGGAAGAGCTACAGCCTA
XRCC3	CDS	7517	CTTGTTGGAGTGTGTGAATAA
XRCC3	3UTR	7517	GCCTGCTTCTTCTCTCCATAT
XRCC3	CDS	7517	GTTCTGGGACGAACGTGTTTC
XRCC2	CDS	7516	TGCAACGACACAAACTATAAT
XRCC2	CDS	7516	TGATATGCTCCGGCTAGTTAC
XRCC2	3UTR	7516	ATGAGACCACACACCTATAAT
UBE2N	CDS	7334	AGACAAGTTGGGAAGAATATG
UBE2N	CDS	7334	CCATAGAAACAGCTAGAGCAT
UBE2N	CDS	7334	CCTTCCAGAAGAATACCCAAT
UBE2A	CDS	7319	GTCTATGCAGATGGTAGTATA
UBE2A	3UTR	7319	ACCTCCCTACTCCTGTCATTA
UBE2A	CDS	7319	AGAACAAAGCTGGCGTGATTG
XPC	CDS	7508	TGAGGAATTGGTCCATATATT
XPC	CDS	7508	GCAACAGCAAAGGGAAAGAAA
XPC	CDS	7508	CCCACTGCCATTGGCTTATAT
TYMS	CDS	7298	CCCTGACGACAGAAGAATCAT
TYMS	CDS	7298	GCTGACAACCAAACGTGTGTT
TYMS	CDS	7298	CAGGTGACTTTATACACACTT
UBE2V2	3UTR	7336	GTCTTAAATCAACAACCTTCT
UBE2V2	CDS	7336	GCTCCTCCGTCAGTTAGATTT
UBE2V2	CDS	7336	CAAGGTGGACAGGCATGATTA
TRIM28	CDS	10155	CTGAGACCAAACCTGTGCTTA
TRIM28	3UTR	10155	CCTGGCTCTGTTCTCTGTCCT
TRIM28	CDS	10155	GACCACCAGTACCAGTTCTTA
TRIP13	CDS	9319	GCAGTGGACAAGCAGTTTGAA
TRIP13	CDS	9319	GCTACTCAACAGACATAATAT
TRIP13	CDS	9319	GCACTGTTGCACTTCACATTT
YBX1	CDS	4904	AGCAGACCGTAACCATTATAG
YBX1	CDS	4904	CCAGTTCAAGGCAGTAAATAT
YBX1	CDS	4904	CGTAACCATTATAGACGCTAT
XAB2	CDS	56949	GCCTCGTCTGTGGCTAGATTA
XAB2	CDS	56949	TCACGCAGCACTCTCGAATTT
XAB2	CDS	56949	GCCCAGGCTCAATCAGCTATA
UIMC1	3UTR	51720	ATAGTGGTCCCTAGTTCATTG
UIMC1	CDS	51720	TGAGAAGGAAGTAGCTATTTC
UIMC1	CDS	51720	CCATTGCTGAAAGCCTGAATA
XPA	CDS	7507	CATGAGTATGGACCAGAAGAA
XPA	CDS	7507	GCATTAGAAGAAGCAAAGGAA
XPA	CDS	7507	GTGATATGAAACTCTACTTAA
VCP	CDS	7415	ACCGTCCCAATCGGTTAATTG
VCP	CDS	7415	AGATCCGTCGAGATCACTTTG
VCP	3UTR	7415	ATATAGAGAGTAGGTTGATTT
XRCC1	CDS	7515	CCAGTGCTCCAGGAAGATATA
XRCC1	CDS	7515	AGTCAGAAGGACAGGACAATG
XRCC1	CDS	7515	TCCAGGGCAAGCACTTCTTTC
WRN	CDS	7486	CCTGTTTATGTAGGCAAGATT
WRN	CDS	7486	GAGGGTTTCTATCTTACTAAA
WRN	CDS	7486	TACTTAGCGACATGAACAAAC
UBE2V1	CDS	7335	CGCCTAATGATGTCTAAAGAA
UBE2V1	CDS	7335	AGGACAGTGTTACAGCAATTA
UBE2V1	CDS	7335	GCAAACTGAGTGATGAAGGAA
UPF1	CDS	5976	AGATGCAGTTCCGCTCCATTT
UPF1	CDS	5976	AGATATGCCTGCGGTACAAAG
UPF1	CDS	5976	TTACCTTGGTGACGAGTTTAA
