# Supplementary material for: Cell-based cccDNA reporter assay combined with functional genomics identifies YBX1 as HBV cccDNA host factor and antiviral candidate target
Source: Gut. 2022 Dec 9;72(9):1745–57. doi: 10.1136/gutjnl-2020-323665 (PMC10423543; doi:10.1136/gutjnl-2020-323665)
Supplement: Supplementary data [file gutjnl-2020-323665supp002.xlsx]

## Sheet: Screen data
Supplementary Table S2: Screen data
Public ID		Symbol		ELISA R1	ELISA R2	ELISA R3	MEAN	SD		ratio to pLKO R1	ratio to pLKO R2	ratio to pLKO R3	MEAN	SD		Viability ratio to pLKO R1	Viability ratio to pLKO R2	Viability ratio to pLKO R3	MEAN	SD
TRCN0000121277		ABL1		22441728	20925560	21259680	2.15423e+07	796622		0.9853	1.22034	1.394	1.19988	0.205116		0.881161	0.927124	1.11942	0.975902	0.126398
TRCN0000121279		ABL1		12886928		16069056	14477992	2.2501e+06		1.06369		1.02029	1.04199	0.0306898		1.03096	0.972611	0.950356	0.984643	0.0416281
TRCN0000288588		ABL1		16685696	18066928	19049856	17934160	1.18766e+06		1.37724	2.55369	1.20955	1.71349	0.732443		1.05765	0.944494	0.972139	0.991427	0.0589921
TRCN0000122051		ABRAXAS1		17280496	12489616	13780800	1.4517e+07	2.47883e+06		0.880332	0.97651	0.790624	0.882489	0.0929614		1.10957	0.97015	1.03908	1.0396	0.0697115
TRCN0000416367		ABRAXAS1		14462680	12122288	18443512	1.50095e+07	3.19589e+06		0.736782	0.94779	1.05813	0.914234	0.163281		1.03945	0.923904	0.981063	0.981474	0.057776
TRCN0000426063		ABRAXAS1		28880176	26431696	29899608	2.84038e+07	1.78235e+06		1.47126	2.06658	1.71538	1.75108	0.29926		1.02827	0.862643	0.897377	0.929432	0.0873447
TRCN0000235017		ALKBH1		6263456	7116888	6336168	6.57217e+06	473138		0.516988	1.00594	0.402309	0.641747	0.320573		1.02518	0.982813	0.975559	0.994516	0.0267989
TRCN0000235019		ALKBH1		17365456	17875320	17589904	1.76102e+07	255539		1.43335	2.5266	1.11685	1.69227	0.739681		0.901439	0.918416	0.875127	0.898327	0.0218115
TRCN0000235018		ALKBH1		23136176	25965056	26634848	25245360	1.85705e+06		1.90967	3.67006	1.69116	2.42363	1.08495		0.900017	0.846877	0.91741	0.888101	0.0367451
TRCN0000064678		ALKBH2		14210576	11242784	10446488	11966616	1.98369e+06		0.623913	0.65566	0.684977	0.65485	0.0305401		0.982638	0.993532	1.02264	0.999604	0.020682
TRCN0000064680		ALKBH2		24669872	22207904	20437072	2.24383e+07	2.12578e+06		1.08313	1.29513	1.34006	1.23944	0.137221		0.831046	0.909312	1.00671	0.915689	0.0880055
TRCN0000447884		ALKBH2		8760704	11769152	11764024	1.07646e+07	1.73545e+06		0.723112	1.66352	0.746946	1.04453	0.536198		0.983872	0.924853	0.98392	0.964215	0.0340884
TRCN0000434811		ALKBH3		16072016	15242192	12307448	14540552	1.97793e+06		0.705639	0.888898	0.807	0.800513	0.0918016		0.90774	0.983379	1.07626	0.989127	0.0844076
TRCN0000064749		ALKBH3		20389800	19354864	17367032	19037232	1.53621e+06		0.895211	1.12874	1.13876	1.05424	0.137812		0.89136	0.909635	1.05238	0.951125	0.0881646
TRCN0000430074		ALKBH3		29476888	29298080	28127064	28967344	733175		1.29418	1.70861	1.84429	1.61569	0.286587		0.837368	0.946732	1.14947	0.977858	0.158364
TRCN0000352783		APEX1		18025776	10687616	14514312	1.44092e+07	3.67021e+06		0.791419	0.623283	0.951704	0.788802	0.164226		1.0117	1.01056	1.18129	1.06785	0.0982441
TRCN0000342686		APEX1		16404712	16943160	17902984	1.70836e+07	758947		0.720246	0.988096	1.1739	0.960747	0.22806		0.912844	1.06093	1.17143	1.0484	0.129749
TRCN0000011214		APEX1		27442960	26903944	24838560	2.63952e+07	1.37473e+06		1.20488	1.56899	1.62867	1.46751	0.229396		0.977825	0.996518	1.09384	1.02273	0.0622929
TRCN0000049662		APEX2		4573296	6968000	6174752	5.90535e+06	1.21987e+06		0.377482	0.984899	0.39206	0.584813	0.346561		1.02428	0.961953	0.945508	0.977246	0.0415506
TRCN0000049658		APEX2		5065080	6577456	6530672	6057736	859984		0.418074	0.929697	0.414659	0.587476	0.296376		0.949955	0.929859	0.929474	0.93643	0.0117148
TRCN0000049659		APEX2		18159416	18778368	19571136	1.88363e+07	707641		1.49888	2.65425	1.24265	1.79859	0.75201		1.03296	0.941402	0.984001	0.98612	0.0458142
TRCN0000144122		APLF		18809176	14285104	16438584	1.6511e+07	2.2629e+06		0.825814	0.833082	1.07788	0.912258	0.143478		0.990556	1.02859	1.09966	1.0396	0.0553771
TRCN0000167011		APLF		19758696	19059160	19640872	1.94862e+07	374527		0.867502	1.1115	1.28785	1.08895	0.211081		0.890945	0.964887	1.12594	0.993925	0.12016
TRCN0000121568		APLF		9243288	6261160	6753520	7.41932e+06	1.59867e+06		0.762944	0.88499	0.428809	0.692248	0.236165		1.00906	0.868262	0.857954	0.911758	0.0844209
TRCN0000294489		APTX		4217888	4985768	6612464	5272040	1.22269e+06		0.348146	0.704718	0.419852	0.490905	0.188606		1.05219	0.977268	0.973576	1.00101	0.0443607
TRCN0000294491		APTX		16180928	19501032	19890288	1.85241e+07	2.03854e+06		1.33558	2.75639	1.26292	1.78496	0.842067		1.04834	0.985264	0.986045	1.00655	0.0361917
TRCN0000294490		APTX		22751952	23656664	21949144	22785920	854267		1.87795	3.34377	1.39364	2.20512	1.0154		1.01593	0.965229	0.951719	0.977627	0.0338556
TRCN0000074271		ASF1A		6092240	7065240	8577864	7.24511e+06	1.25254e+06		0.502856	0.998643	0.544644	0.682047	0.274975		0.946575	0.923708	0.92459	0.931624	0.0129554
TRCN0000074272		ASF1A		15237928	14379664	14363664	1.46604e+07	500202		1.25774	2.03251	0.912008	1.40075	0.573776		0.982642	0.920787	0.953332	0.952254	0.0309418
TRCN0000074270		ASF1A		13986880	17011712	15652304	1.55503e+07	1.51499e+06		1.15448	2.40454	0.993829	1.51762	0.772285		1.04393	0.986101	1.00715	1.01239	0.0292681
TRCN0000013713		ATF2		14810792	12541624	13869616	1.37407e+07	1.14007e+06		0.650265	0.731406	0.909432	0.763701	0.132567		0.951834	1.01782	1.13806	1.03591	0.0944225
TRCN0000218254		ATF2		24507560	15796784	14026616	18110320	5.61043e+06		1.076	0.921241	0.919726	0.972323	0.0897908		1.01503	1.02171	1.08448	1.04041	0.0383127
TRCN0000229648		ATF2		19412096	22440648	21814448	2.12224e+07	1.59873e+06		1.60228	3.17189	1.38509	2.05309	0.974982		1.00871	0.930134	0.998	0.978947	0.0426108
TRCN0000039948		ATM		10918360	9098904	6412760	8810008	2.26665e+06		0.479369	0.530632	0.420485	0.476829	0.0551175		1.02799	1.00319	1.0422	1.02446	0.0197405
TRCN0000194861		ATM		31179152	28564776	28728168	2.94907e+07	1.46452e+06		1.36892	1.66585	1.88371	1.63949	0.258406		0.952521	0.987795	1.04537	0.995228	0.0468684
TRCN0000194969		ATM		18305912	22581008	22053600	2.09802e+07	2.33094e+06		1.51098	3.19173	1.40027	2.03433	1.00387		1.02317	0.967851	1.00711	0.999374	0.0284566
TRCN0000359024		ATP23		13126768	9459272	7667624	1.00846e+07	2.78277e+06		0.931674	0.722849	0.548961	0.734495	0.191622		1.09633	0.982395	0.85488	0.977868	0.120787
TRCN0000135720		ATP23		28483200	24030816	20498392	2.43375e+07	4.00123e+06		2.0216	1.83636	1.46758	1.77518	0.282034		1.17849	0.975814	0.967205	1.0405	0.119579
TRCN0000359023		ATP23		33125080	32625672	31820400	3.25237e+07	658288		2.35106	2.49316	2.27817	2.37413	0.109334		1.05295	0.989914	0.875252	0.972706	0.0900907
TRCN0000039615		ATR		12884368	13204528	12636448	12908448	284805		0.565686	0.770065	0.828573	0.721441	0.138024		0.94204	1.00183	1.10285	1.01557	0.0812794
TRCN0000344499		ATR		14320320	14067984	16650664	1.5013e+07	1.42387e+06		0.628731	0.82042	1.09179	0.846979	0.232667		0.951516	0.98892	1.16913	1.03652	0.116357
TRCN0000219647		ATR		24812456	25222712	25833424	2.52895e+07	513753		1.08939	1.47094	1.6939	1.41808	0.305704		0.947992	1.01504	1.14786	1.03696	0.10172
TRCN0000282360		ATRIP		9460768	7959640	7757496	8.39263e+06	930536		0.415373	0.464192	0.50866	0.462742	0.04666		0.958907	1.036	1.13938	1.04476	0.0905568
TRCN0000262649		ATRIP		17950288	20482112	19857072	19429824	1.31888e+06		0.788104	1.19448	1.30203	1.09487	0.271056		0.940337	0.963333	1.13726	1.01364	0.107673
TRCN0000282359		ATRIP		23531688	24527784	25250960	2.44368e+07	863239		1.03315	1.43042	1.65571	1.37309	0.31521		0.780612	0.844931	0.964059	0.8632	0.0930779
TRCN0000013592		ATRX		22654688	20450712	18226096	20443832	2.2143e+06		0.99465	1.19265	1.19509	1.12746	0.115025		0.996456	1.07512	1.10842	1.06	0.0574929
TRCN0000013590		ATRX		23569664	19801464	22692216	2.20211e+07	1.9717e+06		1.03482	1.15479	1.48793	1.22585	0.234763		0.932886	1.01197	1.11163	1.01883	0.0895694
TRCN0000342811		ATRX		19069616	22146312	23898888	2.17049e+07	2.4447e+06		1.57401	3.13029	1.51744	2.07391	0.915287		1.01274	0.967813	0.978655	0.986403	0.0234448
TRCN0000430436		ATXN3		19721856	7492752	8778968	1.19979e+07	6.72002e+06		0.865885	0.436964	0.575638	0.626162	0.218878		1.05936	1.03455	1.10687	1.06693	0.0367455
TRCN0000430819		ATXN3		20973648	17256304	19043952	1.90913e+07	1.85912e+06		0.920845	1.00636	1.24871	1.05864	0.170072		0.969616	1.02902	1.07668	1.0251	0.0536398
TRCN0000007405		ATXN3		18096792	23394368	21895208	2.11288e+07	2.73068e+06		1.49372	3.3067	1.39022	2.06354	1.07785		1.02691	1.015	0.967162	1.00302	0.0316232
TRCN0000221084		BABAM2		16976776	16729456	13828648	15844960	1.75055e+06		0.745363	0.975633	0.906745	0.875914	0.118191		0.89839	0.932557	1.07819	0.969713	0.0954859
TRCN0000221083		BABAM2		10917632	9493832	8580144	9.66387e+06	1.17798e+06		0.901145	1.34191	0.544788	0.929283	0.399307		1.05704	0.955902	0.96243	0.991792	0.0566042
TRCN0000221085		BABAM2		12977672		14874920	13926296	1.34156e+06		1.07118		0.944469	1.00783	0.0895993		0.980548	0.92368	0.899462	0.934563	0.0416238
TRCN0000338431		BAZ1B		9324256	8887480	12734336	1.03154e+07	2.10625e+06		0.769628	1.25621	0.808555	0.944797	0.270392		1.02382	0.893687	0.969356	0.962288	0.0653543
TRCN0000013342		BAZ1B		11900824	15777456	16523496	1.47339e+07	2.48173e+06		0.982298	2.23008	1.04914	1.42051	0.701906		0.995331	0.944038	0.950281	0.963217	0.0279862
TRCN0000338494		BAZ1B		16386808	21502192	21108240	1.96657e+07	2.84647e+06		1.35257	3.03925	1.34025	1.91069	0.977379		1.02707	0.975421	0.966974	0.989821	0.0325325
TRCN0000273476		BLM		8843744	7565184	8022824	8.14392e+06	647825		0.388283	0.441188	0.526057	0.451843	0.0695022		0.96598	1.01184	1.12759	1.03513	0.0832831
TRCN0000273475		BLM		19370696	18477936	22324408	20057680	2.01316e+06		0.850467	1.0776	1.46381	1.13063	0.310092		0.941904	1.05871	1.20357	1.06806	0.131086
TRCN0000004905		BLM		22104408	21914464	24034832	22684568	1.17321e+06		0.97049	1.27801	1.57597	1.27482	0.30275		0.88561	1.00704	1.14027	1.01097	0.127374
TRCN0000244986		BRCA1		15648840	12360904	11582592	1.31974e+07	2.15834e+06		0.68706	0.720866	0.759471	0.722466	0.0362323		0.935113	1.01364	1.1406	1.02978	0.103692
TRCN0000244984		BRCA1		14374016	15706144	14710824	14930328	692660		0.631089	0.915955	0.96459	0.837211	0.180156		0.930778	1.03766	1.17008	1.04617	0.119877
TRCN0000244987		BRCA1		18879776	16939840	16033568	1.72844e+07	1.45405e+06		0.828913	0.987902	1.05132	0.956046	0.114575		0.95345	1.03313	1.15715	1.04791	0.10265
TRCN0000040195		BRCA2		27431632	26886656	27500888	2.72731e+07	336421		1.20438	1.56798	1.80324	1.5252	0.301711		0.961286	0.986514	1.19374	1.04718	0.127549
TRCN0000010306		BRCA2		12715776	18731168	17936136	1.6461e+07	3.26775e+06		1.04956	2.64757	1.13884	1.61199	0.897951		0.958847	0.944729	0.967496	0.957024	0.0114921
TRCN0000312567		BRCA2		22957808		23487088	23222448	374257		1.89495		1.49129	1.69312	0.285427		0.998064	0.948453	0.968839	0.971785	0.0249363
TRCN0000073970		BRCC3		11868232	13548752	13156408	1.28578e+07	879155		0.979608	1.91506	0.835354	1.24334	0.586181		0.974101	0.932312	0.925936	0.944116	0.0261624
TRCN0000073968		BRCC3		16954728	16441072	14679080	16024960	1.19353e+06		1.39945	2.32388	0.932035	1.55179	0.708317		0.968982	0.875757	0.933713	0.926151	0.0470707
TRCN0000073969		BRCC3		17750480	20022552	18209288	1.86608e+07	1.20144e+06		1.46513	2.83011	1.15618	1.81714	0.890752		1.04767	1.00623	1.00028	1.01806	0.0258116
TRCN0000049916		BRIP1		15668896	14648320	15720456	1.53459e+07	604664		0.68794	0.854265	1.03079	0.857665	0.171451		0.976395	0.903767	1.1675	1.01589	0.136228
TRCN0000049914		BRIP1		8776936		10333648	9555292	1.10076e+06		0.724452		0.656125	0.690288	0.0483138		1.0125	0.94118	0.959216	0.970967	0.0370854
TRCN0000368638		BRIP1		11114176	10929608	10096424	1.07134e+07	542230		0.917368	1.54486	0.641063	1.03443	0.463128		1.08079	0.971329	0.964025	1.00538	0.0654055
TRCN0000231598		BTG2		23013240	18325464	18806728	2.00485e+07	2.57881e+06		1.01039	1.06871	1.23316	1.10409	0.11552		1.01076	0.975637	1.18906	1.05849	0.114437
TRCN0000231891		BTG2		12646136		15111936	13879036	1.74358e+06		1.04382		0.959518	1.00167	0.0596079		1.0349	0.97998	0.951366	0.98875	0.0424536
TRCN0000231596		BTG2		24232064	23512480	24229128	23991224	414607		2.00012	3.32339	1.53841	2.28731	0.9265		1.00741	0.914349	0.93813	0.953297	0.0483496
TRCN0000342952		CCNH		4328072	3042200	3876496	3.74892e+06	652359		0.190023	0.177416	0.254182	0.207207	0.0411671		0.997318	1.00759	1.16175	1.05555	0.0921168
TRCN0000020219		CCNH		4332696	4498008	5306280	4712328	520976		0.190226	0.262316	0.347933	0.266825	0.0789501		0.932124	0.981593	1.14362	1.01911	0.11063
TRCN0000342951		CCNH		8855104	8406576	7942272	8.40132e+06	456439		0.388782	0.490257	0.520775	0.466605	0.0691024		0.868906	0.991987	1.11892	0.993273	0.125014
TRCN0000163734		CCNO		5979264	6120072	6513480	6204272	276882		0.262519	0.356912	0.427089	0.34884	0.0825818		0.865092	1.01977	1.12607	1.00365	0.131235
TRCN0000162479		CCNO		17061896	12296920	10660888	1.33399e+07	3.32552e+06		0.7491	0.717135	0.699035	0.721757	0.0253502		0.945878	1.00872	1.02538	0.993325	0.0419262
TRCN0000160535		CCNO		12812384	13894784	16829992	1.45124e+07	2.07879e+06		1.05754	1.96397	1.0686	1.36337	0.520164		0.987581	0.894713	0.897831	0.926708	0.0527401
TRCN0000196691		CDK7		15596080	19096544	16707752	1.71335e+07	1.78864e+06		1.28731	2.69922	1.06084	1.68246	0.887793		1.00172	0.959224	0.965601	0.975516	0.0229182
TRCN0000230910		CDK7		21793752	21260520	21112264	2.13888e+07	358409		1.79886	3.00509	1.3405	2.04815	0.859837		0.925205	0.907745	0.880616	0.904522	0.0224689
TRCN0000000592		CDK7		30457056	31305976	31631384	31131472	606301		2.51394	4.42497	2.00841	2.98244	1.27459		1.01952	0.970864	1.01777	1.00272	0.0275986
TRCN0000233270		CDKN2D		14442056	12580112	12182792	13068320	1.20616e+06		0.634076	0.73365	0.798827	0.722184	0.0829716		1.0078	1.03278	1.20462	1.08173	0.107151
TRCN0000233267		CDKN2D		13321200	14133880	14272600	1.39092e+07	513948		1.09954	1.99777	0.906226	1.33451	0.582473		0.985506	0.904464	0.91405	0.934673	0.0442826
TRCN0000233271		CDKN2D		20830992		21892104	21361548	750319		1.7194		1.39002	1.55471	0.232906		1.01368	0.977199	0.9314	0.974092	0.0412272
TRCN0000418339		CETN2		10132616	13514032	12307104	11984584	1.71362e+06		0.444871	0.788115	0.806978	0.679988	0.203836		0.907103	0.999137	1.15327	1.01984	0.124384
TRCN0000055802		CETN2		14606648	15477184	15648672	15244168	558727		0.641302	0.902602	1.02608	0.856663	0.196462		0.973185	1.02767	1.17248	1.05778	0.103003
TRCN0000055800		CETN2		19981720	22014232	20490208	20828720	1.0577e+06		0.877294	1.28383	1.34354	1.16822	0.253715		0.939393	0.968009	1.14495	1.01745	0.111342
TRCN0000234596		CHAF1A		13504888	10851488	13110592	1.2489e+07	1.43176e+06		0.59293	0.63284	0.859662	0.695144	0.143868		0.798915	0.826495	1.03213	0.885845	0.127432
TRCN0000074274		CHAF1A		11614368	10374320	9646928	1.05452e+07	994790		0.958654	1.46637	0.612523	1.01252	0.429463		1.04242	0.947827	0.958126	0.982791	0.0518972
TRCN0000074273		CHAF1A		23493560		24286608	23890084	560770		1.93917		1.54206	1.74061	0.2808		1.02047	0.977626	0.959847	0.98598	0.0311622
TRCN0000199796		CHEK1		9631368	9218088	9550160	9.46654e+06	218962		0.615641	0.495853	0.425368	0.512287	0.0961952		0.891119	0.79958	0.656984	0.782561	0.117992
TRCN0000000501		CHEK1		13893104	12831704	15388472	14037760	1.28451e+06		0.888053	0.690235	0.685409	0.754565	0.115629		0.931201	0.893225	0.856403	0.89361	0.0374004
TRCN0000000502		CHEK1		20542272	19592776	23129232	2.10881e+07	1.83032e+06		1.64384	1.50458	1.69303	1.61382	0.0977474		1.01272	1.01211	0.977497	1.00078	0.0201623
TRCN0000010213		CHEK2		6300472	5358592	5538296	5.73245e+06	500057		0.402729	0.288246	0.246678	0.312551	0.0808147		0.913649	0.908463	0.863421	0.895177	0.0276237
TRCN0000344538		CHEK2		8252616	6680232	6660896	7.19791e+06	913449		0.527511	0.359339	0.296679	0.394509	0.119367		0.925836	0.836183	0.822237	0.861419	0.0562209
TRCN0000010209		CHEK2		11421504	9530608	11325360	1.07592e+07	1.06504e+06		0.913973	0.73188	0.829004	0.824952	0.0911139		1.04756	1.06253	1.00343	1.03784	0.0307226
TRCN0000333400		CIB1		8194400	7751968	8661432	8202600	454787		0.523789	0.416989	0.385784	0.442187	0.0723714		0.880976	0.810961	0.840995	0.84431	0.035125
TRCN0000333398		CIB1		11521864	11667464	12960912	12050080	792156		0.736482	0.627609	0.577284	0.647125	0.0813736		0.918476	0.894919	0.885642	0.899679	0.0169268
TRCN0000382068		CIB1		26228272	27277416	27212144	26905944	587788		2.09884	2.0947	1.9919	2.06181	0.0605845		1.01915	1.04504	0.953479	1.00589	0.0471975
TRCN0000199189		CLK2		8516800	7854960	10189240	8.85367e+06	1.20305e+06		0.681532	0.603203	0.745841	0.676859	0.0714338		1.02199	1.05186	0.935115	1.00299	0.0606483
TRCN0000355628		CLK2		10666752	7238024	9191016	9.03193e+06	1.71989e+06		0.853576	0.555827	0.672772	0.694058	0.150012		0.969655	1.02436	0.899442	0.964485	0.0626188
TRCN0000197205		CLK2		16447776	13830424	16380400	1.55529e+07	1.49206e+06		1.31619	1.06207	1.19903	1.19243	0.127184		1.01143	1.06829	0.93674	1.00549	0.065975
TRCN0000017868		CNOT7		7854288	7227128	9474120	8.18518e+06	1.15947e+06		0.628517	0.55499	0.693495	0.625667	0.0692964		1.03325	1.08006	0.969839	1.02772	0.0553175
TRCN0000017872		CNOT7		14285536	13315912	16444000	14681816	1.60125e+06		1.14316	1.02256	1.20368	1.12313	0.0922048		0.939178	1.02926	0.946539	0.971657	0.050017
TRCN0000017870		CNOT7		16855608	16388384	17344672	16862888	478186		1.34882	1.25851	1.26961	1.29231	0.0492516		0.964216	1.0436	0.95193	0.986581	0.0497575
TRCN0000010640		CSNK1D		10924680	10404880	13924488	1.17513e+07	1.89985e+06		0.69831	0.559693	0.620202	0.626068	0.0694946		0.938153	0.909567	0.899212	0.915644	0.0201694
TRCN0000001550		CSNK1D		13278296	12098616	11976632	1.24512e+07	718894		1.06256	0.929084	0.876676	0.956106	0.0958414		1.05326	0.997102	0.926562	0.992308	0.0634857
TRCN0000297740		CSNK1D		13145704	13260320	12678952	1.30283e+07	307946		1.05195	1.01829	0.928085	0.999442	0.0640468		1.02027	1.09227	0.983188	1.03191	0.0554625
TRCN0000220099		CSNK1E		9274632	8848336	11075264	9732744	1.18203e+06		0.742176	0.679487	0.810697	0.74412	0.0656267		0.986372	0.98383	0.946757	0.97232	0.0221745
TRCN0000199466		CSNK1E		11368152	9441296	10643800	10484416	973266		0.909703	0.725022	0.779114	0.804613	0.0949446		1.03609	1.04543	0.955808	1.01244	0.0492696
TRCN0000055427		CSNK1E		13822272	15612616	12995936	14143608	1.33761e+06		1.10609	1.19893	0.951288	1.08544	0.125108		1.02431	1.08346	0.997707	1.03516	0.0438968
TRCN0000271379		DCLRE1A		3766048	2654856	2803384	3.07476e+06	603259		0.240727	0.142808	0.124864	0.169466	0.0623625		0.95126	0.785074	0.768378	0.834904	0.101112
TRCN0000271437		DCLRE1A		15195288	17829488	18373976	1.71329e+07	1.69998e+06		0.971289	0.959072	0.818384	0.916249	0.0849727		0.906205	0.907886	0.878081	0.897391	0.0167437
TRCN0000271380		DCLRE1A		16522504	14315144	16344488	1.57274e+07	1.22627e+06		1.32217	1.0993	1.1964	1.20595	0.111741		1.0061	0.990533	0.967079	0.987905	0.0196436
TRCN0000271486		DCLRE1B		5870264	6173616	7100984	6.38162e+06	641185		0.37523	0.332087	0.316281	0.341199	0.0305126		0.995681	0.98733	0.940945	0.974652	0.0294883
TRCN0000271542		DCLRE1B		18337064	17527400	21588160	1.91509e+07	2.14922e+06		1.17211	0.942823	0.961545	1.02549	0.12732		0.899912	0.888142	0.888273	0.892109	0.00675783
TRCN0000271487		DCLRE1B		22380112	22708416	25318480	2.3469e+07	1.61008e+06		1.43055	1.22152	1.1277	1.25992	0.155034		0.979318	0.925996	0.933672	0.946328	0.0288266
TRCN0000083379		DCLRE1C		21008672	20903624	28770048	2.35608e+07	4.51166e+06		1.34288	1.12443	1.28143	1.24958	0.112653		0.936489	0.929612	0.914108	0.926736	0.0114647
TRCN0000083380		DCLRE1C		2330272	2256912	2772368	2453184	278844		0.186473	0.173314	0.202934	0.187574	0.0148407		1.07562	1.10156	1.03771	1.07163	0.0321083
TRCN0000276611		DCLRE1C		16316224	14036696	15476336	1.52764e+07	1.15284e+06		1.30566	1.07791	1.13285	1.17214	0.118847		1.02691	1.05871	0.973689	1.01977	0.0429592
TRCN0000315842		DDB1		5044272	5382360	6683096	5.70324e+06	865252		0.322432	0.289524	0.297668	0.303208	0.017139		0.912487	0.915104	0.866781	0.898124	0.0271755
TRCN0000082856		DDB1		12747912	11557256	15484704	1.32633e+07	2.01381e+06		0.814852	0.62168	0.689695	0.708742	0.0979841		0.946441	0.884417	0.940718	0.923859	0.0342771
TRCN0000315844		DDB1		20666544	18948936	22878408	20831296	1.96991e+06		1.32101	1.01929	1.01901	1.11977	0.174281		0.928154	0.845308	0.902555	0.892006	0.0424186
TRCN0000083993		DDB2		13432272	11154416	15672064	13419584	2.25885e+06		0.858596	0.600011	0.69804	0.718883	0.130546		0.925669	0.878244	0.934611	0.912841	0.0302943
TRCN0000083996		DDB2		7052520	7236320	6774064	7020968	232738		0.564357	0.555696	0.495854	0.538636	0.0373024		0.983493	1.00653	0.962524	0.984182	0.0220098
TRCN0000083995		DDB2		14793600	15975184	14722440	1.51637e+07	703630		1.18381	1.22678	1.07767	1.16275	0.0767539		0.960754	1.03908	0.972089	0.99064	0.0423288
TRCN0000156039		DDX11		7668216	5714864	7581896	6.98833e+06	1.10369e+06		0.490155	0.30741	0.337701	0.378422	0.097942		0.981243	0.880096	0.888292	0.916544	0.0561806
TRCN0000271547		DDX11		7119904	10017008	7597952	8.24495e+06	1.55315e+06		0.455107	0.538828	0.338416	0.444117	0.100657		0.939485	0.947111	0.906607	0.931068	0.0215239
TRCN0000152654		DDX11		7410696	7508416	8483344	7.80082e+06	593100		0.593019	0.576591	0.620971	0.59686	0.0224382		0.990924	1.07316	0.947348	1.00381	0.063888
TRCN0000307166		DLGAP5		10147944	9674976	11705696	1.05095e+07	1.06255e+06		0.648661	0.52043	0.521376	0.563489	0.0737623		0.947533	0.890497	0.864346	0.900792	0.0425381
TRCN0000062228		DLGAP5		11611448	12457248	12980128	12349608	690660		0.742208	0.670092	0.57814	0.66348	0.0822338		0.922151	0.927532	0.927569	0.925751	0.00311756
TRCN0000062230		DLGAP5		19069360	20773776	22118776	2.0654e+07	1.52823e+06		1.21892	1.11745	0.985179	1.10718	0.117209		0.964328	0.940567	0.912413	0.939102	0.0259882
TRCN0000369999		DMC1		16147080	16982384	21035720	1.80551e+07	2.6149e+06		1.03213	0.913505	0.93694	0.960858	0.0628242		0.944257	0.895396	0.912485	0.917379	0.0247956
TRCN0000151097		DMC1		13002048	10326920	14225072	1.2518e+07	1.99364e+06		1.04045	0.793031	1.04126	0.958247	0.143082		1.03479	1.08696	0.985706	1.03582	0.0506365
TRCN0000377371		DMC1		12082312	13633296	14586912	1.34342e+07	1.26412e+06		0.966852	1.04694	1.06775	1.02718	0.0532698		1.01823	1.05972	0.974732	1.01756	0.0424986
TRCN0000009830		DNA2		3583112	3387048	3736024	3568728	174932		0.286728	0.2601	0.273473	0.273434	0.013314		1.04515	1.10269	0.9686	1.03881	0.0672705
TRCN0000424119		DNA2		22353064	20296024	19369472	2.06729e+07	1.52707e+06		1.78874	1.55858	1.41782	1.58838	0.187245		1.0209	1.03042	0.945472	0.998931	0.0465405
TRCN0000039921		DNA2		28105224	29517896	29091640	28904920	724609		2.24904	2.26676	2.12948	2.21509	0.0746719		0.999896	1.03373	0.935936	0.989854	0.0496652
TRCN0000232748		DNMT1		7324776	6444584	8320832	7.3634e+06	938720		0.468203	0.346663	0.370613	0.39516	0.0643807		0.866145	0.888686	0.862259	0.872363	0.0142692
TRCN0000021893		DNMT1		20175976	17775616	19057376	1.9003e+07	1.2011e+06		1.28966	0.956174	0.848823	1.03155	0.22988		0.86575	0.793199	0.861649	0.840199	0.0407547
TRCN0000021891		DNMT1		8030960	9745656	9486880	9087832	924378		0.642654	0.748394	0.694429	0.695159	0.0528738		0.565211	0.74946	0.567046	0.627239	0.105851
TRCN0000050877		DUT		2937616	4597576	2999736	3.51164e+06	940959		0.187774	0.24731	0.133609	0.189564	0.0568713		0.895537	0.815298	0.720049	0.810294	0.087851
TRCN0000050873		DUT		3484040	7815648	6783560	6.02775e+06	2.26255e+06		0.222701	0.420414	0.302143	0.315086	0.09949		0.671391	0.583838	0.414397	0.556542	0.130653
TRCN0000050876		DUT		4057112	2891744	3926440	3.6251e+06	638456		0.324659	0.222065	0.287411	0.278045	0.0519344		0.96203	1.03009	0.925744	0.972621	0.0529733
TRCN0000049767		EME1		7790096	7599976	11003944	8.79801e+06	1.91276e+06		0.497946	0.408813	0.49012	0.465626	0.0493572		0.873826	0.925984	0.906706	0.902172	0.0263733
TRCN0000049766		EME1		8551184	9506440	7862776	8.64013e+06	825434		0.546595	0.511364	0.350211	0.46939	0.104704		0.933181	0.880199	0.851129	0.88817	0.0416027
TRCN0000049764		EME1		9899024	7103760	12697960	9900248	2.7971e+06		0.63275	0.382121	0.565572	0.526814	0.129732		0.984609	0.958093	0.984916	0.975873	0.0153987
TRCN0000049774		EME2		21625928	20568840	24689160	2.22946e+07	2.14001e+06		1.38234	1.10643	1.09967	1.19614	0.161285		0.959443	0.892065	0.867503	0.906337	0.0476029
TRCN0000049776		EME2		6859256	5651400	6503624	6.33809e+06	620709		0.548892	0.433986	0.476058	0.486312	0.0581354		1.04691	1.06155	0.964373	1.02428	0.0523919
TRCN0000049773		EME2		22610784	19722016	19936400	20756400	1.60952e+06		1.80936	1.5145	1.45932	1.5944	0.1882		1.069	1.05046	0.969764	1.02974	0.0527619
TRCN0000049920		ERCC1		6353088	6980640	7694504	7.00941e+06	671171		0.508387	0.536061	0.563229	0.535893	0.0274212		1.02531	1.09112	0.927022	1.01448	0.0825815
TRCN0000343853		ERCC1		8452512	9047920	10581944	9360792	1.09865e+06		0.676388	0.694813	0.774586	0.715262	0.0521955		0.956721	1.0009	0.941234	0.966285	0.0309623
TRCN0000343852		ERCC1		16443448	15431872	16948944	1.62748e+07	772477		1.31584	1.18505	1.24064	1.24718	0.0656373		1.05282	1.06179	0.991363	1.03532	0.0383351
TRCN0000275695		ERCC2		9322368	11077400	14659616	1.16865e+07	2.72025e+06		0.59589	0.595868	0.652945	0.614901	0.0329472		0.957484	0.950158	0.925292	0.944311	0.0168738
TRCN0000021941		ERCC2		13397048	11557584	14560544	1.31717e+07	1.51411e+06		0.856345	0.621698	0.648533	0.708858	0.12843		0.939274	0.909145	0.887983	0.912134	0.0257758
TRCN0000021942		ERCC2		15168448	13959760	16944816	1.53577e+07	1.5015e+06		0.969573	0.750914	0.754729	0.825072	0.125156		0.947236	0.916034	0.893018	0.918763	0.0272117
TRCN0000359264		ERCC3		4524328	4440352	7252976	5.40589e+06	1.60018e+06		0.362046	0.340986	0.53091	0.411314	0.104107		0.976949	1.04226	0.964519	0.994575	0.0417593
TRCN0000359265		ERCC3		10711248	13555912	13249264	1.25055e+07	1.56139e+06		0.857137	1.04099	0.969831	0.955987	0.0927071		0.982832	1.0661	0.958739	1.00256	0.0563307
TRCN0000359267		ERCC3		15876248	14435408	19310440	1.65407e+07	2.50452e+06		1.27045	1.10853	1.4135	1.26416	0.152582		0.983283	0.984937	0.884168	0.950796	0.0577076
TRCN0000078583		ERCC4		10632704	6376480	9266184	8758456	2.17306e+06		0.850851	0.489666	0.678274	0.672931	0.180652		1.01813	0.986554	0.914315	0.973001	0.0532196
TRCN0000078587		ERCC4		9684576	9862960	10319360	9955632	327382		0.77498	0.757402	0.755366	0.762583	0.0107847		1.02907	1.10199	0.935238	1.0221	0.0835947
TRCN0000078584		ERCC4		15277640	13627488	12801368	1.39022e+07	1.26078e+06		1.22255	1.04649	0.937046	1.06869	0.144041		0.995349	1.0075	0.93015	0.977667	0.0415971
TRCN0000358809		ERCC5		8661144	6505416	8127072	7764544	1.12266e+06		0.553624	0.349935	0.361983	0.421847	0.114281		1.00943	0.948615	0.938074	0.965374	0.0385176
TRCN0000358807		ERCC5		9231208	11795680	12323592	1.11168e+07	1.65419e+06		0.738701	0.905821	0.902073	0.848865	0.0954234		1.00079	1.04681	0.95335	1.00032	0.0467304
TRCN0000358878		ERCC5		12058568	11452504	15327648	12946240	2.0845e+06		0.964952	0.879468	1.12197	0.988795	0.122995		0.972038	1.04016	0.962473	0.991556	0.0423609
TRCN0000431424		ERCC6		7553880	9497424	8213512	8.42161e+06	988341		0.482847	0.510879	0.365833	0.453187	0.0769377		0.916475	0.914264	0.870515	0.900418	0.0259204
TRCN0000436471		ERCC6		17618032	18023328	21511552	1.9051e+07	2.14054e+06		1.12615	0.969499	0.958133	1.01793	0.0938966		0.905829	0.91207	0.928604	0.915501	0.0117683
TRCN0000016776		ERCC6		20188776	20375000	23144176	21235984	1.65516e+06		1.29047	1.096	1.03085	1.13911	0.135074		0.941317	0.914209	0.898392	0.917973	0.0217084
TRCN0000003722		ERCC8		20219112	18343560	20835608	1.97994e+07	1.29795e+06		1.29241	0.986725	0.928026	1.06906	0.195648		0.947752	0.905953	0.892313	0.91534	0.0288869
TRCN0000003723		ERCC8		5292808	8697696	6923424	6.97131e+06	1.70295e+06		0.423542	0.667919	0.506787	0.532749	0.12424		1.03559	1.0995	0.989131	1.04141	0.0554141
TRCN0000342528		ERCC8		8029008	7388864	11081448	8.83311e+06	1.97325e+06		0.642498	0.56741	0.81115	0.673686	0.124827		1.04063	1.11202	1.03037	1.06101	0.0444753
TRCN0000315624		EYA1		13387344	12891424	15574320	1.3951e+07	1.42751e+06		0.855724	0.693447	0.693687	0.747619	0.0936218		0.961506	0.902321	0.854418	0.906082	0.0536431
TRCN0000310704		EYA1		7195992	7439472	8094424	7.57663e+06	464655		0.575838	0.571296	0.592503	0.579879	0.0111657		1.04573	1.12415	0.974551	1.04814	0.0748273
TRCN0000083443		EYA1		17854728	14620008	15082816	1.58525e+07	1.74934e+06		1.42877	1.12271	1.10405	1.21851	0.182333		1.03489	1.04104	0.978092	1.01801	0.0347035
TRCN0000051604		EYA3		11689952	11421872	13303472	12138432	1.01782e+06		0.747226	0.614398	0.592542	0.651389	0.0837142		0.970749	0.926547	0.96291	0.953402	0.023585
TRCN0000051606		EYA3		13389376	11072584	13784576	1.27488e+07	1.46507e+06		0.855854	0.595609	0.613971	0.688478	0.145243		0.962503	0.882958	0.909309	0.918257	0.0405203
TRCN0000051607		EYA3		27263912	28646056	30335312	2.87484e+07	1.53826e+06		1.74272	1.54091	1.35115	1.54493	0.195818		0.960823	0.922423	0.851268	0.911505	0.0555874
TRCN0000274971		FAAP24		2943496	2526584	2865376	2.77849e+06	221622		0.188149	0.135908	0.127625	0.150561	0.032815		0.97522	0.911578	0.92374	0.936846	0.0337842
TRCN0000285281		FAAP24		8586000	8928376	11105784	9.54005e+06	1.36673e+06		0.548821	0.480269	0.494656	0.507915	0.0361479		0.949055	0.918155	0.923681	0.930297	0.0164779
TRCN0000275043		FAAP24		13184080	10902616	14989232	1.30253e+07	2.04793e+06		0.842732	0.586466	0.667626	0.698942	0.130971		0.97471	0.940833	0.951606	0.955716	0.0173087
TRCN0000133972		FAN1		4446640	3939208	5184928	4523592	626415		0.357931	0.290289	0.352123	0.333447	0.0374887		0.948122	0.875059	0.974542	0.932574	0.0515313
TRCN0000412880		FAN1		8670272	6923320	7081856	7.55848e+06	966095		0.69791	0.510195	0.480948	0.563018	0.117732		1.02739	1.01973	1.04142	1.02951	0.0109979
TRCN0000437751		FAN1		13141888	13532176	12996376	13223480	277062		1.05785	0.997217	0.882619	0.979229	0.0889901		0.92355	0.959681	0.94449	0.942574	0.0181415
TRCN0000296873		FANCA		6663800	3819032	8622968	6368600	2.41553e+06		0.339478	0.298594	0.494712	0.377595	0.103466		1.01601	0.902056	0.959679	0.95925	0.0569806
TRCN0000296799		FANCA		16115832	8716248	14438808	13090296	3.87973e+06		0.821	0.681486	0.828375	0.776954	0.0827596		1.11352	0.935508	1.02682	1.02529	0.0890181
TRCN0000118985		FANCA		15390816	9907080	19983560	1.50938e+07	5.0448e+06		0.784065	0.774592	1.14649	0.901714	0.212031		1.02705	0.944299	1.04203	1.00446	0.0526369
TRCN0000159760		FANCB		7026016	9247816	7354880	7.87624e+06	1.19915e+06		0.565556	0.681493	0.49949	0.58218	0.0921331		0.955301	0.917999	0.940246	0.937848	0.0187662
TRCN0000158592		FANCB		13812864	14308144	16083432	1.47348e+07	1.1939e+06		1.11186	1.0544	1.09227	1.08618	0.0292111		1.00546	0.917535	0.989598	0.970865	0.046861
TRCN0000163896		FANCB		15562424	18895504	14233576	1.62305e+07	2.40169e+06		1.25269	1.39245	0.966641	1.20393	0.217054		0.934745	0.950519	0.944999	0.943421	0.00800425
TRCN0000358554		FANCC		4347816	4472176	4629544	4.48318e+06	141186		0.349976	0.329565	0.314405	0.331315	0.0178499		0.902728	0.864493	0.903837	0.890353	0.022402
TRCN0000083370		FANCC		16277224	15542360	17021712	16280432	739681		1.31023	1.14535	1.15599	1.20386	0.092274		0.954853	0.886741	0.958298	0.933297	0.0403556
TRCN0000358555		FANCC		16290280	10773336	13835664	1.36331e+07	2.76404e+06		0.829887	0.842321	0.793772	0.821993	0.0252187		1.05654	0.921564	0.964253	0.980784	0.0689873
TRCN0000417689		FANCD2		12593640	15335832	15808112	1.45792e+07	1.73568e+06		1.01372	1.13013	1.07357	1.07247	0.058214		0.916275	0.867572	1.01768	0.933843	0.0765817
TRCN0000427042		FANCD2		12017832	6897368	14203896	1.10397e+07	3.75019e+06		0.612233	0.539276	0.814898	0.655469	0.142807		0.964232	0.882001	1.00814	0.951458	0.0640325
TRCN0000435569		FANCD2		13558320	9515064	10867152	11313512	2.05825e+06		0.690711	0.743942	0.623464	0.686039	0.0603747		0.943702	0.844532	0.841056	0.87643	0.0582848
TRCN0000131067		FANCE		2796024	4879872	4489896	4055264	1.10783e+06		0.225065	0.359609	0.304921	0.296532	0.0676632		0.842907	0.753842	0.829541	0.808763	0.0480302
TRCN0000118821		FANCE		11361528	9481496	10290568	10377864	943051		0.914542	0.698713	0.69886	0.770705	0.124566		0.960433	0.931041	0.964128	0.951867	0.0181303
TRCN0000131023		FANCE		13629400	10369248	13987648	1.26621e+07	1.99373e+06		0.694332	0.810727	0.802491	0.769183	0.0649541		1.02646	0.948437	1.00282	0.992572	0.0400075
TRCN0000296575		FANCF		12048960	7694656	13707872	11150496	3.10566e+06		0.613818	0.601612	0.78644	0.66729	0.103367		1.01112	0.919504	0.928333	0.952987	0.0505403
TRCN0000083065		FANCF		15300288	7179720	12450384	11643464	4.11998e+06		0.779453	0.561352	0.714296	0.685034	0.111957		1.02855	0.921704	0.973143	0.974465	0.0534347
TRCN0000083064		FANCF		18207416	12198472	17589416	1.59984e+07	3.30534e+06		0.927553	0.953746	1.00913	0.963476	0.04165		1.08767	0.944748	1.05256	1.02832	0.0744781
TRCN0000082858		FANCG		5138792	4502448	5862032	5.16776e+06	680255		0.413645	0.331796	0.398106	0.381182	0.0434701		0.858111	0.870762	0.934267	0.887713	0.0408097
TRCN0000082860		FANCG		9887496	8250504	9352912	9.16364e+06	834748		0.79589	0.607999	0.635182	0.67969	0.101546		0.965838	0.819908	1.0013	0.929016	0.0961389
TRCN0000082859		FANCG		12291096	12031736	12118856	1.21472e+07	131987		0.989367	0.886646	0.823024	0.899679	0.0839337		0.978814	0.945603	0.920099	0.948172	0.0294417
TRCN0000242774		FANCI		9835616	7002704	12613336	9.81722e+06	2.80536e+06		0.501062	0.547511	0.723645	0.59074	0.117419		1.06487	0.914063	1.05067	1.00987	0.0832718
TRCN0000242773		FANCI		14856128	8498552	15019344	1.27913e+07	3.71856e+06		0.756826	0.664465	0.861681	0.760991	0.0986739		1.10704	0.956836	1.04527	1.03638	0.0754968
TRCN0000242770		FANCI		19588392	12615480	20013632	1.74058e+07	4.15401e+06		0.997905	0.98635	1.14821	1.04416	0.0902997		1.04453	0.883362	1.02784	0.985244	0.0886262
TRCN0000083301		FANCL		6019224	6622416	5794064	6.14523e+06	428312		0.484515	0.488021	0.393491	0.455342	0.0535938		0.98654	1.01228	1.04364	1.01415	0.0285954
TRCN0000323352		FANCL		6778128	7509576	7777208	7.35497e+06	517172		0.545603	0.553398	0.528171	0.542391	0.0129164		0.953924	0.894382	0.970083	0.939463	0.0398686
TRCN0000083299		FANCL		15166568	10659080	14338848	1.33882e+07	2.39942e+06		0.772641	0.833388	0.82264	0.809556	0.0324183		0.865771	0.654784	0.642626	0.72106	0.125471
TRCN0000236646		FANCM		9397448	11355136	10948744	1.05671e+07	1.03314e+06		0.756444	0.836786	0.743559	0.77893	0.0505176		0.893643	0.889885	0.979603	0.921044	0.0507489
TRCN0000051357		FANCM		10215568	6253616	9714712	8.72797e+06	2.15743e+06		0.520419	0.488943	0.557347	0.522236	0.034238		1.06309	0.962575	1.00124	1.00897	0.0507011
TRCN0000236647		FANCM		13915488	11864512	12457392	1.27458e+07	1.05547e+06		0.708906	0.927635	0.714698	0.783747	0.124645		0.986235	0.933256	0.827474	0.915655	0.0808305
TRCN0000286444		FEN1		3835600	4544672	4393744	4.25801e+06	373516		0.308745	0.334907	0.298391	0.314014	0.0188198		0.907463	0.869956	1.01295	0.930124	0.0741422
TRCN0000298602		FEN1		14529832	8351224	11972152	11617736	3.10451e+06		0.740203	0.652946	0.68686	0.693336	0.0439874		1.00815	0.877195	0.900909	0.928753	0.0697781
TRCN0000049731		FEN1		15619040	7763648	16995168	1.34593e+07	4.98033e+06		0.795691	0.607006	0.975037	0.792578	0.184035		1.04702	0.849836	1.00321	0.966688	0.10354
TRCN0000062352		GADD45A		8414144	10517376	8205088	9045536	1.27893e+06		0.677293	0.77505	0.55723	0.669858	0.1091		0.987872	0.978807	1.00749	0.991391	0.0146638
TRCN0000062349		GADD45A		17309896	16433760	16933080	1.68922e+07	439493		1.39335	1.21104	1.14997	1.25146	0.126624		1.00844	0.983604	1.03301	1.00835	0.0247032
TRCN0000062351		GADD45A		17632368	15128456	21623096	1.8128e+07	3.27556e+06		0.898258	1.18283	1.24055	1.10721	0.183246		1.02755	0.865628	0.973734	0.955638	0.0824641
TRCN0000430367		GADD45G		15601032	15722336	16988200	16103856	768262		1.2558	1.15861	1.15371	1.18938	0.057576		0.931627	0.888856	0.943808	0.92143	0.0288605
TRCN0000412855		GADD45G		19594784	23326688	22493408	21804960	1.95889e+06		1.57727	1.719	1.52759	1.60795	0.0993238		0.986329	0.986051	0.994526	0.988969	0.00481469
TRCN0000107170		GADD45G		11878584	11037992	11828176	11581584	471439		0.605139	0.863013	0.678599	0.715584	0.132856		0.806267	0.795355	0.795554	0.799059	0.00624323
TRCN0000051879		GEN1		10539984	4717776	8569152	7942304	2.96129e+06		0.536946	0.368863	0.491625	0.465811	0.0869639		1.11883	0.952673	1.05045	1.04065	0.0835129
TRCN0000051880		GEN1		9360608	4699832	9790040	7950160	2.82304e+06		0.476864	0.36746	0.561669	0.468664	0.0973638		1.08046	0.899484	1.00912	0.996353	0.0911603
TRCN0000051878		GEN1		23133632	18423560	25390120	2.23158e+07	3.55456e+06		1.17851	1.44046	1.45667	1.35855	0.156125		1.03743	0.951448	0.998603	0.995829	0.0430604
TRCN0000315377		GTF2H1		6147008	6108120	6036048	6.09706e+06	56300.9		0.494801	0.450121	0.409924	0.451616	0.042458		1.00929	0.92938	1.00402	0.980897	0.0446928
TRCN0000315378		GTF2H1		6724544	7314496	7376984	7.13867e+06	360006		0.54129	0.539022	0.500991	0.527101	0.0226402		1.01862	0.984952	1.02286	1.00881	0.0207717
TRCN0000006068		GTF2H1		10403368	11262256	9297864	1.03212e+07	984773		0.837415	0.829941	0.631443	0.766267	0.11682		0.959911	0.968474	1.01083	0.979737	0.0272621
TRCN0000425360		GTF2H2		16041048	10550624	15957968	1.41832e+07	3.14619e+06		0.81719	0.824908	0.915532	0.852543	0.0546858		1.06501	0.968231	1.04201	1.02509	0.0505631
TRCN0000415156		GTF2H2		27724896	24906744	28090664	2.69074e+07	1.74227e+06		1.41241	1.94735	1.6116	1.65712	0.270361		1.06522	0.956874	0.978422	1.00017	0.0573538
TRCN0000020964		GTF2H2		28047400	26178896	28320064	2.75155e+07	1.16549e+06		1.42884	2.04682	1.62476	1.70014	0.315809		1.04226	0.955856	0.991299	0.996472	0.0434351
TRCN0000352728		GTF2H3		12106344	13799808	12623512	1.28432e+07	867847		0.974495	1.01694	0.857297	0.949577	0.0826869		0.930324	0.950988	0.952321	0.944544	0.0123328
TRCN0000342815		GTF2H3		18752224	23067984	21255320	21025176	2.16707e+06		1.50945	1.69993	1.44351	1.55096	0.133158		0.943648	0.975854	0.98913	0.969544	0.0233886
TRCN0000021019		GTF2H3		23455160	20232560	23897632	2.25285e+07	2.00057e+06		1.19489	1.5819	1.37104	1.38261	0.193762		0.976517	0.830671	1.00705	0.93808	0.0942639
TRCN0000147711		GTF2H4		6290216	6586704	6902472	6.59313e+06	306179		0.506328	0.485389	0.468766	0.486828	0.0188227		0.929146	0.855289	0.955537	0.913324	0.0519632
TRCN0000220069		GTF2H4		13373968	18166240	19019128	16853112	3.04306e+06		1.07653	1.33871	1.29164	1.23563	0.139777		0.923272	0.83879	0.891272	0.884444	0.0426526
TRCN0000220070		GTF2H4		6424952	6014808	12626760	8.35551e+06	3.70469e+06		0.327311	0.470272	0.724415	0.507333	0.20113		0.84147	0.776353	0.879509	0.832444	0.052167
TRCN0000062798		GTF2H5		7776672	9482792	7545720	8.26839e+06	1.05802e+06		0.62598	0.698809	0.51245	0.612413	0.0939171		0.994474	0.984888	0.982058	0.98714	0.00650746
TRCN0000062800		GTF2H5		10149504	11799208	9854864	10601192	1.04792e+06		0.81698	0.869511	0.669271	0.785254	0.103822		1.00334	0.969562	0.97411	0.982336	0.0183275
TRCN0000062802		GTF2H5		18020512	20948888	17278016	1.87491e+07	1.94088e+06		1.45055	1.54377	1.1734	1.38924	0.19265		1.02497	0.96381	1.00349	0.997422	0.0310265
TRCN0000368904		H2AFX		15522728	15004952	14504632	1.50108e+07	509073		1.2495	1.10575	0.985049	1.11343	0.132391		0.905118	0.906451	1.01502	0.942195	0.0630682
TRCN0000073281		H2AFX		15310752	9383680	16210912	1.36351e+07	3.70926e+06		0.779986	0.73367	0.930043	0.814566	0.102652		1.08821	0.892763	1.06008	1.01368	0.10566
TRCN0000364319		H2AFX		23343792	18110200	18287544	1.99138e+07	2.97174e+06		1.18922	1.41596	1.04918	1.21812	0.185088		1.0738	0.895231	0.886879	0.951969	0.105589
TRCN0000051559		HELQ		8043336	9340160	7801136	8.39488e+06	827547		0.647445	0.688298	0.529796	0.621846	0.0822931		0.962056	0.944903	0.986167	0.964375	0.0207295
TRCN0000434179		HELQ		11399816	8652672	10888200	1.03136e+07	1.46094e+06		0.917624	0.637635	0.739447	0.764902	0.141719		0.984692	0.874057	1.03376	0.964169	0.081805
TRCN0000421485		HELQ		21424336	21297728	25144080	22622048	2.18506e+06		1.09143	1.66518	1.44255	1.39972	0.28926		1.00213	0.835056	0.949571	0.928918	0.0854292
TRCN0000437868		HINFP		5650112	10994328	5021616	7.22202e+06	3.28199e+06		0.527943	0.65222	0.405288	0.528484	0.123467		0.96255	0.990338	0.891592	0.94816	0.0509215
TRCN0000414899		HINFP		12382312	11299112	1823888	8.50177e+06	5.80852e+06		0.914714	0.78644	0.103171	0.601442	0.436255		1.00141	0.915835	0.58658	0.834607	0.219018
TRCN0000416993		HINFP		16973648	14105328	17870176	16316384	1.9666e+06		1.25389	0.981758	1.01085	1.08217	0.149425		0.990389	0.795601	0.958636	0.914875	0.104507
TRCN0000018931		HMGB1		7208216	8236040	6860072	7434776	715415		0.580223	0.606933	0.465886	0.551014	0.0749226		0.781153	0.654277	0.859873	0.765101	0.103734
TRCN0000018934		HMGB1		9826120	6033552	5425184	7094952	2.38474e+06		0.500579	0.471738	0.311251	0.427856	0.102007		1.06976	0.90745	0.908964	0.962059	0.0932775
TRCN0000018932		HMGB1		7447440	6533624	8069024	7.35003e+06	772321		0.3794	0.510836	0.462932	0.451056	0.0665179		1.05309	0.895022	0.98465	0.977588	0.0792709
TRCN0000019009		HMGB2		3180864	4413392	4584840	4.0597e+06	765906		0.256042	0.325233	0.311369	0.297548	0.0366073		0.965812	0.94271	1.03109	0.979872	0.0458388
TRCN0000019013		HMGB2		8083912	9792904	8076136	8650984	988939		0.650711	0.721662	0.548472	0.640282	0.0870644		1.02509	1.00901	1.0106	1.0149	0.00886047
TRCN0000019011		HMGB2		10830624	10374640	10030056	1.04118e+07	401574		0.871807	0.764531	0.681168	0.772502	0.0955689		1.01572	0.927082	1.01443	0.985747	0.0508095
TRCN0000018887		HUS1		10551904	10225480	9818496	1.01986e+07	367441		0.849371	0.753539	0.666801	0.75657	0.0913231		0.961611	0.834451	0.91357	0.903211	0.0642099
TRCN0000018885		HUS1		11892688	13503520	12745832	1.2714e+07	805887		0.957297	0.995105	0.865604	0.939336	0.0665929		0.941263	0.935908	1.03045	0.969208	0.0531074
TRCN0000018886		HUS1		19568800	19899176	18911528	1.94598e+07	502760		1.57518	1.46642	1.28433	1.44198	0.146957		0.948821	0.805773	0.949954	0.901516	0.0829183
TRCN0000019159		IGHMBP2		14495696	16116816	15361776	1.53248e+07	811194		1.16683	1.18769	1.04326	1.13259	0.0780622		1.00049	0.947259	1.01087	0.986205	0.0341259
TRCN0000364795		IGHMBP2		15359632	16968808	15551336	1.59599e+07	878960		1.23637	1.25047	1.05613	1.18099	0.108359		0.980781	0.959134	0.97665	0.972188	0.0114921
TRCN0000019160		IGHMBP2		26953904	28881656	27505088	27780216	992889		2.16964	2.12836	1.86795	2.05531	0.163575		1.02878	0.985896	1.02309	1.01259	0.0232921
TRCN0000037812		IP6K3		19199688	17401440	18265608	18288912	899350		1.54547	1.28235	1.24047	1.3561	0.165335		0.856438	0.833568	0.874783	0.85493	0.0206491
TRCN0000197005		IP6K3		8663800	4673704	6661576	6666360	1.99505e+06		0.441366	0.365417	0.382184	0.396322	0.0398996		1.06018	0.95957	1.02871	1.01615	0.0514664
TRCN0000194683		IP6K3		7819216	7109744	9488976	8139312	1.22149e+06		0.39834	0.55588	0.544396	0.499539	0.0878289		1.08528	0.952319	0.965618	1.00107	0.0732309
TRCN0000307319		KAT2A		19104648	19296672	17187184	1.85295e+07	1.16644e+06		1.78513	1.14474	1.38716	1.43901	0.323327		1.02084	0.967897	0.934449	0.974394	0.0435581
TRCN0000038879		KAT2A		4728248	3508192	5013488	4.41664e+06	799564		0.349288	0.244177	0.283595	0.292353	0.0531001		1.03535	0.855301	1.0041	0.964919	0.0962097
TRCN0000294334		KAT2A		8831664	7655520	919816	5.80233e+06	4.26908e+06		0.652418	0.532839	0.0520307	0.412429	0.317789		0.997381	0.941273	0.515147	0.817934	0.263717
TRCN0000293417		KAT5		12319640	16321544	12669656	13770280	2.21638e+06		1.15114	0.968248	1.02255	1.04731	0.0939271		0.999999	1.0028	0.913755	0.972183	0.0506193
TRCN0000020318		KAT5		8787384	7731944	14277200	1.02655e+07	3.51408e+06		0.649147	0.538158	0.807611	0.664972	0.135422		0.962974	0.757277	0.919047	0.879766	0.108329
TRCN0000293405		KAT5		10513416	10523336	20730688	13922480	5.89608e+06		0.776654	0.732444	1.17266	0.89392	0.242408		1.00749	0.964089	0.994997	0.988857	0.0223403
TRCN0000439753		LIG1		16769224	18190280	8235432	14398312	5.3843e+06		1.23879	1.26608	0.465849	0.990238	0.454339		1.01283	0.839462	0.780562	0.877618	0.120744
TRCN0000431836		LIG1		11206616	12221000	23138736	1.55221e+07	6.61566e+06		0.827862	0.850605	1.30888	0.995781	0.271387		0.968201	0.930095	1.03908	0.979124	0.0553056
TRCN0000439464		LIG1		19285096	20207560	24739728	2.14108e+07	2.9196e+06		1.42464	1.40648	1.39944	1.41019	0.0130026		0.96851	0.908676	1.02125	0.966145	0.0563235
TRCN0000300260		LIG3		8598056	8948064	7914440	8.48685e+06	525708		0.803398	0.530829	0.638764	0.657664	0.137264		1.0553	0.9688	1.01155	1.01188	0.0432487
TRCN0000300258		LIG3		9411728	12847376	14670104	12309736	2.6701e+06		0.879427	0.762149	1.18401	0.94186	0.217748		0.978502	0.939758	0.994015	0.970758	0.027945
TRCN0000300259		LIG3		11644480	19510128	15737128	1.56306e+07	3.93391e+06		1.08805	1.15741	1.27012	1.17186	0.0918914		1.03784	0.992452	0.983976	1.00476	0.0289621
TRCN0000229990		LIG4		5854288	12277640	7667136	8599688	3.31166e+06		0.547022	0.72835	0.618805	0.631392	0.0913173		0.948114	0.960934	0.980591	0.963213	0.0163584
TRCN0000217951		LIG4		8799320	11155992	12540168	1.08318e+07	1.89137e+06		0.822204	0.66181	1.0121	0.832038	0.175352		0.981201	0.899893	0.960556	0.947216	0.0422637
TRCN0000229989		LIG4		18875416	18874696	15701512	17817208	1.83225e+06		1.39438	1.31372	0.888179	1.19876	0.271975		1.03069	0.940167	0.975913	0.982256	0.0455927
TRCN0000006570		MAD2L2		5683520	9362080	8308728	7784776	1.89442e+06		0.531065	0.555389	0.670587	0.58568	0.0745301		0.904198	0.925796	0.968753	0.932916	0.0328613
TRCN0000006573		MAD2L2		10855936	17618784	14234960	14236560	3.38142e+06		1.01437	1.0452	1.14889	1.06949	0.0704674		0.997842	0.969102	1.01908	0.99534	0.0250804
TRCN0000006572		MAD2L2		8436600	7259728	7035512	7577280	752590		0.623234	0.505291	0.397974	0.508833	0.112672		1.01474	0.910047	0.963369	0.962719	0.0523499
TRCN0000342688		MBD4		7429104	16729176	9948192	11368824	4.81004e+06		0.694172	0.99243	0.802906	0.829836	0.150942		1.02248	1.07184	1.05824	1.05085	0.0254934
TRCN0000342754		MBD4		5157328	6637560	7857416	6550768	1.35213e+06		0.380985	0.461987	0.444466	0.429146	0.0426185		0.972976	0.997535	1.00371	0.991407	0.0162575
TRCN0000342689		MBD4		4362104	5273608	15870240	8501984	6.39735e+06		0.32224	0.367053	0.897724	0.529006	0.320104		0.938646	0.852912	1.05047	0.947344	0.0990676
TRCN0000018854		MDC1		6012216	5181416	4646680	5280104	688096		0.444138	0.360636	0.262846	0.355874	0.0907398		0.98084	0.883815	0.980364	0.94834	0.0558805
TRCN0000018851		MDC1		8139008	7269328	10076024	8.49479e+06	1.43677e+06		0.60125	0.505959	0.569965	0.559058	0.0485727		0.978138	0.871872	1.02412	0.958044	0.0780883
TRCN0000018850		MDC1		11814400	13502072	22367840	1.58948e+07	5.669e+06		0.872761	0.93977	1.26527	1.02593	0.209962		0.999448	0.893217	1.03712	0.976595	0.0746242
TRCN0000009849		MEN1		8194960	10567992	10365480	9.70948e+06	1.31551e+06		0.765733	0.626928	0.836585	0.743082	0.106648		0.926652	0.91871	0.979427	0.941596	0.0330019
TRCN0000338331		MEN1		12999944	16971808	11236320	13736024	2.93774e+06		1.21471	1.00682	0.906869	1.0428	0.157041		0.987179	0.789606	0.913851	0.896879	0.0998741
TRCN0000338330		MEN1		7636680	8334184	2896256	6289040	2.95886e+06		0.564142	0.580075	0.163831	0.436016	0.235854		0.976869	0.925646	0.816065	0.906193	0.0821481
TRCN0000419534		MGMT		4517616	7760152	6622832	6300200	1.64517e+06		0.422124	0.460358	0.53452	0.472334	0.0571474		0.945266	0.938783	0.987011	0.95702	0.0261742
TRCN0000427322		MGMT		11407336	16419288	13438712	13755112	2.52091e+06		1.0659	0.974046	1.08462	1.04152	0.0591801		0.981806	0.988457	0.953529	0.974597	0.0185462
TRCN0000427501		MGMT		10381728	18544456	14156248	1.43608e+07	4.08521e+06		0.970063	1.10012	1.14253	1.0709	0.0898694		1.01442	0.976525	0.971052	0.987331	0.0236156
TRCN0000040054		MLH1		24638344	30272224	25462024	26790864	3.04294e+06		2.30219	1.79585	2.05501	2.05102	0.253196		1.01308	0.967486	0.995862	0.992142	0.023022
TRCN0000288641		MLH1		7823496	9157152	14656008	10545552	3.62168e+06		0.577942	0.637355	0.829039	0.681445	0.131226		0.916207	0.976085	1.01997	0.970753	0.0520847
TRCN0000288642		MLH1		17392448	18328560	27175528	20965512	5.39836e+06		1.28483	1.2757	1.53722	1.36592	0.148426		0.930079	0.914994	0.987428	0.944167	0.0382167
TRCN0000038738		MLH3		9541096	9540888	2361056	7147680	4.14534e+06		0.704826	0.664064	0.133557	0.500816	0.318708		1.05597	0.902091	0.539044	0.832367	0.265421
TRCN0000038736		MLH3		6385208	6653264	13380120	8.8062e+06	3.9634e+06		0.471692	0.46308	0.756866	0.563879	0.167187		0.971772	0.911543	0.994585	0.9593	0.0429026
TRCN0000038734		MLH3		19768224	21268416	27172744	2.27365e+07	3.91447e+06		1.46033	1.48032	1.53707	1.49257	0.0398076		0.95983	0.917742	0.974105	0.950559	0.0293026
TRCN0000107928		MMS19		1158192	876056	704384	912877	229134		0.0855587	0.0609752	0.0398445	0.0621261	0.0228788		0.340738	0.414161	0.0516103	0.268836	0.191672
TRCN0000107929		MMS19		19471072	19298832	14546096	17772000	2.79504e+06		1.43838	1.34324	0.822821	1.20148	0.33136		1.01821	0.810419	0.617848	0.815493	0.20023
TRCN0000107926		MMS19		23477976	24230608	20576960	22761848	1.92923e+06		1.73438	1.6865	1.16397	1.52828	0.316413		0.933994	0.882077	0.714255	0.843442	0.114851
TRCN0000019948		MNAT1		5912672	7747208	5796312	6.4854e+06	1.09431e+06		0.552477	0.45959	0.467813	0.493293	0.0514192		0.951731	1.00267	0.979101	0.977833	0.0254917
TRCN0000019945		MNAT1		8167488	14259024	11474368	1.13003e+07	3.0495e+06		0.763166	0.845892	0.926081	0.845046	0.0814612		0.970359	0.970799	1.04349	0.994882	0.0420936
TRCN0000019946		MNAT1		9508632	13527696	12213680	1.175e+07	2.04926e+06		0.888481	0.802508	0.98575	0.892246	0.0916794		0.934402	0.985026	0.982815	0.967414	0.0286112
TRCN0000431061		MPG		12184512	15777760	13912184	13958152	1.79706e+06		1.13851	0.935989	1.12283	1.06578	0.112675		0.955508	0.944278	0.945621	0.948469	0.00613278
TRCN0000051252		MPG		15905864	19444080	16466832	1.72723e+07	1.90165e+06		1.48624	1.15349	1.32902	1.32291	0.166458		0.931276	0.891139	0.954204	0.925539	0.0319217
TRCN0000051251		MPG		19804488	24698312	23862160	22788320	2.61768e+06		1.85052	1.46519	1.92588	1.7472	0.247119		1.05496	0.99702	1.0663	1.03943	0.0371589
TRCN0000275345		MPLKIP		24053400	19252576	18905784	2.07373e+07	2.8771e+06		1.05606	1.12278	1.23965	1.1395	0.0929316		0.999887	1.05229	1.14922	1.06713	0.0757662
TRCN0000319191		MPLKIP		18046664	21084464	21861456	2.03309e+07	2.01596e+06		0.792336	1.22961	1.43346	1.1518	0.327567		0.939069	1.01513	1.11689	1.0237	0.0892209
TRCN0000285352		MPLKIP		20908064	23042080	26016144	23322096	2.56553e+06		1.72576	3.2569	1.65187	2.21151	0.90609		1.01364	0.91762	1.00544	0.978898	0.0532262
TRCN0000338391		MRE11		3542072	6308976	5044320	4.96512e+06	1.38515e+06		0.330969	0.374269	0.407121	0.370786	0.0381949		0.930339	0.912231	0.935185	0.925918	0.0120987
TRCN0000338393		MRE11		12637104	11815032	12309064	1.22537e+07	413820		1.1808	0.700907	0.993449	0.958387	0.241862		0.982794	0.949769	0.985561	0.972708	0.0199141
TRCN0000338395		MRE11		8305416	8776400	5907456	7.66309e+06	1.53855e+06		0.613543	0.610854	0.334164	0.51952	0.160529		0.960568	0.867608	0.833332	0.887169	0.0658345
TRCN0000344496		MSH2		5970936	12035760	10640328	9549008	3.17628e+06		0.557921	0.714001	0.858767	0.71023	0.150459		1.04887	1.03258	1.07929	1.05358	0.0237084
TRCN0000332958		MSH2		13623056	11910056	25970120	17167744	7.67105e+06		1.00637	0.828963	1.46904	1.10146	0.330462		0.972908	0.967816	0.972521	0.971082	0.00283458
TRCN0000332891		MSH2		19631848	20402000	24571968	21535272	2.6579e+06		1.45026	1.42002	1.38995	1.42007	0.0301534		0.920888	0.91109	1.01944	0.950472	0.0599273
TRCN0000425424		MSH3		11023552	13738080	13211416	1.26577e+07	1.43949e+06		1.03003	0.814988	1.06628	0.970433	0.135833		0.960211	0.938969	0.974757	0.957979	0.0179981
TRCN0000084062		MSH3		11358512	17303704	14029544	1.42306e+07	2.97769e+06		1.06133	1.02651	1.13231	1.07338	0.0539165		1.00933	0.988869	0.951754	0.983319	0.0291888
TRCN0000422609		MSH3		18120368	21834464	20497016	20150616	1.88112e+06		1.69316	1.29529	1.65429	1.54758	0.219349		0.978706	0.934044	0.940533	0.951094	0.0241313
TRCN0000436119		MSH4		11439448	10020640	1853320	7771136	5.17384e+06		0.845062	0.697456	0.104836	0.549118	0.391774		1.02144	0.86544	0.311865	0.732914	0.372888
TRCN0000151861		MSH4		9610680	8947688	14779968	1.11128e+07	3.19313e+06		0.709966	0.622776	0.836051	0.722931	0.107227		1.01488	0.907799	1.03597	0.986214	0.0687238
TRCN0000428187		MSH4		11061512	15259288	29509984	1.86103e+07	9.66997e+06		0.817143	1.06208	1.66928	1.18283	0.438713		0.901404	0.896604	1.02437	0.940793	0.0724203
TRCN0000010386		MSH5		6209056	10286776	9100112	8.53198e+06	2.09739e+06		0.580171	0.610245	0.734458	0.641625	0.0817903		1.02272	0.974892	1.00771	1.00177	0.0244583
TRCN0000235071		MSH5		6814720	11436088	9779336	9.34338e+06	2.34133e+06		0.636764	0.678426	0.789278	0.701489	0.0788292		0.98463	0.979055	0.958886	0.97419	0.0135439
TRCN0000235073		MSH5		7906184	14245512	9952480	10701392	3.23534e+06		0.73875	0.845091	0.803252	0.795697	0.0535716		0.975423	0.984095	0.958325	0.972614	0.0131128
TRCN0000078546		MSH6		7647248	7001208	6684032	7.11083e+06	490876		0.714555	0.415335	0.53946	0.55645	0.150332		1.03951	0.934194	0.937514	0.970406	0.0598694
TRCN0000298603		MSH6		7607672	14100336	9738808	10482272	3.30957e+06		0.710857	0.836478	0.786007	0.777781	0.0632135		0.982222	0.995848	0.964663	0.980911	0.0156339
TRCN0000078543		MSH6		11094600	15576712	12452232	1.30412e+07	2.29836e+06		1.03667	0.924062	1.005	0.98858	0.0580745		1.04358	1.02315	1.01433	1.02702	0.0149995
TRCN0000344491		MTOR		13017296	15337216	15226448	1.4527e+07	1.3086e+06		1.04782	1.13023	1.03407	1.07071	0.0520075		0.852212	0.894796	0.990006	0.912338	0.0705521
TRCN0000221544		MTOR		21623112	15434808	20532736	1.91969e+07	3.30335e+06		1.10156	1.20678	1.17799	1.16211	0.0543783		1.07766	0.895819	0.953495	0.975659	0.0929257
TRCN0000221543		MTOR		20857088	15137424	21644032	19212848	3.55129e+06		1.06254	1.18353	1.24175	1.16261	0.0914202		0.991481	0.793247	0.881409	0.888712	0.0993187
TRCN0000049725		MUS81		10323664	12033168	10571856	1.09762e+07	923710		0.964638	0.713847	0.853241	0.843909	0.125655		0.974597	0.943564	0.945037	0.954399	0.0175073
TRCN0000049724		MUS81		12822104	18134080	16673928	15876704	2.74426e+06		1.19809	1.07577	1.34573	1.20653	0.135177		0.975388	1.00442	0.984887	0.988232	0.0148032
TRCN0000049723		MUS81		19281144	23760312	20887792	2.13097e+07	2.2692e+06		1.80162	1.40954	1.68583	1.63233	0.20144		1.04585	1.00208	1.03784	1.02859	0.023307
TRCN0000333169		MUTYH		9682896	10231232	9675320	9.86315e+06	318791		0.904765	0.60695	0.780883	0.764199	0.149606		0.99166	0.904339	0.890093	0.928698	0.0549906
TRCN0000333170		MUTYH		12101928	18004904	15883848	1.53302e+07	2.99018e+06		1.1308	1.06811	1.28196	1.16029	0.109936		0.951334	0.953947	0.966993	0.957425	0.00838896
TRCN0000056607		MUTYH		21835512	19941464	26751288	2.28428e+07	3.51487e+06		1.61305	1.38796	1.51323	1.50475	0.112781		1.02046	0.924575	0.983884	0.976306	0.0483896
TRCN0000134678		NABP1		4269504	2465376	3265792	3.33356e+06	903971		0.39894	0.146254	0.263578	0.269591	0.12645		1.02383	0.95079	0.985124	0.986582	0.0365432
TRCN0000414442		NABP1		6712312	8984504	6703040	7.46662e+06	1.31454e+06		0.627195	0.53299	0.540994	0.56706	0.0522321		1.01735	1.02127	1.01032	1.01631	0.00555277
TRCN0000422905		NABP1		5895880	11301432	8609408	8602240	2.70278e+06		0.550908	0.670438	0.694854	0.638733	0.0770327		0.971788	0.971291	0.960813	0.967964	0.00619813
TRCN0000122841		NABP2		9158608	8390696	4883016	7477440	2.27941e+06		0.676571	0.584009	0.276215	0.512265	0.209598		0.982779	0.884831	0.997465	0.955025	0.0612316
TRCN0000343353		NABP2		17032112	15840000	1872112	11581408	8.4296e+06		1.25821	1.10249	0.105899	0.8222	0.625202		0.999789	0.943265	0.773729	0.905595	0.117644
TRCN0000142193		NABP2		13528440	13988040	20424176	1.59802e+07	3.85543e+06		0.999382	0.973594	1.15532	1.04277	0.0983263		0.981236	0.953538	1.03288	0.989217	0.0402674
TRCN0000295898		NBN		8144440	10740688	11029816	9971648	1.589e+06		0.761012	0.637173	0.890202	0.762796	0.126524		0.952571	0.97688	0.987242	0.972231	0.0177968
TRCN0000288632		NBN		16329968	19512968	19124832	1.83226e+07	1.73654e+06		1.52586	1.15757	1.54354	1.40899	0.217915		1.01167	0.987389	1.01788	1.00565	0.016114
TRCN0000288622		NBN		17663984	18950520	28838112	2.18175e+07	6.11393e+06		1.30489	1.31899	1.63127	1.41838	0.184501		0.99782	0.919986	1.03705	0.984952	0.0595845
TRCN0000049708		NEIL1		12565016	17546160	13807928	1.46397e+07	2.59265e+06		1.17407	1.0409	1.11442	1.10979	0.0667065		0.96061	0.966342	0.980054	0.969002	0.00999129
TRCN0000049710		NEIL1		11351024	19064680	17176536	15864080	4.02082e+06		1.06063	1.13098	1.3863	1.19264	0.171363		0.985311	0.91313	0.984433	0.960958	0.0414226
TRCN0000049709		NEIL1		8071728	7723176	11730248	9.17505e+06	2.21972e+06		0.59628	0.537548	0.663539	0.599122	0.0630435		0.976515	0.89195	0.898801	0.922422	0.0469706
TRCN0000416753		NEIL2		3632120	2568832	387808	2.19625e+06	1.65394e+06		0.268314	0.178796	0.0219369	0.156349	0.124713		0.910355	0.785922	0.326404	0.674227	0.307582
TRCN0000422034		NEIL2		14276496	11885256	14839056	13666936	1.56841e+06		1.05464	0.827237	0.839393	0.907091	0.127928		1.01303	0.940102	1.06092	1.00468	0.0608392
TRCN0000064013		NEIL2		15703168	17469512	21088272	18086984	2.74514e+06		1.16003	1.21591	1.19289	1.18961	0.0280824		1.01282	0.907501	1.04398	0.988099	0.0715167
TRCN0000418834		NEIL3		5730408	12607728	10218480	9518872	3.49163e+06		0.535446	0.747932	0.82472	0.7027	0.149848		1.01263	0.975481	1.00081	0.996307	0.0189791
TRCN0000434176		NEIL3		11136720	12302872	21771304	1.50703e+07	5.83246e+06		0.822699	0.856303	1.23153	0.970176	0.226958		0.97775	0.965408	1.02607	0.989744	0.0320625
TRCN0000433012		NEIL3		21620496	19117720	26711656	2.24833e+07	3.86979e+06		1.59716	1.33063	1.51098	1.47959	0.136011		0.998681	0.810139	1.02935	0.946057	0.118703
TRCN0000275632		NHEJ1		11592160	11176896	13956248	12241768	1.49923e+06		0.79421	0.78046	0.955185	0.843285	0.0971518		1.03519	1.03459	1.83669	1.30216	0.46292
TRCN0000275628		NHEJ1		14775072	15450376	18579656	16268368	2.02991e+06		1.01228	1.07887	1.27162	1.12092	0.134686		1.01198	1.014	1.83998	1.28866	0.477464
TRCN0000275629		NHEJ1		14386088	15972248	20175848	16844728	2.99186e+06		0.985629	1.11531	1.38086	1.1606	0.201472		0.977155	0.978513	1.7967	1.25079	0.472773
TRCN0000062272		NPM1		9500896	10341280	9604768	9815648	458164		0.650932	0.722111	0.657364	0.676802	0.03937		0.965353	0.952754	1.80543	1.24118	0.488694
TRCN0000298629		NPM1		16059304	19653864	16632008	17448392	1.93134e+06		1.10027	1.37239	1.13832	1.20366	0.147359		1.00262	1.03972	1.46353	1.16862	0.256071
TRCN0000062270		NPM1		22730928	22601968	24344296	2.32257e+07	970850		1.55736	1.57825	1.66616	1.60059	0.0577377		0.976048	0.957167	1.83412	1.25578	0.500948
TRCN0000011212		NTHL1		14993560	16546640	14662768	1.5401e+07	1.00585e+06		1.02725	1.15542	1.00354	1.06207	0.0817073		0.915406	0.976206	1.82219	1.23793	0.506894
TRCN0000007916		NTHL1		17003328	19295936	19419008	1.85728e+07	1.36056e+06		1.16494	1.3474	1.32906	1.28047	0.100466		1.01458	1.0297	1.30333	1.11587	0.162522
TRCN0000007917		NTHL1		9325640	8809176	9137424	9.09075e+06	261377		0.697506	0.694509	0.648917	0.680311	0.0272291		0.98434	1.04618	1.10087	1.0438	0.0583031
TRCN0000306995		NUDT1		17298760	20220376	22504544	2.00079e+07	2.60939e+06		1.18518	1.41195	1.54024	1.37912	0.17979		0.920701	0.939052	1.86097	1.24024	0.537646
TRCN0000050131		NUDT1		8043648	6030568	6838752	6.97099e+06	1.01303e+06		0.60162	0.475446	0.485671	0.520912	0.0700816		0.981199	0.973967	0.974877	0.976681	0.00393878
TRCN0000050129		NUDT1		11287192	8224040	9805840	9.77236e+06	1.53185e+06		0.844219	0.648378	0.696386	0.729661	0.102073		1.02084	0.955734	0.906996	0.96119	0.0571183
TRCN0000314672		OGG1		12675624	13246440	14209448	1.33772e+07	775224		0.868441	0.924972	0.972514	0.921976	0.0521013		0.911332	0.850462	1.76464	1.17548	0.511138
TRCN0000314669		OGG1		16133360	15724840	19022968	1.69604e+07	1.79789e+06		1.10534	1.09803	1.30196	1.16844	0.115684		0.946087	0.960622	1.51828	1.14166	0.326243
TRCN0000314740		OGG1		22943464	23903696	25493744	2.41136e+07	1.28804e+06		1.57192	1.66915	1.74483	1.66196	0.086678		1.00962	0.983155	1.62218	1.20498	0.361542
TRCN0000220047		PALB2		22486664	23616896	24079456	2.33943e+07	819387		1.54062	1.64912	1.64803	1.61259	0.0623297		0.997838	1.00853	1.25311	1.08649	0.144395
TRCN0000220048		PALB2		26317416	26470480	28908576	2.72322e+07	1.45384e+06		1.80308	1.84838	1.97854	1.87667	0.091089		0.917579	0.979838	1.05381	0.983741	0.0681972
TRCN0000167822		PALB2		26312304	27931040	27336856	27193400	818848		1.96801	2.20206	1.94139	2.03716	0.143432		1.00895	1.01792	0.965914	0.997596	0.0278018
TRCN0000053033		PAPD7		18298440	11094416	17708904	1.57006e+07	3.99994e+06		1.10256	0.809868	1.16862	1.02701	0.190932		0.887592	0.842293	1.01215	0.914012	0.0879573
TRCN0000053037		PAPD7		15969880	16222512	17937168	1.67099e+07	1.07037e+06		0.972652	0.953784	1.22473	1.05039	0.151279		0.979867	0.958165	0.914334	0.950789	0.0333833
TRCN0000053035		PAPD7		32269448	32147888	31460992	3.19594e+07	435929		1.96538	1.8901	2.14812	2.0012	0.132689		0.979726	1.09577	0.936049	1.00385	0.0825471
TRCN0000051303		PARG		15666896	17299216	18522848	1.7163e+07	1.43284e+06		1.07338	1.20797	1.26773	1.18303	0.0995461		1.0222	1.03203	1.47637	1.17687	0.259424
TRCN0000051305		PARG		30119552	30925632	32472784	31172656	1.19591e+06		2.06357	2.15947	2.22248	2.14851	0.080021		0.95817	1.00438	1.45533	1.13929	0.27467
TRCN0000051307		PARG		18399584	19647256	21172632	19739824	1.38884e+06		1.37619	1.54898	1.50363	1.47626	0.0895863		0.947789	0.997974	1.03101	0.992256	0.0419024
TRCN0000007929		PARP1		9899480	9409416	11828744	1.03792e+07	1.27902e+06		0.740426	0.741832	0.840048	0.774102	0.0571151		0.993676	0.984996	0.974311	0.984328	0.00969992
TRCN0000007930		PARP1		11191168	9638040	10280016	1.03697e+07	780442		0.837037	0.759856	0.730061	0.775651	0.0552093		0.982851	0.96079	0.951473	0.965038	0.0161148
TRCN0000338467		PARP1		14192872	13005096	13881136	1.3693e+07	615824		1.06155	1.02531	0.985803	1.02422	0.0378838		0.966441	0.980411	1.00897	0.985272	0.0216751
TRCN0000235600		PARP2		9267896	12031400	13052872	1.14507e+07	1.95816e+06		0.634968	0.840128	0.893357	0.789484	0.136436		1.02507	1.09332	1.96864	1.36235	0.526175
TRCN0000235596		PARP2		8246688	5314016	5867120	6.47594e+06	1.55825e+06		0.616806	0.418953	0.416668	0.484143	0.114896		0.957441	0.975776	0.993645	0.975621	0.0181026
TRCN0000235599		PARP2		21464624	20187472	22438496	2.13635e+07	1.12891e+06		1.60543	1.59157	1.59353	1.59684	0.00750502		1.05301	0.92121	0.960484	0.978236	0.0676711
TRCN0000052940		PARP3		9508384	8332728	8983552	8.94155e+06	588952		0.711174	0.656947	0.637989	0.668703	0.0379824		0.927305	0.873746	0.911827	0.904293	0.0275627
TRCN0000230904		PARP3		11670560	9738320	10934632	1.07812e+07	975218		0.872893	0.767762	0.77655	0.805735	0.0583259		0.973514	0.986205	1.01151	0.990408	0.0193417
TRCN0000230907		PARP3		26885576	27245504	28420704	2.75173e+07	802835		2.01089	2.14802	2.01837	2.05909	0.0771022		1.0189	0.969088	0.975714	0.987899	0.0270471
TRCN0000003864		PCNA		5637104	5052488	7194296	5961296	1.1071e+06		0.386213	0.352805	0.492388	0.410469	0.0728839		0.982513	1.01384	2.01168	1.33601	0.585359
TRCN0000003863		PCNA		8010000	5733072	6959208	6900760	1.13959e+06		0.599103	0.451991	0.494225	0.515107	0.0757462		1.00679	0.947488	0.963211	0.972495	0.0307202
TRCN0000003862		PCNA		16770384	12190944	15971152	1.49775e+07	2.44609e+06		1.25433	0.961126	1.13423	1.11656	0.147399		0.994599	0.926905	0.956545	0.95935	0.033934
TRCN0000236036		PER1		25324200	24342840	27053096	2.55734e+07	1.3722e+06		1.73503	1.69981	1.85155	1.76213	0.0794175		0.953898	1.00199	1.79185	1.24925	0.470523
TRCN0000236033		PER1		12076312	9964040	10499360	1.08466e+07	1.09811e+06		0.903241	0.785558	0.745638	0.811479	0.0819363		0.977812	0.966202	0.94689	0.963635	0.0156201
TRCN0000244220		PER1		29186680	29822712	30293680	2.97677e+07	555547		2.183	2.3512	2.15138	2.22853	0.107409		1.01234	0.87782	0.871538	0.920568	0.0795428
TRCN0000235494		PMS1		7307768	6790632	6329976	6.80946e+06	489168		0.500675	0.474176	0.433232	0.469361	0.0339781		0.974434	1.02633	1.56357	1.18811	0.326193
TRCN0000235496		PMS1		12651160	15859192	15469056	1.46598e+07	1.75044e+06		0.866765	1.10742	1.05872	1.01097	0.127234		1.01613	1.00016	1.32287	1.11305	0.18188
TRCN0000235492		PMS1		9218608	9096432	9651192	9.32208e+06	291495		0.6895	0.717156	0.685403	0.697353	0.0172719		1.03285	1.0058	1.02855	1.0224	0.0145368
TRCN0000420228		PMS2		8582464	9295600	10718808	9.53229e+06	1.08766e+06		0.588008	0.649093	0.73361	0.656903	0.0731148		0.990697	1.01692	0.998949	1.00219	0.0134077
TRCN0000423170		PMS2		18273984	19834336	21397384	1.98352e+07	1.5617e+06		1.252	1.38499	1.46447	1.36715	0.107351		1.02075	1.01247	1.83895	1.29072	0.4748
TRCN0000425805		PMS2		27050824	27836280	28078640	27655248	537290		1.85332	1.94375	1.92174	1.90627	0.0471563		1.04318	1.02552	1.89527	1.32132	0.49713
TRCN0000118016		PMS2P5		12473088	12144904	17377304	13998432	2.93079e+06		0.854565	0.848054	1.18933	0.963982	0.195182		1.01399	0.97198	1.32145	1.10247	0.190796
TRCN0000118013		PMS2P5		13643904	14714616	18540488	1.5633e+07	2.57424e+06		0.93478	1.02749	1.26894	1.07707	0.172507		0.9765	1.00659	1.20316	1.06208	0.123099
TRCN0000118014		PMS2P5		13695784	13958304	16097624	14583904	1.31747e+06		1.02437	1.10046	1.14321	1.08935	0.060197		1.00949	1.04221	1.08484	1.04551	0.0377865
TRCN0000050364		PNKP		7150224	6423624	7392624	6988824	504260		0.534797	0.506434	0.525006	0.522079	0.0144061		1.02394	1.00403	0.973233	1.0004	0.0255499
TRCN0000233175		PNKP		10022328	8414832	9187496	9.20822e+06	803948		0.749614	0.66342	0.652473	0.688502	0.0532067		0.963982	0.903634	0.960555	0.942724	0.0338959
TRCN0000050367		PNKP		22898680	18647976	21908328	2.11517e+07	2.22408e+06		1.71269	1.47019	1.55587	1.57959	0.122977		1.01324	1.01217	1.05081	1.0254	0.0220096
TRCN0000310108		POLA1		13128888	9786672	11208976	1.13748e+07	1.67727e+06		0.981967	0.771574	0.796033	0.849858	0.115062		0.994198	0.897377	0.865066	0.91888	0.0671981
TRCN0000298738		POLA1		12299728	11693576	12169456	1.20543e+07	319075		0.919951	0.921913	0.864244	0.902036	0.0327436		0.95738	0.934073	0.94347	0.944974	0.0117262
TRCN0000295990		POLA1		15273640	13245088	11429352	1.3316e+07	1.92313e+06		1.14238	1.04423	0.811684	0.999433	0.16984		1.018	0.978863	0.911069	0.969309	0.0540994
TRCN0000007919		POLB		22943848	25533072	26727248	25068056	1.93409e+06		1.57194	1.78292	1.82925	1.72804	0.137152		0.957484	1.00171	2.10484	1.35468	0.650037
TRCN0000293190		POLB		13487720	13803520	14147296	1.38128e+07	329887		1.00881	1.08826	1.00471	1.03392	0.0471012		0.931363	0.950365	0.939339	0.940356	0.00954135
TRCN0000293249		POLB		18503800	12361280	18448048	1.64377e+07	3.5304e+06		1.38398	0.974555	1.31013	1.22289	0.218211		0.997331	0.7479	0.913723	0.886318	0.126954
TRCN0000352781		POLD1		12082032	12908568	13174832	1.27218e+07	569835		0.827772	0.901379	0.901704	0.876952	0.0425909		0.965202	0.924158	1.79775	1.22904	0.492948
TRCN0000342684		POLD1		14261656	11980584	11684928	1.26424e+07	1.4101e+06		1.06669	0.944541	0.829834	0.947022	0.118448		1.00317	0.968299	1.00058	0.990686	0.0194306
TRCN0000352782		POLD1		14775240	11418280	11858320	1.26839e+07	1.82443e+06		1.10511	0.900209	0.842148	0.949154	0.138142		1.00476	0.912159	0.952038	0.956319	0.046448
TRCN0000052973		POLE		12740784	13468544	15633952	13947760	1.50494e+06		0.872905	0.940481	1.07001	0.961132	0.100162		1.00243	0.991453	1.10184	1.03191	0.0608139
TRCN0000052975		POLE		15319960	15632680	15259648	15404096	200243		1.04961	1.0916	1.04439	1.06187	0.02588		0.888981	0.912533	1.81936	1.20696	0.530485
TRCN0000052976		POLE		4517416	5627440	6105536	5.4168e+06	814745		0.337877	0.443663	0.4336	0.405047	0.0583877		0.902578	0.974298	0.993853	0.95691	0.048058
TRCN0000233183		POLE2		7989744	7123600	6873800	7329048	585653		0.597588	0.56162	0.48816	0.549123	0.0557742		0.989261	0.901395	0.946277	0.945644	0.0439364
TRCN0000052986		POLE2		13836616	11194528	10420464	1.18172e+07	1.79118e+06		1.0349	0.882569	0.740035	0.885835	0.14746		0.971232	0.957467	0.967492	0.965397	0.00711745
TRCN0000233181		POLE2		16713976	12513096	14107088	14444720	2.12069e+06		1.25011	0.986524	1.00185	1.0795	0.147957		0.975312	0.919493	1.00077	0.965193	0.0415737
TRCN0000290536		POLG		4594400	3558336	4135632	4.09612e+06	519161		0.343635	0.280537	0.293702	0.305958	0.0332869		0.987797	0.984311	1.0476	1.00657	0.0355741
TRCN0000296705		POLG		10362440	7837136	8384016	8.8612e+06	1.32856e+06		0.775053	0.617874	0.595412	0.66278	0.0978778		1.01613	0.942101	0.941837	0.966688	0.0428146
TRCN0000052994		POLG		9001296	9347400	8633264	8.99399e+06	357124		0.673247	0.736943	0.613113	0.674434	0.0619235		0.988569	0.940142	0.986365	0.971692	0.0273449
TRCN0000053056		POLG2		12228216	12541376	14221832	1.29971e+07	1.07211e+06		0.837788	0.875739	0.973362	0.895629	0.0699415		1.03482	0.979844	1.74973	1.2548	0.429507
TRCN0000290537		POLG2		12565816	15094832	13310416	1.3657e+07	1.29965e+06		0.860918	1.05404	0.910983	0.941981	0.100224		1.01496	1.04131	1.10868	1.05499	0.0483336
TRCN0000053055		POLG2		26706784	26942392	28232064	2.72937e+07	821101		1.82975	1.88133	1.93224	1.88111	0.0512445		1.00128	1.00185	1.41297	1.1387	0.237525
TRCN0000218452		POLH		15192560	14926624	19154424	16424536	2.36789e+06		1.04088	1.0423	1.31096	1.13138	0.15552		0.92767	0.87184	1.53563	1.11171	0.368182
TRCN0000053008		POLH		17840544	16591384	19172680	1.78682e+07	1.29087e+06		1.2223	1.15854	1.3122	1.23102	0.0772007		0.99658	1.04559	1.49112	1.17776	0.272482
TRCN0000218306		POLH		22294104	20236168	23597176	2.20425e+07	1.69457e+06		1.52743	1.41305	1.61502	1.5185	0.101282		0.967604	0.919008	1.77066	1.21909	0.478293
TRCN0000437553		POLI		9839600	9284216	8585624	9236480	628349		0.674137	0.648298	0.587612	0.636682	0.0444168		0.948426	0.914905	1.19864	1.02066	0.155046
TRCN0000422458		POLI		9190024	10141168	11642392	10324528	1.23642e+06		0.629633	0.708137	0.796821	0.711531	0.0836458		1.01344	0.965769	1.53078	1.16999	0.313354
TRCN0000415528		POLI		24435576	24378056	24447104	2.44202e+07	36988.9		1.67415	1.70227	1.67319	1.6832	0.0165192		1.03288	1.0682	1.8736	1.32489	0.475522
TRCN0000115999		POLK		2157712	2225184	2128480	2.17046e+06	49596.1		0.161385	0.175432	0.151159	0.162659	0.0121864		1.01128	1.00907	1.05375	1.0247	0.0251777
TRCN0000116001		POLK		5485688	3771888	4705640	4.65441e+06	858048		0.410299	0.297373	0.334183	0.347285	0.0575917		1.00719	0.955721	0.941629	0.96818	0.0345091
TRCN0000115997		POLK		9782072	8832904	9632936	9.41597e+06	510427		0.731644	0.69638	0.684107	0.704044	0.0246779		0.953395	0.917904	0.909553	0.926951	0.023279
TRCN0000438695		POLL		11993584	10919160	12838896	1.19172e+07	962144		0.821712	0.762463	0.878712	0.820962	0.0581281		1.02903	0.978508	1.9734	1.32698	0.560389
TRCN0000425960		POLL		17599560	18886896	19949864	1.88121e+07	1.17694e+06		1.20579	1.31883	1.3654	1.29667	0.0820767		0.944948	0.910866	1.43615	1.09732	0.293931
TRCN0000053130		POLL		18999888	20505264	18037160	1.91808e+07	1.24395e+06		1.30173	1.43184	1.23449	1.32269	0.100331		0.984635	0.950115	1.66359	1.19945	0.402333
TRCN0000236265		POLM		6369736	7262200	7112920	6914952	478034		0.436408	0.507105	0.486818	0.476777	0.0364025		0.98772	1.01575	1.48748	1.16365	0.280796
TRCN0000236266		POLM		12960656	15254520	15351528	1.45222e+07	1.35324e+06		0.887969	1.06519	1.05068	1.00128	0.0983983		1.0183	0.981748	1.11367	1.03791	0.0681095
TRCN0000236263		POLM		12287088	12223368	14655600	13055352	1.38622e+06		0.919005	0.963682	1.0408	0.974497	0.0616152		1.02268	1.04277	1.08379	1.04974	0.0311468
TRCN0000435823		POLN		5226312	7892424	9258520	7.45909e+06	2.05073e+06		0.358069	0.551112	0.633666	0.514282	0.141442		0.980589	1.05769	1.57034	1.20287	0.320561
TRCN0000053079		POLN		17532600	20543112	19153752	19076488	1.50674e+06		1.20121	1.43448	1.31091	1.31553	0.116708		1.02021	1.04711	1.9156	1.32764	0.509364
TRCN0000053080		POLN		26883848	28825680	28797288	2.81689e+07	1.11301e+06		1.84188	2.01284	1.97093	1.94188	0.089101		0.934791	0.878576	1.31332	1.04223	0.236448
TRCN0000052999		POLQ		12477776	15071440	18789984	15446400	3.17277e+06		0.854886	1.05241	1.28601	1.06444	0.215815		0.980731	1.01306	1.88558	1.29312	0.513337
TRCN0000290547		POLQ		8799760	7756280	7873152	8143064	571710		0.658173	0.6115	0.559131	0.609601	0.049548		1.04303	0.93613	0.966742	0.981966	0.0550498
TRCN0000290550		POLQ		11175288	9017248	9498352	9.89696e+06	1.1329e+06		0.835849	0.710914	0.674549	0.740437	0.0846059		0.971574	0.96324	1.01784	0.984219	0.0294157
TRCN0000199917		PRKCG		9762064	9521544	7486480	8.92336e+06	1.25017e+06		0.594562	0.559808	0.511169	0.55518	0.0418889		0.984962	1.12682	0.916625	1.00947	0.107218
TRCN0000199544		PRKCG		14733976	14192888	11646336	13524400	1.6488e+06		0.897379	0.834455	0.7952	0.842344	0.0515444		0.974783	1.21531	0.895143	1.02841	0.166685
TRCN0000010693		PRKCG		25333112	26248808	18519696	2.33672e+07	4.22296e+06		1.54292	1.54327	1.26451	1.45023	0.160844		0.997052	1.26348	0.774696	1.01174	0.244724
TRCN0000197152		PRKDC		8298920	5584592	8096192	7326568	1.512e+06		0.500044	0.407663	0.53427	0.480659	0.0654919		0.951461	0.958685	0.969433	0.95986	0.00904311
TRCN0000194985		PRKDC		21439856	22226128	25428504	23031496	2.11277e+06		1.29184	1.62246	1.67803	1.53078	0.208783		0.956303	0.983356	1.00281	0.980824	0.0233576
TRCN0000194719		PRKDC		12275456	14536440	9807960	1.22066e+07	2.36499e+06		0.747642	0.854654	0.669677	0.757324	0.0928675		0.945567	1.21374	0.846037	1.00178	0.190186
TRCN0000299933		PRMT6		20650040	20986208	20849824	2.08287e+07	169077		1.24425	1.53195	1.37589	1.38403	0.144021		0.907391	0.980866	1.01228	0.966846	0.0538315
TRCN0000299935		PRMT6		15848968	10724568	10663048	1.24122e+07	2.97649e+06		0.965288	0.630539	0.728062	0.77463	0.172165		1.01373	1.07627	0.92882	1.00627	0.0740059
TRCN0000034687		PRMT6		17952424	14410904	13082560	1.51486e+07	2.51735e+06		1.0934	0.847273	0.893264	0.944645	0.130861		0.994541	1.1307	0.957616	1.02762	0.0911604
TRCN0000006592		PRPF19		9077144	6687152	9682208	8482168	1.58369e+06		0.546936	0.488147	0.638932	0.558005	0.0759993		1.00637	0.995716	0.933523	0.978537	0.0393457
TRCN0000272704		PRPF19		17624008	11424624	13986160	1.43449e+07	3.11523e+06		1.06192	0.833972	0.922951	0.939614	0.114884		1.01025	1.02043	0.93371	0.98813	0.0474023
TRCN0000006594		PRPF19		18287344	13685520	15368688	1.57805e+07	2.32839e+06		1.10189	0.999013	1.01418	1.03836	0.0555362		0.987432	0.953683	0.966944	0.969353	0.0170033
TRCN0000330398		RAD1		15237632	12938656	14349536	1.41753e+07	1.15935e+06		0.918131	0.944493	0.94693	0.936518	0.0159705		0.962122	0.955285	0.979734	0.965714	0.012614
TRCN0000330399		RAD1		15624816	14029504	15571968	1.50754e+07	906183		0.94146	1.02412	1.0276	0.997727	0.0487598		0.929214	0.9768	1.01795	0.974653	0.044405
TRCN0000330328		RAD1		19123496	19693800	18530488	19115928	581693		1.15227	1.4376	1.22283	1.2709	0.148616		0.959623	0.94851	0.947945	0.952026	0.0065852
TRCN0000018859		RAD17		2454400	2536968	2259808	2.41706e+06	142303		0.147888	0.185193	0.149125	0.160735	0.02119		1.00265	1.02906	1.00076	1.01082	0.0158265
TRCN0000280986		RAD17		7081944	6586456	7696296	7.12157e+06	555980		0.426717	0.480797	0.507881	0.471798	0.0413237		0.970904	0.969278	0.94831	0.962831	0.0126013
TRCN0000018858		RAD17		17556448	14976232	16261552	16264744	1.29011e+06		1.05785	1.09323	1.0731	1.07473	0.0177472		1.01174	0.948908	0.99921	0.98662	0.0332548
TRCN0000003468		RAD18		11663880	9904624	6738168	9.43556e+06	2.49613e+06		0.702797	0.723016	0.444654	0.623489	0.155205		1.0029	1.05549	0.915054	0.991149	0.0709534
TRCN0000003470		RAD18		5984680	15197720	18974696	1.33857e+07	6.68189e+06		0.360602	1.1094	1.25215	0.907383	0.478875		0.934905	0.961027	1.07451	0.990148	0.0742195
TRCN0000003469		RAD18		14828600	15968136	18585672	1.64608e+07	1.92638e+06		0.893485	1.16564	1.22647	1.0952	0.177318		0.975928	1.05643	1.03021	1.02086	0.0410583
TRCN0000148135		RAD21		7782768	5286592	4417768	5.82904e+06	1.74685e+06		0.468944	0.38591	0.29153	0.382128	0.0887676		0.973278	0.969075	0.929992	0.957448	0.0238705
TRCN0000281200		RAD21		7265792	6147224	9124096	7.51237e+06	1.50368e+06		0.437794	0.448734	0.602102	0.49621	0.0918681		0.908129	0.969804	0.977205	0.951713	0.0379257
TRCN0000281201		RAD21		9414832	9554536	9475896	9.48175e+06	70036		0.573414	0.561748	0.647004	0.594056	0.0462245		0.973399	1.13819	0.877779	0.996455	0.131726
TRCN0000318364		RAD23A		7359328	5679056	5395104	6144496	1.06161e+06		0.448223	0.333894	0.368372	0.383496	0.0586459		1.00192	1.11265	0.9436	1.01939	0.0858677
TRCN0000005972		RAD23A		16308608	14115048	10106872	13510176	3.1448e+06		0.993282	0.829878	0.690087	0.837749	0.151751		0.977109	1.22073	0.830382	1.00941	0.197167
TRCN0000005974		RAD23A		15567616	14673608	12187064	1.41428e+07	1.75168e+06		0.948152	0.862718	0.83212	0.880997	0.0601368		0.991356	1.14112	0.950041	1.02751	0.10054
TRCN0000003954		RAD23B		5574688	5178352	3791872	4848304	936113		0.339529	0.304455	0.258905	0.300963	0.0404251		0.970581	0.911132	0.895023	0.925578	0.0397965
TRCN0000003951		RAD23B		6684368	4440960	4278200	5.13451e+06	1.34468e+06		0.407114	0.261101	0.292111	0.320109	0.0769276		0.907238	1.01774	0.926415	0.950463	0.0590448
TRCN0000280042		RAD23B		5810912	5078816	4882648	5.25746e+06	489238		0.353916	0.298603	0.333382	0.328634	0.0279604		0.899299	0.813968	0.84385	0.852372	0.0432987
TRCN0000293673		RAD50		5791584	5227616	3950144	4.98978e+06	943477		0.352739	0.307352	0.269712	0.309934	0.0415737		0.901837	1.1729	0.919797	0.998179	0.151582
TRCN0000286222		RAD50		17455144	15362536	13609696	15475792	1.92522e+06		1.06311	0.903223	0.929256	0.965197	0.0857905		1.03652	1.28244	0.89473	1.07123	0.196171
TRCN0000293672		RAD50		21168904	16986680	18486704	1.88808e+07	2.11878e+06		1.2893	0.998713	1.26225	1.18342	0.160534		0.965051	0.92478	0.968225	0.952685	0.0242186
TRCN0000018879		RAD51		15489896	11605496	10524768	1.25401e+07	2.61116e+06		0.933331	0.847176	0.694533	0.825013	0.120932		0.956137	0.759862	0.763826	0.826608	0.112193
TRCN0000018877		RAD51		15368944	13556592	15651832	1.48591e+07	1.13686e+06		0.926043	0.989601	1.03287	0.982838	0.0537334		1.00575	0.96714	0.950207	0.974364	0.0284654
TRCN0000018876		RAD51		22522336	21056552	23678952	22419280	1.31423e+06		1.35706	1.53708	1.56258	1.48558	0.112022		1.01677	0.961918	1.03941	1.00603	0.0398445
TRCN0000152685		RAD51B		19504032	22591568	24112584	2.20694e+07	2.34823e+06		1.1752	1.64913	1.5912	1.47184	0.25853		1.00153	0.963251	1.01347	0.992748	0.0262337
TRCN0000378334		RAD51B		21229016	24116232	24945232	23430160	1.95079e+06		1.27914	1.76043	1.64614	1.5619	0.251463		0.999365	0.980722	0.974004	0.984697	0.0131394
TRCN0000368588		RAD51B		27468104	28816808	29305176	2.853e+07	951520		1.65507	2.10356	1.93386	1.8975	0.226448		0.97674	0.968717	0.901867	0.949108	0.0411086
TRCN0000146298		RAD51C		4561728	3843728	3357728	3.92106e+06	605714		0.277834	0.225988	0.229262	0.244361	0.0290344		0.983747	1.16781	0.975768	1.04244	0.108643
TRCN0000330043		RAD51C		5911680	7507424	7209528	6.87621e+06	848484		0.360053	0.441391	0.492259	0.431234	0.0666855		0.938507	1.07233	0.89273	0.967856	0.093328
TRCN0000330045		RAD51C		14577768	11235976	10399672	1.20711e+07	2.21071e+06		0.887865	0.660607	0.710079	0.75285	0.119514		0.903305	1.17681	0.843727	0.974613	0.177622
TRCN0000158391		RAD51D		25459496	26798232	26819720	2.63591e+07	779197		1.53404	1.95621	1.76984	1.75336	0.211567		0.960015	1.01951	0.990991	0.990173	0.0297579
TRCN0000158392		RAD51D		30300960	28507456	28580000	29129472	1.01519e+06		1.82576	2.08098	1.886	1.93091	0.133407		0.900061	0.942929	0.915854	0.919615	0.02168
TRCN0000153705		RAD51D		104664	139840	176512	140339	35926.6		0.0063746	0.00822173	0.0120521	0.0088828	0.00289588		0.462947	0.515863	0.245323	0.408045	0.143383
TRCN0000271350		RAD52		24282768	26595344	25854408	2.55775e+07	1.18089e+06		1.46314	1.9414	1.70614	1.70356	0.239142		0.929377	0.996005	1.06245	0.995944	0.0665361
TRCN0000018872		RAD52		12256456	13991192	9947480	1.2065e+07	2.02864e+06		0.746484	0.822596	0.679204	0.749428	0.0717417		1.00158	1.10637	0.948119	1.01869	0.0804996
TRCN0000018871		RAD52		16550168	17941848	16189456	16893824	925362		1.00799	1.05487	1.1054	1.05609	0.0487137		0.95797	1.04023	0.930482	0.976228	0.0571087
TRCN0000051311		RAD54B		11648288	9876920	11227440	1.09175e+07	925451		0.701858	0.720993	0.740902	0.721251	0.0195235		0.971115	0.980265	1.03519	0.995524	0.0346575
TRCN0000051312		RAD54B		21803648	19507232	18533072	19947984	1.67924e+06		1.31376	1.42398	1.223	1.32025	0.100648		0.937332	0.98606	0.995126	0.972839	0.0310826
TRCN0000330066		RAD54B		13107056	11683936	12470336	1.24204e+07	712871		0.798291	0.686944	0.851462	0.778899	0.0839557		0.912803	1.10311	0.934723	0.983545	0.104124
TRCN0000000229		RAD54L		12643064	9554840	7976016	1.0058e+07	2.37386e+06		0.770031	0.561766	0.544594	0.625464	0.125493		1.02322	1.17896	0.958221	1.05347	0.113438
TRCN0000436188		RAD54L		18930448	22613264	19687232	2.04103e+07	1.94497e+06		1.15297	1.32952	1.34422	1.27557	0.106432		0.987789	1.17983	0.864254	1.01062	0.15902
TRCN0000418537		RAD54L		29986128	32519808	23492272	2.86661e+07	4.65629e+06		1.82632	1.91197	1.60403	1.78077	0.158941		0.921902	1.18722	0.609895	0.906339	0.288977
TRCN0000018882		RAD9A		5614384	5656200	6333360	5.86798e+06	403572		0.33829	0.41289	0.41794	0.389707	0.0445998		0.964236	0.958591	0.970749	0.964525	0.00608424
TRCN0000427240		RAD9A		7998536	5717712	5207536	6307928	1.48617e+06		0.481945	0.41738	0.343647	0.414324	0.0691997		0.965627	0.985704	0.933316	0.961549	0.0264309
TRCN0000414202		RAD9A		11426120	8487120	9395440	9769560	1.50479e+06		0.688471	0.619541	0.620008	0.642673	0.0396628		0.985683	0.98732	1.0106	0.994534	0.0139373
TRCN0000021949		RASSF7		12686656	9630320	15175520	1.24975e+07	2.77744e+06		0.764424	0.702992	1.00144	0.822951	0.157596		0.931189	0.952013	1.0804	0.987867	0.0808096
TRCN0000021952		RASSF7		9110736	8691352	7322496	8.37486e+06	935187		0.554893	0.510998	0.499972	0.521955	0.0290534		1.00113	1.05666	0.898932	0.985573	0.0800053
TRCN0000021950		RASSF7		14566984	14652912	13981320	1.44004e+07	365473		0.887208	0.861501	0.95463	0.901113	0.0480962		0.96691	1.05891	0.839142	0.954987	0.110368
TRCN0000318737		RBBP8		12693480	13531032	14388128	1.35375e+07	847343		0.764835	0.987735	0.949477	0.900683	0.119192		0.940339	0.955819	0.947557	0.947905	0.00774573
TRCN0000005405		RBBP8		31424696	30764200	32107480	3.14321e+07	671671		1.89347	2.24572	2.11878	2.08599	0.1784		0.98257	1.00274	0.996537	0.993949	0.0103317
TRCN0000318738		RBBP8		16384232	15632232	13971976	15329480	1.2343e+06		0.997888	0.919079	0.953992	0.956987	0.0394897		1.03764	1.2484	0.988627	1.09156	0.138023
TRCN0000419333		RDM1		9762984	10594400	5652600	8.66999e+06	2.646e+06		0.594618	0.622886	0.385954	0.534486	0.129407		1.02309	1.29769	0.859942	1.06024	0.221228
TRCN0000414582		RDM1		9865096	8939184	8296864	9.03371e+06	788378		0.600838	0.525569	0.566501	0.564303	0.0376824		1.0085	1.1763	0.926216	1.037	0.127455
TRCN0000151957		RDM1		16454600	17736952	16826320	1.7006e+07	659779		1.00217	1.04282	1.14888	1.06463	0.075746		0.971235	1.1422	0.886324	0.999919	0.130326
TRCN0000052000		RECQL		14144704	12439544	12922888	1.3169e+07	878827		0.852277	0.908059	0.852785	0.871041	0.0320601		0.954623	0.915725	0.958783	0.943044	0.02375
TRCN0000052001		RECQL		17005344	13030752	12715024	1.42504e+07	2.39109e+06		1.02464	0.951216	0.839068	0.938309	0.093458		0.983107	1.00925	1.00343	0.998596	0.0137254
TRCN0000289589		RECQL		8254816	9004480	5601048	7.62011e+06	1.78829e+06		0.502763	0.529408	0.382434	0.471535	0.0783056		0.987028	1.16442	0.763912	0.971787	0.200688
TRCN0000356528		RECQL4		10060784	6548640	6356280	7.65523e+06	2.08549e+06		0.606204	0.478036	0.419453	0.501231	0.0955118		0.88452	0.890692	0.822271	0.865828	0.0378472
TRCN0000051169		RECQL4		14899992	17694920	14884104	1.58263e+07	1.61826e+06		0.897787	1.29169	0.982207	1.05723	0.207391		0.982749	1.02367	0.955503	0.987306	0.0343094
TRCN0000356454		RECQL4		21890832	22717864	21584848	2.20645e+07	586136		1.31901	1.65835	1.42439	1.46725	0.173683		0.96328	1.00065	0.938665	0.967532	0.0312115
TRCN0000051415		RECQL5		10010120	10979120	10244064	1.04111e+07	505635		0.603151	0.801452	0.676009	0.693537	0.100305		1.01064	1.04845	1.04142	1.03351	0.020112
TRCN0000236026		RECQL5		13474768	12583736	9319768	1.17928e+07	2.18752e+06		0.820686	0.739847	0.636344	0.732292	0.092403		0.997902	1.13632	0.937371	1.02386	0.101981
TRCN0000236025		RECQL5		18226168	17355624	14610088	1.67306e+07	1.88732e+06		1.11007	1.0204	0.997562	1.04268	0.0594709		0.915547	1.05683	0.937401	0.969925	0.0760481
TRCN0000152109		REV1		15200264	11677224	17189944	14689144	2.79168e+06		0.915879	0.852412	1.13437	0.967553	0.147911		0.936497	0.917596	1.07081	0.974968	0.0835388
TRCN0000155665		REV1		583528	949488	435784	656267	264464		0.03554	0.0558241	0.0297549	0.040373	0.0136901		0.533726	0.692382	0.435045	0.553718	0.129828
TRCN0000152138		REV1		11401440	8845056	8726192	9.65756e+06	1.51141e+06		0.694409	0.520035	0.595815	0.60342	0.0874355		0.997857	1.11224	0.932119	1.01407	0.091151
TRCN0000244438		REV3L		10521272	12150816	9770896	10814328	1.21672e+06		0.640802	0.714393	0.667147	0.674114	0.0372871		0.9459	1.21998	0.95086	1.03891	0.156828
TRCN0000244436		REV3L		16325656	17446672	11393592	1.50553e+07	3.22029e+06		0.994321	1.02576	0.777943	0.932674	0.13492		0.942103	1.01267	0.939268	0.964681	0.0415853
TRCN0000053127		REV3L		23121440	17816048	20733000	2.05568e+07	2.65708e+06		1.40822	1.04747	1.41563	1.29044	0.210448		0.952286	0.914443	0.877132	0.91462	0.0375773
TRCN0000034137		RNF168		8898208	7487104	8558856	8.31472e+06	736549		0.536154	0.546542	0.564802	0.549166	0.0145029		0.893751	0.91532	0.959997	0.923022	0.0337882
TRCN0000034136		RNF168		11419296	9950296	9242400	1.0204e+07	1.1104e+06		0.68806	0.72635	0.609909	0.674773	0.0593467		1.03987	1.03449	1.00029	1.02488	0.0214687
TRCN0000034138		RNF168		12467992	10765352	10498408	1.12439e+07	1.06845e+06		0.759368	0.632937	0.71682	0.703042	0.0643321		0.994878	1.19456	0.907303	1.03225	0.147231
TRCN0000293306		RNF8		10559432	9954056	8045904	9.5198e+06	1.31183e+06		0.63625	0.726624	0.530952	0.631275	0.097931		0.955807	1.01219	0.888961	0.95232	0.061689
TRCN0000298501		RNF8		14059056	8522040	7635784	1.00723e+07	3.48096e+06		0.847117	0.62209	0.503888	0.657698	0.174363		1.00328	0.98935	0.925812	0.972814	0.041296
TRCN0000003439		RNF8		11910792	13390504	12810280	1.27039e+07	745574		0.717675	0.977477	0.845354	0.846835	0.129908		0.954638	0.990759	0.954683	0.966693	0.0208412
TRCN0000010985		RPA1		4766912	5509072	2814600	4363528	1.39179e+06		0.307337	0.237675	0.167476	0.237496	0.0699306		0.832762	0.679675	0.669547	0.727328	0.0914487
TRCN0000318752		RPA1		17628344	17255464	17663744	1.75159e+07	226195		1.13655	0.744443	1.05104	0.977344	0.20618		0.998941	0.914138	0.945692	0.952924	0.0428618
TRCN0000318750		RPA1		17681208	17771992	17567064	1.76734e+07	102686		1.13996	0.766727	1.04529	0.983991	0.194019		0.965792	0.90642	0.952559	0.94159	0.0311687
TRCN0000220586		RPA2		10324456	10586536	10783160	1.05647e+07	230129		0.665648	0.456729	0.641626	0.588001	0.114317		0.997107	0.902706	0.889972	0.929928	0.058526
TRCN0000231924		RPA2		14586888	14690896	14697720	1.46585e+07	62112.8		0.94046	0.633801	0.874552	0.816271	0.161423		0.951943	0.889463	0.888136	0.909847	0.036462
TRCN0000220587		RPA2		16244568	15250472	16317232	15937424	596026		1.04733	0.657943	0.970917	0.892065	0.206325		0.990788	0.857365	0.888378	0.912177	0.0698226
TRCN0000018861		RPA3		10250040	12206368	9746392	1.07343e+07	1.29951e+06		0.66085	0.526613	0.579935	0.589133	0.0675897		0.956288	0.861928	0.875604	0.89794	0.0509913
TRCN0000018863		RPA3		12330768	13989224	14231744	1.35172e+07	1.03465e+06		0.795001	0.60353	0.846825	0.748452	0.128153		0.959157	0.840115	0.843757	0.88101	0.0677023
TRCN0000018860		RPA3		22715168	23080512	22086712	22627464	502671		1.46451	0.99575	1.31422	1.25816	0.239356		1.01757	0.909662	0.945425	0.957554	0.0549683
TRCN0000424719		RPA4		6814280	6606392	6567952	6.66287e+06	132522		0.439337	0.285016	0.39081	0.371721	0.0789114		1.05971	0.994725	0.927683	0.994038	0.0660147
TRCN0000413576		RPA4		8049440	9562184	8986640	8866088	763543		0.518971	0.412536	0.534728	0.488745	0.0664675		0.89315	0.894886	0.819489	0.869175	0.0430379
TRCN0000163341		RPA4		12169008	18279360	13040184	14496184	3.30516e+06		0.784572	0.788617	0.775924	0.783038	0.00648363		0.991053	0.869136	0.924731	0.928307	0.0610373
TRCN0000137422		RPAIN		13597824	8447624	11794456	11279968	2.61336e+06		0.901998	0.822003	0.532809	0.75227	0.194222		0.906405	0.88899	0.838606	0.878001	0.0352099
TRCN0000135585		RPAIN		13154024	11632352	18140376	1.43089e+07	3.40425e+06		0.872559	1.1319	0.819483	0.941312	0.16717		0.959998	1.03215	1.01908	1.00374	0.038445
TRCN0000134091		RPAIN		27139056	22380096	27980304	25833152	3.01987e+06		1.80024	2.17771	1.264	1.74732	0.459152		0.982922	0.950553	0.916749	0.950075	0.033089
TRCN0000117607		RPS27L		6702360	5345576	6586064	6.21133e+06	752019		0.444594	0.520156	0.297522	0.420757	0.113215		0.940265	0.887885	0.937811	0.921987	0.0295586
TRCN0000117610		RPS27L		10514000	9263072	18484152	1.27537e+07	5.00194e+06		0.697436	0.901351	0.835013	0.811266	0.104011		0.910101	0.813905	0.935305	0.886437	0.0640666
TRCN0000117611		RPS27L		11830888	7761936	25683224	15092016	9.39518e+06		0.78479	0.755281	1.16023	0.9001	0.22576		0.859384	0.67465	0.864042	0.799359	0.108026
TRCN0000286352		RRM2		9031448	7965536	18881072	11959352	6.01803e+06		0.599092	0.775093	0.852943	0.742376	0.13005		0.919725	0.976809	0.969508	0.955347	0.0310646
TRCN0000286353		RRM2		7705384	8457248	7698384	7953672	436124		0.496789	0.364867	0.458074	0.43991	0.0678109		0.985209	0.894109	0.909656	0.929658	0.0487322
TRCN0000038960		RRM2		13800128	12089480	12446792	12778800	902359		0.889735	0.52157	0.740616	0.717307	0.185186		0.997559	0.880863	0.834502	0.904308	0.0840188
TRCN0000343036		RRM2B		5069440	2506376	5116448	4.23075e+06	1.49354e+06		0.336276	0.243885	0.231133	0.270431	0.0573786		0.972349	0.800137	1.0065	0.926328	0.110611
TRCN0000046562		RRM2B		12696184	6827776	16052720	1.18589e+07	4.66912e+06		0.842189	0.664382	0.725174	0.743915	0.0903725		0.991309	0.788544	0.921434	0.900429	0.103002
TRCN0000343037		RRM2B		12645280	8955424	13007168	1.1536e+07	2.24212e+06		0.838812	0.871415	0.587593	0.76594	0.155311		0.919303	0.740559	0.964088	0.87465	0.118266
TRCN0000051672		RTEL1		8289432	7816488	7726832	7.94425e+06	302278		0.549871	0.76059	0.349056	0.553172	0.205787		1.03825	0.981991	0.879218	0.966488	0.0806437
TRCN0000051669		RTEL1		15295104	13673432	20548480	16505672	3.59384e+06		1.01459	1.3305	0.928268	1.09112	0.211758		0.960232	0.849442	0.943092	0.917589	0.0596357
TRCN0000051668		RTEL1		12571728	15578680	13352040	1.38341e+07	1.56037e+06		0.810536	0.672103	0.794481	0.75904	0.0757166		0.974964	0.947726	0.94147	0.95472	0.0178085
TRCN0000292041		RUVBL2		9828256	8253672	7905176	8662368	1.02461e+06		0.633657	0.356084	0.470378	0.486706	0.139505		0.994934	0.852328	0.901481	0.916247	0.0724409
TRCN0000051563		RUVBL2		15486424	18180536	15612832	1.64266e+07	1.52027e+06		0.998455	0.784353	0.929004	0.903937	0.10923		1.02474	0.889932	0.976813	0.963828	0.0683356
TRCN0000292038		RUVBL2		16842536	15857088	15925232	1.62083e+07	550333		1.08589	0.684114	0.947592	0.905865	0.204111		1.01388	0.923765	0.955175	0.964274	0.0457417
TRCN0000083697		SEM1		10603184	5315512	12227304	9382000	3.6141e+06		0.703351	0.51723	0.552363	0.590981	0.0988881		1.02553	0.997544	1.06347	1.02885	0.0330891
TRCN0000083693		SEM1		7682704	8503904	10083392	8.75667e+06	1.22014e+06		0.495326	0.366879	0.599988	0.487398	0.116756		1.02237	0.88487	0.91438	0.940539	0.0723849
TRCN0000291695		SEM1		9572760	7269688	9650448	8.83097e+06	1.35266e+06		0.617184	0.313632	0.574226	0.501681	0.164265		0.832352	0.901021	0.897792	0.877055	0.0387476
TRCN0000146999		SETMAR		12173152	8725512	21205616	14034760	6.44495e+06		0.807494	0.849043	0.957954	0.871497	0.0777024		1.02751	0.904276	0.963382	0.965056	0.0616347
TRCN0000276149		SETMAR		17217608	13453480	24278392	1.83165e+07	5.49548e+06		1.14211	1.3091	1.09676	1.18266	0.111825		0.90744	0.63535	0.964222	0.835671	0.17579
TRCN0000179441		SETMAR		18340504	27534944	20849880	22241776	4.75263e+06		1.18247	1.18793	1.24062	1.20367	0.0321163		1.02613	1.05141	1.02578	1.03444	0.0146936
TRCN0000051516		SETX		32243280	28845424	32418328	3.1169e+07	2.01419e+06		2.13883	2.80683	1.46448	2.13671	0.671175		0.920293	0.798959	1.02567	0.914974	0.113449
TRCN0000051514		SETX		5484952	5233440	5262968	5327120	137482		0.353631	0.225783	0.31316	0.297525	0.0653421		1.02336	0.976635	0.90936	0.969786	0.0573089
TRCN0000435730		SETX		19527504	21116272	17428624	1.93575e+07	1.84969e+06		1.259	0.911008	1.03705	1.06902	0.176183		0.979027	0.809569	0.875388	0.887995	0.0854295
TRCN0000018983		SIRT1		14277928	11346304	23530472	1.63849e+07	6.35948e+06		0.947112	1.10406	1.06298	1.03805	0.0813898		0.935441	0.838412	1.03619	0.936682	0.0988954
TRCN0000229630		SIRT1		21382120	21440336	17572128	20131528	2.2167e+06		1.37857	0.924989	1.04559	1.11638	0.234931		0.95816	0.953821	0.876811	0.929597	0.0457659
TRCN0000218734		SIRT1		23832240	25442360	23622384	2.4299e+07	995727		1.53653	1.09765	1.40559	1.34659	0.225315		0.977343	0.90475	0.921202	0.934432	0.0380622
TRCN0000254861		SLX1A		15694008	11462968	17352040	1.48363e+07	3.03677e+06		0.799511	0.89624	0.995511	0.897087	0.0980032		1.01911	0.926536	0.994116	0.979921	0.0478914
TRCN0000265622		SLX1A		27285544	26388840	27761264	27145216	696890		1.39003	2.06323	1.5927	1.68199	0.345369		0.972393	0.941352	0.983767	0.965837	0.021954
TRCN0000254863		SLX1A		29986624	27992496	30210984	2.93967e+07	1.22124e+06		1.52763	2.18861	1.73325	1.8165	0.338265		1.05263	0.9471	1.06387	1.0212	0.0644161
TRCN0000062557		SMC1A		6189096	6103200	5768800	6.02037e+06	222055		0.399029	0.263307	0.343258	0.335198	0.0682191		1.02966	0.875747	0.877281	0.927562	0.0884213
TRCN0000299440		SMC1A		8126152	8090984	6525192	7580776	914332		0.523917	0.349065	0.388266	0.420416	0.0917525		1.01696	0.976208	0.939877	0.977682	0.0385634
TRCN0000062554		SMC1A		17057816	14562120	13573344	1.50644e+07	1.79572e+06		1.09977	0.628246	0.807649	0.845221	0.237996		1.00645	0.964208	0.926348	0.965667	0.0400685
TRCN0000219076		SMC3		5687760	5522984	7066464	6.0924e+06	847576		0.377292	0.537418	0.319224	0.411311	0.113005		0.948749	0.951134	0.942948	0.94761	0.00421044
TRCN0000234318		SMC3		6986032	4437784	8655344	6.69305e+06	2.12399e+06		0.463411	0.431822	0.391001	0.428745	0.0363031		0.924937	0.87536	0.956881	0.919059	0.0410773
TRCN0000234320		SMC3		15330424	12567960	14509904	14136096	1.41866e+06		1.01693	1.22294	0.655478	0.965114	0.287255		0.917256	0.897813	0.71353	0.842866	0.11243
TRCN0000219950		SMC6		20238968	12445472	27573176	20085872	7.56501e+06		1.34253	1.21102	1.24561	1.26638	0.0681753		0.964099	0.902928	1.01904	0.962023	0.0580851
TRCN0000419080		SMC6		26873456	22730824	26099616	25234632	2.20261e+06		1.78262	2.21184	1.17904	1.7245	0.518849		0.938008	0.960857	0.908446	0.93577	0.0262769
TRCN0000437755		SMC6		29357792	22852352	32733640	2.83146e+07	5.02256e+06		1.94742	2.22367	1.47873	1.88327	0.37659		0.960224	0.925891	1.04659	0.977569	0.0621907
TRCN0000157912		SMUG1		11479856	7359768	12384088	10407904	2.6782e+06		0.761505	0.716148	0.559445	0.679033	0.10602		0.896212	0.933572	0.795639	0.875141	0.0713398
TRCN0000157730		SMUG1		16427080	12327568	20175640	16310096	3.92534e+06		1.08967	1.19954	0.911425	1.06688	0.145406		0.897445	0.91151	0.845032	0.884662	0.035034
TRCN0000158275		SMUG1		18404272	12856072	26987000	1.94158e+07	7.11956e+06		1.22083	1.25097	1.21912	1.23031	0.0179144		0.99831	1.04313	1.02944	1.02363	0.0229688
TRCN0000018344		SOD1		11620072	5970008	17087672	1.15593e+07	5.55908e+06		0.770806	0.580916	0.771927	0.707883	0.109958		0.834339	0.716439	0.863806	0.804861	0.0779808
TRCN0000221569		SOD1		24075360	19551856	30647808	2.47583e+07	5.57942e+06		1.59701	1.90251	1.3845	1.62801	0.260392		0.853398	0.832735	0.808898	0.831677	0.0222687
TRCN0000221565		SOD1		8609752	9757640	11100808	9.82273e+06	1.2468e+06		0.555096	0.420969	0.660527	0.54553	0.120065		0.963869	0.968757	0.923808	0.952144	0.0246613
TRCN0000049363		SPO11		14336104	9792280	19472904	1.45338e+07	4.84334e+06		0.950971	0.952846	0.879679	0.927832	0.0417121		0.905025	0.756676	0.779939	0.81388	0.079786
TRCN0000049364		SPO11		14977760	11206544	19152208	1.51122e+07	3.97454e+06		0.993535	1.09046	0.865192	0.983063	0.112999		0.972416	0.922597	1.04559	0.9802	0.0618627
TRCN0000049366		SPO11		2147483646	2147483646	28060208	1.44101e+09	1.22365e+09		142.451	208.963	1.26761	117.56	106.061		0.902851	0.862173	0.837993	0.867672	0.0327768
TRCN0000285552		TADA3		14473688	8506032	14145560	1.23751e+07	3.35472e+06		0.960097	0.827686	0.639019	0.808934	0.161359		0.910596	0.7081	0.94701	0.855235	0.128717
TRCN0000015733		TADA3		19253256	11700200	22537152	1.78302e+07	5.55686e+06		1.27715	1.1385	1.01811	1.14458	0.129627		1.05434	0.764898	0.987689	0.935644	0.15158
TRCN0000276386		TADA3		22617424	20686536	24244048	2.2516e+07	1.78092e+06		1.45821	0.892468	1.44258	1.26442	0.322215		0.96126	0.804369	0.912142	0.89259	0.0802521
TRCN0000280087		TCEA1		7747024	4882560	9592664	7407416	2.37335e+06		0.513891	0.475101	0.433344	0.474112	0.0402826		0.929385	0.884716	0.93514	0.916414	0.0276017
TRCN0000280020		TCEA1		15004624	13677976	12598296	1.37603e+07	1.20527e+06		0.995317	1.33095	0.569122	0.965128	0.381808		1.02117	0.974931	0.963176	0.986426	0.0306574
TRCN0000297755		TCEA1		15780224	16391256	17515640	1.65624e+07	880272		1.0174	0.707159	1.04223	0.922261	0.186697		0.994274	0.947076	0.940241	0.96053	0.0294218
TRCN0000274967		TDG		6556088	4034432	4569088	5.0532e+06	1.32871e+06		0.42269	0.174055	0.271872	0.289539	0.125255		0.988357	0.839559	0.902296	0.910071	0.0747031
TRCN0000150193		TDG		15076920	14528744	14885064	1.48302e+07	278169		0.972053	0.626806	0.8857	0.828186	0.179666		1.03732	0.930769	0.978067	0.982051	0.0533852
TRCN0000275034		TDG		28860128	25878808	28017808	2.75856e+07	1.53694e+06		1.8607	1.11648	1.66713	1.5481	0.386125		1.01199	0.906527	0.97021	0.962908	0.0531083
TRCN0000307785		TDP1		8269016	4304952	7135400	6.56979e+06	2.04166e+06		0.548517	0.418897	0.322338	0.429917	0.113491		0.952063	0.601936	0.915078	0.823026	0.192361
TRCN0000291884		TDP1		18222120	12580616	25487344	18763360	6.47036e+06		1.20875	1.22417	1.15138	1.19476	0.0383557		0.943631	0.69796	0.968641	0.870077	0.149581
TRCN0000291883		TDP1		21331360	17760408	21464536	2.01854e+07	2.10119e+06		1.41499	1.72819	0.96965	1.37094	0.381184		0.967873	0.756827	1.02029	0.914996	0.139463
TRCN0000314715		TDP2		387392	5421280	8574640	4.79444e+06	4.12946e+06		0.0249763	0.233887	0.510213	0.256359	0.243398		0.113906	0.677268	0.893911	0.561695	0.402641
TRCN0000314638		TDP2		10304464	6656608	9981528	8.98087e+06	2.01933e+06		0.664359	0.287182	0.593927	0.515156	0.200547		1.03691	0.766006	0.95242	0.918447	0.138612
TRCN0000003075		TDP2		13725792	12146040	12606936	12826256	812392		0.884942	0.52401	0.750145	0.719699	0.182382		1.02962	0.894585	0.943656	0.955953	0.068351
TRCN0000073283		TNP1		16834296	10946880	22762296	16847824	5.90772e+06		1.11669	1.06519	1.02828	1.07005	0.0444048		1.01992	0.929785	0.96391	0.971206	0.04551
TRCN0000073284		TNP1		18540960	13930344	24818384	1.90966e+07	5.46524e+06		1.2299	1.3555	1.12116	1.23552	0.117273		0.948193	0.890245	0.962937	0.933792	0.0384266
TRCN0000073286		TNP1		6432240	7623152	9060040	7705144	1.31582e+06		0.414705	0.328882	0.539096	0.427561	0.105695		0.999737	0.941897	0.984855	0.975496	0.0300342
TRCN0000049280		TOP2A		15647928	10697416	22641544	1.6329e+07	6.00112e+06		1.03799	1.04092	1.02282	1.03391	0.0097149		0.949191	0.726229	0.954793	0.876738	0.130374
TRCN0000290998		TOP2A		20526056	12376584	22052928	1.83185e+07	5.20219e+06		1.36158	1.20431	0.99623	1.18737	0.183261		0.933878	0.806588	0.958089	0.899519	0.0813854
TRCN0000049279		TOP2A		23378016	18433032	28994656	2.36019e+07	5.28437e+06		1.55076	1.79364	1.30982	1.55141	0.241911		0.919529	0.750087	0.985598	0.885071	0.121478
TRCN0000049405		TOPBP1		20308536	20032016	27379264	22573272	4.16441e+06		1.34715	1.94923	1.23685	1.51107	0.383442		0.944284	0.797996	0.983166	0.908482	0.0976387
TRCN0000049404		TOPBP1		28003072	20649120	31754832	2.68023e+07	5.64938e+06		1.85756	2.00928	1.43451	1.76711	0.297867		1.01668	0.70252	0.933267	0.884154	0.162734
TRCN0000049406		TOPBP1		10048416	13702520	11304504	1.16851e+07	1.85655e+06		0.647851	0.59116	0.672647	0.637219	0.0417707		1.04428	1.02794	1.00558	1.02593	0.0194255
TRCN0000342335		TP53		6074576	5160200	9140800	6.79186e+06	2.08499e+06		0.402951	0.502117	0.412931	0.439333	0.0546012		0.911852	0.969979	0.973188	0.951673	0.0345235
TRCN0000342259		TP53		18282640	12519008	19632056	1.68112e+07	3.77791e+06		1.17874	0.540101	1.16816	0.962331	0.365701		0.973996	0.643396	0.91026	0.842551	0.175393
TRCN0000342334		TP53		21242672	17387472	19698184	19442776	1.94025e+06		1.36958	0.750138	1.17209	1.09727	0.316425		1.00422	0.81525	0.842232	0.887233	0.102205
TRCN0000218999		TP53BP1		2147483646	32706040	2147483646	1.44256e+09	1.22097e+09		142.451	3.18249	97.0115	80.8817	71.0216		0.90069	0.958065	0.96811	0.942288	0.0363737
TRCN0000229640		TP53BP1		7207904	7475912	7354968	7.34626e+06	134216		0.464715	0.322529	0.43764	0.408295	0.0754985		1.01161	0.947411	0.957039	0.97202	0.0346222
TRCN0000018869		TP53BP1		7209840	8990416	6360544	7.52027e+06	1.34214e+06		0.46484	0.387869	0.378469	0.410392	0.0473863		1.03041	0.945064	0.906364	0.960613	0.0634684
TRCN0000272527		TP73		11417640	9138128	7494016	9349928	1.97037e+06		0.810369	0.698309	0.536532	0.681736	0.137669		1.11054	0.984137	0.961324	1.01867	0.0803768
TRCN0000006511		TP73		15498136	14808496	15216176	1.51743e+07	346725		1.09998	1.13162	1.0894	1.107	0.0219694		1.0818	1.11296	0.95018	1.04832	0.0864046
TRCN0000272526		TP73		29969472	29547184	27529544	29015400	1.304e+06		2.12709	2.25791	1.97097	2.11865	0.143655		1.00529	0.995425	0.903173	0.967963	0.0563264
TRCN0000007902		TREX1		9508856	10832136	10730744	1.03572e+07	736474		0.621503	0.759866	0.737965	0.706445	0.0743725		0.957274	0.948201	1.09338	0.999618	0.0813268
TRCN0000315361		TREX1		16019936	15927416	15173112	1.57068e+07	464515		1.04707	1.1173	1.04347	1.06928	0.0416231		0.954612	0.927313	0.97614	0.952688	0.02447
TRCN0000315303		TREX1		15472584	15218776	18480592	1.63907e+07	1.81439e+06		1.01129	1.06759	1.27093	1.1166	0.136582		0.953121	0.908565	0.932439	0.931375	0.0222972
TRCN0000426635		TREX2		598368	405488	291024	431627	155330		0.0424693	0.0309862	0.0208358	0.0314304	0.0108236		0.305879	0.23079	0.31986	0.28551	0.0479015
TRCN0000007903		TREX2		14649104	11158208	9023480	11610264	2.83993e+06		1.03972	0.852677	0.646033	0.846144	0.196926		1.08439	1.01084	0.913801	1.00301	0.0855659
TRCN0000415200		TREX2		4650808	5535576	5726760	5.30438e+06	574026		0.303979	0.388317	0.393835	0.362044	0.0503613		0.951098	1.01823	1.01998	0.996436	0.039274
TRCN0000018002		TRIM28		9007400	10453096	7461120	8973872	1.49627e+06		0.588727	0.733277	0.513109	0.611704	0.111868		0.927968	0.965496	1.07412	0.989195	0.0759029
TRCN0000017998		TRIM28		8818304	10165896	8744024	9.24274e+06	800338		0.576368	0.71313	0.601336	0.630278	0.0728299		1.0092	1.02647	1.07758	1.03775	0.0355613
TRCN0000018001		TRIM28		12133624	12001328	13841688	12658880	1.02648e+06		0.793059	0.841884	0.951908	0.862284	0.0813657		0.973553	0.952923	1.11933	1.01527	0.0907079
TRCN0000022063		TRIP13		10641848	5860736	5796536	7433040	2.77909e+06		0.755307	0.44786	0.415001	0.539389	0.18771		1.06339	1.04336	0.989561	1.0321	0.0381803
TRCN0000022061		TRIP13		14022632	14312624	11816480	13383912	1.36516e+06		0.916525	1.00402	0.812632	0.911059	0.0958109		0.94772	0.893169	1.02781	0.956234	0.0677246
TRCN0000022059		TRIP13		13153952	14475288	13070200	13566480	788164		0.859748	1.01543	0.898852	0.924677	0.0809907		0.820605	0.791174	0.837755	0.816511	0.0235591
TRCN0000045664		TYMS		11403872	5618256	5732008	7584712	3.30798e+06		0.809391	0.42933	0.410381	0.549701	0.225098		1.04759	1.01572	0.948742	1.00402	0.0504525
TRCN0000045665		TYMS		11179552	9971112	9313240	1.01546e+07	946594		0.79347	0.761963	0.666779	0.740737	0.065959		1.09306	1.03757	0.892464	1.0077	0.103582
TRCN0000045663		TYMS		16866936	11350920	9270808	1.24962e+07	3.92544e+06		1.19713	0.867404	0.663741	0.909426	0.269168		1.12893	1.05666	1.01876	1.06812	0.0559713
TRCN0000010842		UBE2A		8887120	8032984	6942200	7.9541e+06	974857		0.580866	0.563508	0.477423	0.540599	0.0553962		0.988722	0.992223	1.09008	1.02367	0.0575336
TRCN0000350341		UBE2A		18104936	18507640	18726840	18446472	315432		1.18335	1.2983	1.28787	1.2565	0.06357		0.978094	0.949685	1.06932	0.999032	0.0625042
TRCN0000320582		UBE2A		25113976	25600256	25115096	2.52764e+07	280431		1.64146	1.79584	1.72719	1.7215	0.077347		0.949557	0.938564	1.0913	0.993142	0.0851882
TRCN0000272873		UBE2B		18448880	12920408	11441000	14270096	3.69376e+06		1.30941	0.987339	0.819115	1.03862	0.249139		1.11317	0.968284	0.9818	1.02108	0.080033
TRCN0000004010		UBE2B		15676832	16314520	13978192	1.53232e+07	1.20765e+06		1.11267	1.24671	1.00076	1.12005	0.123137		0.955822	1.02635	0.933645	0.971939	0.048408
TRCN0000004012		UBE2B		25121832	23884704	23920616	2.43091e+07	704118		1.78303	1.8252	1.71259	1.7736	0.0568926		0.992134	0.974349	0.977618	0.981367	0.00946687
TRCN0000007215		UBE2N		23899224	20761760	19816784	2.14926e+07	2.13709e+06		1.69625	1.58655	1.41878	1.56719	0.139746		1.06069	1.03236	0.932585	1.00855	0.0672935
TRCN0000368937		UBE2N		25478440	22349632	21104280	2.29775e+07	2.25365e+06		1.80834	1.70789	1.51095	1.67573	0.151277		1.10613	1.03048	0.947757	1.02812	0.0792117
TRCN0000007216		UBE2N		16501232	16324048	16691896	1.65057e+07	183965		1.07853	1.14512	1.14792	1.12386	0.0392805		0.916737	0.982035	1.0562	0.984991	0.0697795
TRCN0000033705		UBE2V1		5559800	5124872	6700072	5.79491e+06	813494		0.394608	0.391628	0.47969	0.421975	0.0500046		1.08291	1.09053	0.98431	1.05258	0.0592493
TRCN0000033707		UBE2V1		15118360	14265872	10955008	1.34464e+07	2.19932e+06		0.988142	1.00074	0.753388	0.91409	0.139315		0.827798	0.820217	0.681762	0.776592	0.082213
TRCN0000033708		UBE2V1		26668936	26261584	23893064	2.56079e+07	1.49896e+06		1.74309	1.84223	1.64315	1.74282	0.0995396		0.992578	0.944061	1.03781	0.991485	0.0468867
TRCN0000004036		UBE2V2		14545624	10972416	8930400	1.14828e+07	2.84219e+06		1.03238	0.838479	0.639369	0.836742	0.19651		1.1137	1.07697	0.907567	1.03275	0.109953
TRCN0000004037		UBE2V2		17235080	14484184	12691272	14803512	2.28867e+06		1.22326	1.10684	0.908628	1.07958	0.159079		1.10331	1.08271	0.962307	1.04944	0.0761613
TRCN0000273330		UBE2V2		17243712	20692984	20301656	19412784	1.88863e+06		1.12706	1.4516	1.39617	1.32494	0.173599		0.864966	0.962148	0.871221	0.899445	0.0543923
TRCN0000303784		UIMC1		8970096	9867648	7695424	8.84439e+06	1.09155e+06		0.586289	0.692208	0.529223	0.602573	0.082704		0.971595	0.942799	1.03409	0.982828	0.0466699
TRCN0000303786		UIMC1		15950672	14773424	15413872	1.53793e+07	589384		1.04254	1.03634	1.06003	1.04631	0.0122822		0.949877	0.93712	1.12573	1.00424	0.105403
TRCN0000299976		UIMC1		17359040	18411416	16125008	17298488	1.14441e+06		1.13459	1.29155	1.10893	1.17836	0.0988603		1.03561	0.978477	1.11237	1.04215	0.067188
TRCN0000296982		UNG		5142856	7592160	5855760	6.19693e+06	1.25979e+06		0.336139	0.532584	0.402707	0.42381	0.0999084		0.973248	1.05276	1.04267	1.02289	0.0432886
TRCN0000331100		UNG		10634504	10304880	11348432	1.07626e+07	533439		0.695075	0.72288	0.780444	0.7328	0.0435402		0.957415	0.870175	1.02877	0.952119	0.0794279
TRCN0000082900		UNG		13934520	14344192	13221968	13833560	567883		0.910766	1.00623	0.909289	0.942096	0.05555		0.974678	0.93483	1.02025	0.976585	0.0427416
TRCN0000431324		UPF1		5801600	3637800	2751736	4063712	1.56891e+06		0.411769	0.27799	0.19701	0.29559	0.108456		1.03495	0.970181	0.958173	0.987767	0.0412967
TRCN0000415625		UPF1		21086360	18182968	19391984	1.95538e+07	1.45844e+06		1.49661	1.38949	1.38836	1.42482	0.0621726		1.12576	1.04157	0.955151	1.04083	0.0853047
TRCN0000412485		UPF1		24492256	22373432	20104208	2.23233e+07	2.19445e+06		1.73834	1.70971	1.43935	1.62914	0.164978		0.963075	0.947064	0.767276	0.892472	0.108718
TRCN0000004046		USP1		5903808	9624576	7864072	7.79749e+06	1.86128e+06		0.385875	0.675157	0.540821	0.533951	0.144763		0.965105	1.06812	1.08339	1.03887	0.0643392
TRCN0000342332		USP1		23147264	24886808	22286016	2.344e+07	1.32488e+06		1.51291	1.74579	1.53263	1.59711	0.129136		0.958481	0.960766	1.03723	0.985492	0.0448194
TRCN0000342331		USP1		23951264	24916120	26096912	2.49881e+07	1.07463e+06		1.56546	1.74785	1.79471	1.70267	0.121116		0.914574	0.866818	1.05148	0.944291	0.0958513
TRCN0000377200		UVRAG		7863160	8238760	5315256	7.13906e+06	1.59059e+06		0.513939	0.577943	0.365536	0.485806	0.108962		0.993872	0.985598	1.03228	1.00392	0.0249116
TRCN0000005201		UVRAG		19940920	20007776	18536976	19495224	830540		1.30335	1.40353	1.27481	1.32723	0.0676028		0.972728	0.895323	1.03961	0.969221	0.0722082
TRCN0000368916		UVRAG		22275440	24102584	23695968	2.3358e+07	959313		1.45593	1.69078	1.6296	1.5921	0.12183		0.931423	0.888426	1.05506	0.958301	0.0865057
TRCN0000420053		VCP		19744768	12746264	16547712	16346248	3.5036e+06		1.40139	0.974032	1.18473	1.18672	0.213685		1.07331	1.02003	0.996614	1.02998	0.0393053
TRCN0000413258		VCP		20706592	18924416	19972944	19867984	895712		1.46965	1.44615	1.42996	1.44859	0.0199603		1.14677	1.05262	0.939284	1.04623	0.103893
TRCN0000412296		VCP		23299544	18129760	18256528	1.98953e+07	2.94886e+06		1.65369	1.38542	1.30707	1.44873	0.181774		1.12574	1.12026	0.968612	1.07154	0.0891776
TRCN0000426872		WRN		6992688	6790376	6159360	6.64747e+06	434654		0.457045	0.47634	0.423586	0.452324	0.026692		0.990737	0.954742	1.04404	0.996505	0.044926
TRCN0000004902		WRN		14839560	15194256	13986144	14673320	620975		0.96992	1.06587	0.961842	0.999209	0.0578673		0.955502	0.987653	1.08691	1.01002	0.068502
TRCN0000427430		WRN		15718376	15756056	14707128	1.53939e+07	595020		1.02736	1.10528	1.01143	1.04802	0.0502207		0.979567	0.977598	1.03268	0.996614	0.0312473
TRCN0000234557		XAB2		9714176	9387672	10734080	9.94531e+06	702332		0.689465	0.717378	0.768503	0.725115	0.0400831		1.08222	1.01844	0.92789	1.00951	0.0775507
TRCN0000234556		XAB2		26311440	22378536	22751736	23813904	2.17096e+06		1.86746	1.7101	1.6289	1.73549	0.121287		1.09385	0.960889	0.897192	0.983978	0.100343
TRCN0000234555		XAB2		9980880	12613792	9366488	10653720	1.72505e+06		0.652354	0.884848	0.644143	0.727115	0.136662		0.840852	0.947571	0.874572	0.887665	0.0545507
TRCN0000358757		XPA		12308608	16085152	14414360	1.42694e+07	1.89244e+06		0.873605	1.22918	1.03199	1.04493	0.17814		0.980331	0.939732	0.837609	0.919224	0.0735377
TRCN0000083196		XPA		5238232	4209616	4739568	4.72914e+06	514387		0.342373	0.295301	0.325945	0.321207	0.0238909		1.02131	0.935007	1.12299	1.02644	0.0940959
TRCN0000083194		XPA		29121888	28128152	28077384	2.84425e+07	588937		1.90342	1.97317	1.93091	1.93583	0.0351347		0.996072	0.914788	0.960519	0.957126	0.0407479
TRCN0000307194		XPC		16975008	10120008	9959608	1.23515e+07	4.00484e+06		1.2048	0.773341	0.713055	0.897067	0.268207		1.22049	1.12656	0.980637	1.10923	0.12086
TRCN0000307193		XPC		8249656	8094000	7470560	7938072	412290		0.539201	0.567788	0.513758	0.540249	0.02703		0.962737	0.95605	1.05668	0.991823	0.0562678
TRCN0000296566		XPC		27946576	28611056	28130664	28229432	343074		1.8266	2.00704	1.93458	1.92274	0.0908028		0.946799	0.884656	1.01533	0.948928	0.0653623
TRCN0000007913		XRCC1		10386256	8365888	9359080	9370408	1.01023e+06		0.737166	0.639296	0.67006	0.682174	0.0500467		1.13335	1.02686	0.981964	1.04739	0.0777519
TRCN0000273635		XRCC1		32782360	31551776	31261288	3.18651e+07	807504		2.32673	2.41109	2.23814	2.32532	0.086484		1.11525	1.06993	0.934746	1.03997	0.0939045
TRCN0000273633		XRCC1		15481440	17671584	16170144	16441056	1.11992e+06		1.01187	1.23965	1.11204	1.12119	0.114163		0.94087	0.958249	0.981387	0.960169	0.0203268
TRCN0000255927		XRCC2		17082248	11316360	12979784	1.37928e+07	2.96768e+06		1.21241	0.864763	0.929284	1.00215	0.184927		1.16419	1.07231	0.926795	1.05443	0.119704
TRCN0000255930		XRCC2		26812512	19132560	18224880	21389984	4.71793e+06		1.90302	1.46205	1.3048	1.55663	0.310119		1.21111	1.06512	1.01328	1.0965	0.102583
TRCN0000255928		XRCC2		29348960	25755352	26431128	27178480	1.90982e+06		2.08305	1.96815	1.89233	1.98117	0.0960241		1.10819	1.021	0.991234	1.04014	0.0607816
TRCN0000428071		XRCC3		13519472	11738216	13984768	1.30808e+07	1.18577e+06		0.959546	0.897	1.00124	0.952594	0.0524644		1.13314	1.10907	0.953666	1.06529	0.0974168
TRCN0000083043		XRCC3		12391016	13236144	12627456	1.27515e+07	436013		0.809882	0.928506	0.868404	0.86893	0.0593137		0.937448	0.932533	1.02503	0.965004	0.052042
TRCN0000083047		XRCC3		18798456	19742992	18863392	1.91349e+07	527583		1.22867	1.38496	1.29726	1.30363	0.0783354		0.954114	0.861988	1.06328	0.959794	0.100766
TRCN0000009875		XRCC4		6623904	6192280	4359808	5.72533e+06	1.20211e+06		0.470133	0.473196	0.312139	0.418489	0.0921145		1.00668	0.967063	0.849385	0.941043	0.0818119
TRCN0000040116		XRCC4		7683360	6232512	5727304	6.54773e+06	1.01541e+06		0.545328	0.47627	0.410045	0.477214	0.0676464		1.08939	0.954519	0.926351	0.990086	0.0871428
TRCN0000040117		XRCC4		20126680	16410408	15525320	17354136	2.44154e+06		1.42849	1.25403	1.11153	1.26469	0.15875		1.08235	1.0007	0.902904	0.995317	0.089842
TRCN0000221595		XRCC5		16511448	17213176	16023608	16582744	597980		1.1719	1.31538	1.14721	1.2115	0.0908097		0.897759	0.786095	0.858119	0.847324	0.0566091
TRCN0000288701		XRCC5		2736792	3333328	2118440	2729520	607477		0.178878	0.23383	0.145687	0.186132	0.044517		0.905086	0.806997	0.805382	0.839155	0.0571034
TRCN0000018363		XRCC5		8601800	11549200	10295080	1.01487e+07	1.47914e+06		0.562217	0.810168	0.708004	0.693463	0.124613		0.954378	0.910304	1.07075	0.978478	0.0828952
TRCN0000039609		XRCC6		8818232	5826080	5446520	6696944	1.84687e+06		0.625875	0.445212	0.389942	0.48701	0.123395		1.18357	0.976123	0.961425	1.04037	0.124232
TRCN0000353003		XRCC6		13489200	7780520	8559192	9.94297e+06	3.0957e+06		0.957398	0.594564	0.612793	0.721585	0.204423		1.08295	1.01059	0.986327	1.02662	0.0502666
TRCN0000332902		XRCC6		23241400	19269720	21142144	2.12178e+07	1.98692e+06		1.64956	1.47253	1.51367	1.54525	0.0926445		1.05121	0.964366	0.844033	0.953203	0.104039
TRCN0000315309		YBX1		1776656	1345680	1241712	1.45468e+06	283641		0.126098	0.102833	0.0889	0.105944	0.0187933		1.15564	1.13277	0.994939	1.09445	0.0869333
TRCN0000315307		YBX1		2771176	1711120	2077144	2186480	538419		0.196685	0.130759	0.148712	0.158719	0.034083		1.08401	1.18677	0.917049	1.06261	0.136129
TRCN0000007950		YBX1		9694656	5324440	5341568	6786888	2.51822e+06		0.68808	0.406878	0.382428	0.492462	0.16985		1.09597	1.02517	0.980418	1.03385	0.0582633
EMPTY				563976	279120	254064	365720	172151		0.0247613	0.0162778	0.016659	0.0192327	0.00479169		0.314538	0.441998	0.647689	0.468075	0.1681
EMPTY				6498576	5421896	4966776	5.62908e+06	786637		0.536395	0.766363	0.315361	0.539373	0.225516		1.01035	0.930802	0.87154	0.937564	0.0696522
EMPTY				9200656	7670256	9307480	8.72613e+06	915973		0.759426	1.08416	0.59097	0.811518	0.250688		1.04504	0.916936	1.01057	0.990847	0.0662888
EMPTY				11047944		13070552	12059248	1.4302e+06		0.911901		0.829903	0.870902	0.0579818		1.03925	0.9609	0.932365	0.977504	0.0553415
TRCN0000231782		pLKO_TRC021		12134616	12635000	13868960	1.28795e+07	892654		1.0016	1.78591	0.880597	1.2227	0.491489		0.946552	0.892022	0.97123	0.936601	0.0405308
TRCN0000231782		pLKO_TRC021		10870864	13310968	15187648	13123160	2.16451e+06		0.897285	1.88145	0.964326	1.24769	0.549878		1.03445	0.944571	0.970933	0.983319	0.0462039
EMPTY				234736	702232	176784	371251	288099		0.0150044	0.037774	0.00787403	0.0202175	0.0156168		0.485456	0.548697	0.297599	0.443917	0.130601
EMPTY				6616728	11385120	9456808	9.15289e+06	2.39868e+06		0.422944	0.612421	0.42121	0.485525	0.109899		0.929252	0.89835	0.916507	0.914703	0.0155302
EMPTY				433104	502792	504168	480021	40637.4		0.0346579	0.0386107	0.0369045	0.0367244	0.00198256		0.383592	0.527594	0.518633	0.476606	0.0806772
EMPTY				9974336	9346296	10713496	10011376	684352		0.798167	0.717726	0.784216	0.766703	0.042985		1.01294	1.05447	0.98029	1.0159	0.0371808
TRCN0000231782		pLKO_TRC021		13180488	12472912	13401128	13018176	484928		1.05473	0.957827	0.980948	0.997835	0.0506107		1.01004	1.05664	0.999583	1.02209	0.0303737
TRCN0000231782		pLKO_TRC021		14775376	11864448	15473104	1.40376e+07	1.9141e+06		1.18236	0.911102	1.13261	1.07536	0.144407		1.07213	1.03552	0.966251	1.02463	0.0537711
EMPTY				6370296	7098536	6792288	6.75371e+06	365650		0.512774	0.523107	0.461283	0.499055	0.0331171		0.930132	0.935851	0.932727	0.932903	0.00286381
EMPTY				612392	1345872	1426672	1128312	448623		0.0311975	0.105228	0.0818502	0.0727586	0.0378434		0.714278	0.683811	0.646181	0.681423	0.0341111
EMPTY				13782432	10857040	12199680	1.22797e+07	1.46434e+06		0.702128	0.848865	0.699913	0.750302	0.0853655		1.05691	0.930665	0.910221	0.965933	0.0794516
EMPTY				15859728	9926776	13732552	1.3173e+07	3.00579e+06		0.807953	0.776132	0.787856	0.790647	0.0160929		1.06219	0.914151	1.05795	1.01143	0.0842722
TRCN0000231782		pLKO_TRC021		15466080	10220368	17885744	14524064	3.91855e+06		0.787899	0.799087	1.02613	0.871039	0.13443		1.03676	0.87651	0.991114	0.968128	0.0825603
TRCN0000231782		pLKO_TRC021		17708488	11181376	19571456	1.61538e+07	4.40582e+06		0.902136	0.874224	1.12284	0.966401	0.1362		1.04663	0.841537	1.00698	0.965048	0.108785
EMPTY				175272	129472	155416	153387	22967.3		0.0129478	0.0090115	0.00879134	0.0102502	0.00233878		0.564345	0.474601	0.0801202	0.373022	0.257599
EMPTY				436856	465848	248640	383781	117930		0.0322717	0.0324239	0.0140647	0.0262534	0.010556		0.565134	0.495916	0.0711731	0.377408	0.267456
EMPTY				372896	836968	685272	631712	236627		0.0275468	0.0582546	0.0387634	0.0415216	0.0155386		0.570531	0.383202	0.0649533	0.339562	0.255598
EMPTY				6877688	11994856	18304320	12392288	5.72367e+06		0.508073	0.834865	1.03541	0.792783	0.266176		0.863585	0.905545	1.04132	0.936816	0.0929011
TRCN0000231782		pLKO_TRC021		12023488	11761616	22099440	15294848	5.8944e+06		0.888207	0.818631	1.25009	0.985642	0.231644		1.00157	0.903106	1.05439	0.986358	0.0767832
TRCN0000231782		pLKO_TRC021		12762400	12121976	24005440	1.62966e+07	6.68372e+06		0.942792	0.843713	1.3579	1.04814	0.272802		0.975619	0.929545	1.05831	0.987823	0.0652423
EMPTY				280752	149896	151576	194075	75069.5		0.0209987	0.0118177	0.0107645	0.014527	0.00562934		0.270935	0.236289	0.312238	0.273154	0.0380229
EMPTY				263024	174264	188024	208437	47771.5		0.0196727	0.0137389	0.013353	0.0155882	0.00354257		0.391217	0.291116	0.343437	0.341923	0.0500679
EMPTY				314352	217992	251448	261264	48924.2		0.0235118	0.0171863	0.0178572	0.0195184	0.00347456		0.343455	0.333734	0.288523	0.321904	0.0293147
EMPTY				1187896	1181632	1529280	1.2996e+06	198931		0.088848	0.0931591	0.108606	0.0968709	0.0103887		0.407782	0.316446	0.370285	0.364838	0.0459113
EMPTY				1105248	2135864	2537144	1.92609e+06	738639		0.0826664	0.16839	0.180182	0.143746	0.0532241		0.840147	0.888026	0.898517	0.875563	0.031117
TRCN0000231782		pLKO_TRC021		12080536	12082904	12998840	1.23874e+07	529501		0.903557	0.952608	0.923145	0.926436	0.0246907		0.964215	0.98311	0.973233	0.973519	0.00945063
EMPTY				274672	133760	184112	197515	71405.7		0.0165501	0.00976419	0.0121496	0.0128213	0.00344248		0.493114	0.163868	0.260956	0.305979	0.169177
EMPTY				265936	279528	249552	265005	15009.7		0.0161969	0.0164345	0.0170392	0.0165569	0.00043423		0.384696	0.229785	0.234988	0.283156	0.0879748
EMPTY				297320	389360	655864	447515	186212		0.0181084	0.022892	0.0447817	0.028594	0.0142215		0.258094	0.429072	0.432189	0.373118	0.0996263
EMPTY				579216	563456	310080	484251	151042		0.0352774	0.0331278	0.0211719	0.029859	0.00759963		0.416146	0.310889	0.180207	0.302414	0.118197
TRCN0000231782		pLKO_TRC021		15110512	14059888	11865088	13678496	1.65599e+06		0.920312	0.826635	0.810136	0.852361	0.0594226		0.971572	1.17313	0.881432	1.00871	0.149355
TRCN0000231782		pLKO_TRC021		15899880	15973336	11660528	14511248	2.46907e+06		0.968389	0.939134	0.796169	0.901231	0.0921544		0.995831	1.14065	0.90619	1.01422	0.118305
EMPTY				29756824	26801064	29997208	2.88517e+07	1.77996e+06		1.97389	2.6079	1.35511	1.97897	0.62641		0.945853	0.886396	0.964124	0.932124	0.0406421
EMPTY				203480	449360	187520	280120	146783		0.013119	0.0193865	0.0111579	0.0145545	0.00429801		0.200247	0.191967	0.118797	0.170337	0.0448263
EMPTY				703560	967720	378208	683163	295285		0.0453606	0.0417498	0.0225043	0.0365383	0.0122871		0.170746	0.121685	0.120705	0.137712	0.0286125
EMPTY				530144	1006304	750152	762200	238309		0.0341799	0.0434144	0.044636	0.0407434	0.00571689		0.161455	0.0739273	0.127345	0.120909	0.0441173
TRCN0000231782		pLKO_TRC021		15047880	18495976	14871344	16138400	2.04363e+06		0.970181	0.797962	0.884883	0.884342	0.0861108		0.982174	0.998606	0.992491	0.99109	0.00830517
TRCN0000231782		pLKO_TRC021		14731304	19854640	15010432	1.65321e+07	2.88076e+06		0.94977	0.856578	0.893159	0.899836	0.0469536		1.00585	0.967812	0.975608	0.98309	0.0200923
EMPTY				284736	299784	124752	236424	97003		0.0202092	0.0229086	0.00893158	0.0173498	0.00741427		0.208574	0.158182	0.268177	0.211644	0.055062
EMPTY				386816	263888	88912	246539	149708		0.0274543	0.0201655	0.00636563	0.0179952	0.0107106		0.324872	0.143854	0.265699	0.244808	0.0922996
EMPTY				211768	162392	123080	165747	44439.1		0.0138412	0.0113917	0.00846434	0.0112324	0.00269198		0.126624	0.199415	0.154067	0.160036	0.0367609
EMPTY				115704	106464	633552	285240	301682		0.00756246	0.00746837	0.0435701	0.0195336	0.0208162		0.222429	0.168363	0.178924	0.189905	0.0286571
EMPTY				845016	567208	87696	499973	383111		0.0552306	0.0397892	0.00603095	0.0336836	0.0251617		0.216181	0.192378	0.204662	0.204407	0.0119033
EMPTY				425176	904384	273864	534475	329163		0.0277897	0.0634419	0.0188339	0.0366885	0.0235979		0.129749	0.216084	0.18366	0.176497	0.0436106
TRCN0000208001		pLKO.1-emptyT		12556112	12580560	13153360	12763344	337985		0.820673	0.882517	0.904571	0.869253	0.0434933		0.995646	0.994982	1.09989	1.03017	0.0603754
TRCN0000231782		pLKO_TRC021		12493584	13526760	13150800	13057048	522929		0.816586	0.948892	0.904395	0.889957	0.0673244		1.00241	1.03339	1.13518	1.05699	0.0694614
TRCN0000231782		pLKO_TRC021		15685264	13034488	16126032	1.49486e+07	1.67225e+06		1.0252	0.91436	1.109	1.01619	0.0976348		0.978055	0.994014	1.10204	1.0247	0.0674507

## Sheet: ELISA Controls
Raw datas	tGFP1	tGFP2	shRNA POLK1	shRNA POLK2	NI + Puro	NI - Puro	tGFP1	tGFP2	shRNA POLK1	shRNA POLK2	pLK0	pLK0		- Dox	- Dox	+ Dox	+ Dox	Blocking	Blocking	tGFP1	tGFP2	shRNA POLK1	shRNA POLK2	pLK0	- Dox	+ Dox	Blocking		Ratio	Ratio	Ratio			Ratio vs NI - Puro								Ratio vs pLK0					POLK effect
ELISA values	A1	B1	C1	D1	E1	F1	A10	B10	C10	D10	E10	F10		A11	B11	C11	D11	E11	F11	Mean	Mean	Mean	Mean	Mean	Mean	Mean	Mean		- Dox vs + Dox	+ Dox vs Blocking	- Dox vs Blocking		Plate	tGFP1	tGFP2	POLK1	POLK2	NI + Puro	pLK0		Plate	tGFP1	tGFP2	POLK1	POLK2		POLK1 vs GFP1	POLK1 vs GFP2	POLK2 vs GFP1
1-1	15142160	13184608	2468608	8057016	316912	16127096	14547736	13967664	3664864	11646440	21334464	24218608		16179632	13097280	2612984	3160552	147368	152760	14844948	13576136	3066736	9851728	22776536	14638456	2886768	150064		5.07088	19.2369	97.5481		1-1	0.920497	0.841821	0.19016	0.61088	0.0196509	1.41231		1-1	0.651765	0.596058	0.134645	0.432538		0.206584	0.225892	0.663642
1-2	15837816	15483256	2981688	8361568	517392	13564152	16509296	17064216	2515328	8806840	16370400	17924176		17609872	14196360	3480768	2260688	203392	236128	16173556	16273736	2748508	8584204	17147288	15903116	2870728	219760		5.53975	13.063	72.3658		1-2	1.19238	1.19976	0.20263	0.63286	0.0381441	1.26416		1-2	0.943214	0.949056	0.160288	0.500616		0.169938	0.168892	0.530756
1-3	17001288	18504496	3297912	10070760	548064	11740104	13953160	14208176	3462456	8993928	16053408	14448312		13375064	12937736	1997864	2015528	59832	55872	15477224	16356336	3380184	9532344	15250860	13156400	2006696	57852		6.55625	34.6867	227.415		1-3	1.31832	1.3932	0.287918	0.811947	0.0466831	1.29904		1-3	1.01484	1.07249	0.221639	0.625036		0.218397	0.206659	0.615895
2-1	12578304	13726760	2138160	8374768	219016	10657832	11564400	12932528	1880400	7712176	13349776	10880792		9667984	12672128	2832168	2330120	83952	78880	12071352	13329644	2009280	8043472	12115284	11170056	2581144	81416		4.32756	31.7032	137.197		2-1	1.13263	1.25069	0.188526	0.754701	0.0205498	1.13675		2-1	0.996374	1.10023	0.165847	0.663911		0.16645	0.150738	0.666327
2-2	13302072	15928240	2191896	7876568		13597656	14529760	12323368	2125520	6484312		14147216		14285152	14200488	2283928	1847304		44032	13915916	14125804	2158708	7180440	14147216	14242820	2065616	44032		6.89519	46.9117	323.465		2-2	1.02341	1.03884	0.158756	0.528065	0	1.04042		2-2	0.98365	0.998486	0.152589	0.507551		0.155125	0.15282	0.515988
2-3	14039600	14879424	2540200	10325216	409464	12875384	14635720	14689848	1825328	7036528	14589784	16909216		12506848	12304320	2082928	2112104	96376	84048	14337660	14784636	2182764	8680872	15749500	12405584	2097516	90212		5.91442	23.251	137.516		2-3	1.11357	1.14829	0.16953	0.674222	0.0318021	1.22323		2-3	0.910357	0.938737	0.138593	0.551184		0.15224	0.147637	0.605459
3-1	10911688	12316888	2220440	7065568	149368	8927896	11468280	10809264	2180592	6086792	13924632	17364280		11587184	12353256	2029184	2269736	90464	197440	11189984	11563076	2200516	6576180	15644456	11970220	2149460	143952		5.56894	14.9318	83.1542		3-1	1.25337	1.29516	0.246476	0.736588	0.0167305	1.75231		3-1	0.715268	0.739117	0.140658	0.420352		0.196651	0.190305	0.587684
3-2	11441848	11959080	2148064	6908848	489432	10565584	15959504	10936536	2181400	7290488	13790584	23390112		14144968	16438792	2574600	2096112	84568	54288	13700676	11447808	2164732	7099668	18590348	15291880	2335356	69428		6.54799	33.6371	220.255		3-2	1.29673	1.0835	0.204885	0.671962	0.0463232	1.75952		3-2	0.736978	0.615793	0.116444	0.381901		0.158002	0.189096	0.518198
3-3	15459392	12380272	2888208	8685184	398576	15223848	16173768	14683000	2798232	8074944	20414192	24488856		13347336	13597000	2035168	2201824	74936	112144	15816580	13531636	2843220	8380064	22451524	13472168	2118496	93540		6.35931	22.648	144.026		3-3	1.03893	0.888845	0.186761	0.550456	0.026181	1.47476		3-3	0.704477	0.602705	0.126638	0.373251		0.179762	0.210117	0.529828
4-1	11533528	13993288	2648928	6788640	298784	13240936	12452312	11432536	1616336	6313328	13002640	11990456		15935784	12590072	1853152	1744432	156528	70472	11992920	12712912	2132632	6550984	12496548	14262928	1798792	113500		7.92917	15.8484	125.665		4-1	0.905746	0.960122	0.161064	0.494752	0.0225652	0.943781		4-1	0.959699	1.01731	0.170658	0.524223		0.177824	0.167753	0.546238
4-2	12398520	11827960	1797552	6240504	313480	10907496	12589352	12098976	3806288	4713072	13069944	12974232		14389488	13283592	2187704	2215200	97464	72504	12493936	11963468	2801920	5476788	13022088	13836540	2201452	84984		6.28519	25.9043	162.813		4-2	1.14544	1.09681	0.25688	0.502112	0.0287399	1.19387		4-2	0.959442	0.918706	0.215167	0.420577		0.224262	0.234206	0.438356
4-3	13327296	15517208	2502456	8130368	500808	10334624	12755360	12041568	2274816	7882024	13674696	13648128		11138424	13191456	2069976	1996232	61192	108176	13041328	13779388	2388636	8006196	13661412	12164940	2033104	84684		5.98343	24.0081	143.651		4-3	1.26191	1.33332	0.231129	0.774696	0.0484592	1.32191		4-3	0.954611	1.00864	0.174845	0.586045		0.183159	0.173348	0.61391
5-1	13314408	13273792	2630280	7154480	440984	10187352	11166720	13610256	2798952	5919224	12489800	12356584		14635720	14531512	3561008	2436096	126304	207872	12240564	13442024	2714616	6536852	12423192	14583616	2998552	167088		4.86355	17.9459	87.281		5-1	1.20155	1.31948	0.266469	0.641664	0.0432874	1.21947		5-1	0.985299	1.08201	0.218512	0.526181		0.221772	0.20195	0.534032
5-2	14797144	13024008	2597416	6635384	1131368	10122896	12648952	11373232	2251032	7327472	13841616	13298264		11908224	10964960	1733496	1847656	45080	205504	13723048	12198620	2424224	6981428	13569940	11436592	1790576	125292		6.3871	14.2912	91.2795		5-2	1.35564	1.20505	0.239479	0.689667	0.111763	1.34052		5-2	1.01128	0.898944	0.178647	0.514477		0.176653	0.198729	0.508737
5-3	11893096	13080888	2521816	7405512	401576	10110984	11862872	12709248	2018072	5719248	12403504	17046064		12468936	12341352	2108208	2188776	128936	126856	11877984	12895068	2269944	6562380	14724784	12405144	2148492	127896		5.77388	16.7987	96.994		5-3	1.17476	1.27535	0.224503	0.649035	0.0397168	1.45632		5-3	0.806666	0.875739	0.154158	0.445669		0.191105	0.176032	0.552483
6-1	8958680	15187312	2358880	8056920	303704	11084464	14988272	14711616	2276568	7616696	16463256	22795784		13873792	14028248	2542768	2414224	91528	71264	11973476	14949464	2317724	7836808	19629520	13951020	2478496	81396		5.62882	30.4499	171.397		6-1	1.0802	1.34869	0.209097	0.707008	0.0273991	1.7709		6-1	0.609973	0.761581	0.118073	0.399236		0.193572	0.155037	0.654514
6-2	10733728	8313128	1707736	6447888	295928	8547296	9209352	10849880	1630600	5204704	9621888	15958232		13870608	13800640	2150096	2209864	91696	139512	9971540	9581504	1669168	5826296	12790060	13835624	2179980	115604		6.34667	18.8573	119.681		6-2	1.16663	1.121	0.195286	0.681654	0.0346224	1.49639		6-2	0.779632	0.749137	0.130505	0.455533		0.167393	0.174207	0.584292
6-3	17205664	12345616	2586304	8225944	601744	16916528	14569352	13497096	2231208	8098640	11696144	23164408		15330600	14315640	2220512	1896656	102312	142800	15887508	12921356	2408756	8162292	17430276	14823120	2058584	122556		7.20064	16.7971	120.95		6-3	0.939171	0.76383	0.142391	0.482504	0.0355714	1.03037		6-3	0.911489	0.741317	0.138194	0.468282		0.151613	0.186417	0.513755
7-1	9113312	11617784	1963368	5804976	473752	8975840	9768592	8818464	1871512	5741472	10280976	11123256		11990584	15103304	2424336	2299592	64680	106256	9440952	10218124	1917440	5773224	10702116	13546944	2361964	85468		5.73546	27.6357	158.503		7-1	1.05182	1.1384	0.213622	0.643196	0.0527808	1.19232		7-1	0.882158	0.954776	0.179165	0.539447		0.203098	0.187651	0.611509
7-2	16479264	17077680	2604456	9616888	499728	14562112	13791584	13428000	2502816	7856472	16026992	17686576		2649048	2489512	2850920	2683224	106296	88344	15135424	15252840	2553636	8736680	16856784	2569280	2767072	97320		0.928519	28.4327	26.4003		7-2	1.03937	1.04743	0.175362	0.59996	0.034317	1.15758		7-2	0.897883	0.904849	0.15149	0.518289		0.168719	0.16742	0.577234
7-3	9357696	13858256	2081080	7746968	343432	12051488	10592072	13776432	2795296	7134224	12055928	12724544		15594256	15757528	1926664	2161520	131344	68160	9974884	13817344	2438188	7440596	12390236	15675892	2044092	99752		7.66888	20.4917	157.149		7-3	0.827689	1.14653	0.202314	0.617401	0.0284971	1.02811		7-3	0.80506	1.11518	0.196783	0.600521		0.244433	0.176459	0.745933
8-1	11558184	7019248	2831992	8217088	602864	8302192	11824720	11301440	2595712	6693176	14270048	12803576		15911728	12987312	3846224	3389872	106088	88928	11691452	9160344	2713852	7455132	13536812	14449520	3618048	97508		3.99373	37.1051	148.188		8-1	1.40824	1.10336	0.326884	0.897972	0.072615	1.63051		8-1	0.863678	0.676699	0.200479	0.55073		0.232123	0.296261	0.637657
8-2	13007656	12858456	2091888	7288256	413568	9797488	13527344	15110768	2147936	6148384	13156640	15578200		14113912	14603256	14260272	14524344	96584	119232	13267500	13984612	2119912	6718320	14367420	14358584	14392308	107908		0.997657	133.376	133.063		8-2	1.35417	1.42737	0.216373	0.685719	0.0422116	1.46644		8-2	0.923443	0.973356	0.14755	0.467608		0.159782	0.151589	0.506374
8-3	21730344	17980480	3355056	10885952	276000	24970368	21095224	20146440	3177136	9326296	14775664	20580968		12600896	15225352	2099504	1930584	116000	110720	21412784	19063460	3266096	10106124	17678316	13913124	2015044	113360		6.90463	17.7756	122.734		8-3	0.857528	0.763443	0.130799	0.404725	0.0110531	0.707972		8-3	1.21125	1.07835	0.184752	0.571668		0.15253	0.171328	0.471967
9-1	13331648	14821784	4172920	7558224	634120	10494408	10377368	14467480	2739272	7344248	14692288	14499392		14968824	13020912	3226464	2548840	127192	145656	11854508	14644632	3456096	7451236	14595840	13994868	2887652	136424		4.84645	21.1667	102.584		9-1	1.1296	1.39547	0.329327	0.71002	0.0604246	1.39082		9-1	0.812184	1.00334	0.236786	0.510504		0.291543	0.235997	0.628557
9-2	10538144	11521312	2369912	10794944	406440	13250088	15339912	16193408	3367832	8011280	12255872	16385944		14035432	12891864	2220648	1904368	159744	100632	12939028	13857360	2868872	9403112	14320908	13463648	2062508	130188		6.5278	15.8425	103.417		9-2	0.976524	1.04583	0.216517	0.709664	0.0306745	1.08082		9-2	0.903506	0.967631	0.200328	0.6566		0.221722	0.207029	0.726725
9-3	14102584	14973136	3752184	10927576	215544	14765728	15836296	16057696	3165496	9183968	15338568	13883520		13513280	16310168	2554144	2646856	110088	170744	14969440	15515416	3458840	10055772	14611044	14911724	2600500	140416		5.73418	18.52	106.197		9-3	1.0138	1.05077	0.234248	0.681021	0.0145976	0.989524		9-3	1.02453	1.0619	0.236728	0.688231		0.23106	0.222929	0.671753
10-1	12741088	14824328	2059024	7921016	392808	11573096	10892336	13088736	1849520	7054488	13369704	13370264		17716904	13954848	2280744	2014208	156776	270064	11816712	13956532	1954272	7487752	13369984	15835876	2147476	213420		7.37418	10.0622	74.2005		10-1	1.02105	1.20595	0.168863	0.646996	0.0339415	1.15526		10-1	0.883824	1.04387	0.146169	0.560042		0.165382	0.140026	0.633658
10-2	13024560	13791048	3411832	6855104	347600	12103776	13593008	11261920	2057240	6735592	12414192	12953864		13430480	12575936	2120072	1749688	195984	55168	13308784	12526484	2734536	6795348	12684028	13003208	1934880	125576		6.72042	15.408	103.549		10-2	1.09956	1.03492	0.225924	0.561424	0.0287183	1.04794		10-2	1.04926	0.987579	0.215589	0.535741		0.205469	0.2183	0.510591
10-3	14059704	15179144	2430936	7772456	338352	12838168	14125864	13255544	2231488	7704576	12628888	15533192		11275104	10594512	2715736	2609904	190296	224024	14092784	14217344	2331212	7738516	14081040	10934808	2662820	207160		4.10648	12.8539	52.7844		10-3	1.09773	1.10743	0.181584	0.602774	0.0263552	1.09681		10-3	1.00083	1.00968	0.165557	0.54957		0.165419	0.16397	0.549112
11-1	14387824	13650864	2664104	6310064	287320	13436208	13230352	12384680	2360488	6621568	17503280	15689448		11122848	10978952	3042680	2452144	166504	107144	13809088	13017772	2512296	6465816	16596364	11050900	2747412	136824		4.02229	20.0799	80.7673		11-1	1.02775	0.968858	0.18698	0.481223	0.021384	1.2352		11-1	0.832055	0.784375	0.151376	0.389592		0.181931	0.19299	0.468229
11-2	7100992	14960008	2760496	8610416	348896	11536280	11821192	13698528	2142792	7082608	12559440	14838648		13279984	14833176	2099968	2219704	70800	92768	9461092	14329268	2451644	7846512	13699044	14056580	2159836	81784		6.50817	26.409	171.874		11-2	0.820116	1.2421	0.212516	0.68016	0.0302434	1.18747		11-2	0.690639	1.046	0.178965	0.572778		0.259129	0.171093	0.829345
11-3	16565632	10941912	2963736	8840528	407216	11618464	13161464	14539616	2866984	6905696	15782664	14524816		8668712	8961320	2434304	2352120	93312	113136	14863548	12740764	2915360	7873112	15153740	8815016	2393212	103224		3.68334	23.1846	85.397		11-3	1.2793	1.0966	0.250925	0.677638	0.035049	1.30428		11-3	0.98085	0.840767	0.192386	0.519549		0.196142	0.228821	0.529693
12-1	16615704	16374688	2748984	10228264	453488	16162552	16936088	15111640	3005256	7070856	14488120	18349688		16965088	13915336	2404888	2262792	180720	112720	16775896	15743164	2877120	8649560	16418904	15440212	2333840	146720		6.6158	15.9068	105.236		12-1	1.03795	0.974052	0.178011	0.535161	0.0280579	1.01586		12-1	1.02174	0.958844	0.175232	0.526805		0.171503	0.182754	0.515595
12-2	15734968	16574136	2920416	8634872	355712	11530184	14215608	15226168	2145864	10736336	16943088	17074064		15128904	13514256	2559944	2019944	152456	115808	14975288	15900152	2533140	9685604	17008576	14321580	2289944	134132		6.25412	17.0723	106.772		12-2	1.29879	1.379	0.219696	0.840022	0.0308505	1.47513		12-2	0.880455	0.934831	0.148933	0.569454		0.169155	0.159315	0.646772
12-3	12659176	9271416	3032616	8409384	407536	10809120	15113400	13618536	2659920	7336504	13395856	15895744		11823096	11081672	2056864	1981656	108672	82368	13886288	11444976	2846268	7872944	14645800	11452384	2019260	95520		5.67157	21.1397	119.895		12-3	1.28468	1.05883	0.263321	0.728361	0.037703	1.35495		12-3	0.948141	0.781451	0.19434	0.537556		0.20497	0.248691	0.566958
13-1	14267112	15699328	2449448	9708808	279496	10374592	14620248	13556584	2813848	8263632	14203560	15946896		16186032	16174992	2866504	2369136	147424	298720	14443680	14627956	2631648	8986220	15075228	16180512	2617820	223072		6.18091	11.7353	72.5349		13-1	1.39222	1.40998	0.253663	0.866176	0.0269404	1.45309		13-1	0.958107	0.970331	0.174568	0.596092		0.182201	0.179905	0.622156
13-2	11521968	9200208	2201184	6642952	367440	8051608	11289592	12014488	2196352	5094128	9099872	11453888		10800592	11982856	2627880	2781480	169120	114808	11405780	10607348	2198768	5868540	10276880	11391724	2704680	141964		4.21186	19.0519	80.2438		13-2	1.41658	1.31742	0.273084	0.728866	0.0456356	1.27638		13-2	1.10985	1.03216	0.213953	0.571043		0.192777	0.207287	0.514523
13-3	20765136	15125344	3482912	12148000	506912	17896232	20497712	12276872	3065016	9200336	24702960	19569784		13467680	12960464	2586504	2620520	81368	284888	20631424	13701108	3273964	10674168	22136372	13214072	2603512	183128		5.07548	14.2169	72.1576		13-3	1.15284	0.765586	0.182942	0.596448	0.0283251	1.23693		13-3	0.932015	0.618941	0.1479	0.4822		0.158688	0.238956	0.517374
14-1	13820848	11426136	2560640	8017112	385368	10462424	12602640	12850288	2272864	7699424	14681880	16338888		15689168	12451784	2349032	2908944	86440	267568	13211744	12138212	2416752	7858268	15510384	14070476	2628988	177004		5.35205	14.8527	79.4924		14-1	1.26278	1.16017	0.230994	0.751094	0.0368335	1.48248		14-1	0.8518	0.782586	0.155815	0.506646		0.182925	0.199103	0.594794
14-2	24358104	22357008	2855056	10277624	403896	21900576	23479728	16479792	2668096	11815048	21114808	25243232		16237360	16359776	2497304	2779592	81448	148952	23918916	19418400	2761576	11046336	23179020	16298568	2638448	115200		6.17733	22.9032	141.481		14-2	1.09216	0.886662	0.126096	0.504386	0.0184423	1.05837		14-2	1.03192	0.837758	0.119141	0.476566		0.115456	0.142214	0.461824
14-3	11230920	14277280	2550464	7881360	290896	12228168	10308880	13404912	2056968	7978464	14840040	18771952		13140400	12440336	2729568	2745440	194528	251384	10769900	13841096	2303716	7929912	16805996	12790368	2737504	222956		4.67227	12.2782	57.3672		14-3	0.880745	1.1319	0.188394	0.648496	0.023789	1.37437		14-3	0.640837	0.823581	0.137077	0.47185		0.213903	0.16644	0.736303
15-1	15259904	15478408	1918648	8692168	197272	11692696	15187224	16086280	1929088	6889976	11333560	16845320		18608856	16419824	2140752	2629736	126568	148784	15223564	15782344	1923868	7791072	14089440	17514340	2385244	137676		7.34279	17.3251	127.214		15-1	1.30197	1.34976	0.164536	0.66632	0.0168714	1.20498		15-1	1.08049	1.12015	0.136547	0.552972		0.126374	0.1219	0.511777
15-2	15408544	13868368	1718240	5579808	168936	7957944	14921368	14538648	1948600	6105632	15525616	10646560		16143416	15959120	2446872	2445280	110248	111904	15164956	14203508	1833420	5842720	13086088	16051268	2446076	111076		6.56205	22.0216	144.507		15-2	1.90564	1.78482	0.230389	0.7342	0.0212286	1.64441		15-2	1.15886	1.08539	0.140105	0.446483		0.120898	0.129082	0.385278
15-3	14264112	11679520	1456856	5985896	282744	9922512	13640568	12033448	2431776	7071184	14481496	13453536		12734592	12398120	1880992	1833640	91976	88432	13952340	11856484	1944316	6528540	13967516	12566356	1857316	90204		6.76587	20.5902	139.31		15-3	1.40613	1.19491	0.19595	0.657952	0.0284952	1.40766		15-3	0.998913	0.848861	0.139203	0.467409		0.139354	0.163988	0.467917
16-1	12752872	11654648	2030912	7128864	328064	11212600	13422216	12422088	2004792	7519136	14057720	16541848		13882504	13050168	3408008	2639168	241408	137672	13087544	12038368	2017852	7324000	15299784	13466336	3023588	189540		4.45376	15.9522	71.0475		16-1	1.16722	1.07365	0.179963	0.653194	0.0292585	1.36452		16-1	0.855407	0.786833	0.131888	0.4787		0.154181	0.167618	0.559616
16-2	16030656	12631224	1451928	7306424	288360	11969200	14080816	12842336	2195424	8310216	14917856	13592784		14650480	15603592	2401448	2570880	103744	210008	15055736	12736780	1823676	7808320	14255320	15127036	2486164	156876		6.08449	15.848	96.4267		16-2	1.25787	1.06413	0.152364	0.652368	0.0240918	1.191		16-2	1.05615	0.893476	0.12793	0.547748		0.121128	0.143182	0.518628
16-3	11508720	7675264	1075984	6851296	436480	11124992	13623816	12517096	2149112	8469176	17751096	11330896		9979200	10097184	1761488	1850464	79776	208896	12566268	10096180	1612548	7660236	14540996	10038192	1805976	144336		5.55832	12.5123	69.5474		16-3	1.12955	0.907522	0.144948	0.688561	0.0392342	1.30706		16-3	0.864196	0.694325	0.110897	0.526803		0.128324	0.159719	0.609587
[truncated: 4 more columns]
