# Supplementary material for: Cell-based cccDNA reporter assay combined with functional genomics identifies YBX1 as HBV cccDNA host factor and antiviral candidate target
Source: Gut. 2022 Dec 9;72(9):1745–57. doi: 10.1136/gutjnl-2020-323665 (PMC10423543; doi:10.1136/gutjnl-2020-323665)
Supplement: Supplementary data [file gutjnl-2020-323665supp003.xlsx]

## Sheet: Feuil1
Supplementary Table S3: qRT-PCR primers
Target
pgRNA - PreC RNA	Forward primer (824 - 801)*	GGTCCCCTAGAAGAAGAACTCCCT
	Reverse primer (737 - 760)*	CATTGAGATTCCCGAGATTGAGAT
	Probe (783 - 763)*	[6FAM]‐TCTCAATCGCCGCGTCGCAGA‐[BHQ1]
HDV genome	Forward primer	TGGACGTGCGTCCTCCT
	Reverse primer	TCTTCGGGTCGGCATGG
	Probe	[6FAM]-ATGCCCAGGTCGGAC-[BHQ1]
* from ayw reference sequence V01460.1
