# Supplementary material for: Cell-based cccDNA reporter assay combined with functional genomics identifies YBX1 as HBV cccDNA host factor and antiviral candidate target
Source: Gut. 2022 Dec 9;72(9):1745–57. doi: 10.1136/gutjnl-2020-323665 (PMC10423543; doi:10.1136/gutjnl-2020-323665)
Supplement: Supplementary data [file gutjnl-2020-323665supp004.xlsx]

## Sheet: Feuil1
	Supplementary Table S4: FRG-NOD mice
	animal	Mouse #1081	Mouse #1082		Mouse #1083
	Viral load (copies/mL)	6.8x10^8	1.7x10^9		3.7x10^8
	hAlbumin (mg/mL)	4.2	5.6		4.6
